1 **Neurodevelopmental, cognitive, behavioural and mental health impairments following**  
2 **childhood malnutrition: a systematic review**

3 Amir Kirolos 1,2, Magdalena Goyheneix 3, Mike Kalmus Eliaz 1, Mphatso Chisala 4, Samantha  
4 Lissauer 2,5, Melissa Gladstone\* 1, Marko Kerac\* 6

5 1. Institute of Life Course and Medical Sciences, Department of Women's and Children's  
6 Health, University of Liverpool, Liverpool, UK

7 2. Malawi-Liverpool-Wellcome Trust Clinical Research Programme, Blantyre, Malawi

8 3. ACNUR (La Agencia de la ONU para los Refugiados), United Nations High  
9 Commissioner for Refugees, Buenos Aires, Argentina

10 4. Malawi Epidemiology and Intervention Research Unit, Lilongwe/Karonga, Malawi

11 5. Institute of Infection, Veterinary & Ecological Sciences, University of  
12 Liverpool, Liverpool, UK

13 6. Centre for MARCH (Maternal, Adolescent, Reproductive & Child Health), London  
14 School of Hygiene & Tropical Medicine, London, UK

15 \* Indicates joint senior authors

16 Corresponding Author: Dr Amir Kirolos ([a.kirolos@liverpool.ac.uk](mailto:a.kirolos@liverpool.ac.uk))

17

18

19

20

21

22

23

24

25

26

**NOTE: This preprint reports new research that has not been certified by peer review and should not be used to guide clinical practice.**

27 **ABSTRACT**

28 **Background:** Severe childhood malnutrition impairs growth and development short-term, but  
29 current understanding of long-term outcomes is limited. We aimed to identify studies  
30 assessing neurodevelopmental, cognitive, behavioural and mental health outcomes following  
31 childhood malnutrition.

32 **Methods:** We systematically searched MEDLINE, EMBASE, Global Health and PsychINFO for  
33 studies assessing these outcomes in those exposed to childhood malnutrition in low- and  
34 middle-income settings. We included studies assessing undernutrition measured by low mid-  
35 upper arm circumference, weight-for-height, weight-for-age or nutritional oedema. We used  
36 guidelines for synthesis of results without meta-analysis to analyse three outcome areas:  
37 neurodevelopment, cognition/academic achievement, behaviour/mental health.

38 **Results:** We identified 30 studies, including some long-term cohorts reporting outcomes  
39 through to adulthood. There is strong evidence that malnutrition in childhood negatively  
40 impacts neurodevelopment based on high-quality studies using validated  
41 neurodevelopmental assessment tools. There is also strong evidence that malnutrition  
42 impairs academic achievement with agreement across seven studies investigating this  
43 outcome. 8 of 11 studies showed association between childhood malnutrition and impaired  
44 cognition. This moderate evidence is limited by some studies failing to measure important  
45 confounders such as socioeconomic status. 5 of 7 studies found a difference in behavioural  
46 assessment scores in those exposed to childhood malnutrition compared to controls but this  
47 moderate evidence is similarly limited by unmeasured confounders. Mental health impacts  
48 were difficult to ascertain due to few studies with mixed results.

49 **Conclusions:** Childhood malnutrition is associated with impaired neurodevelopment,  
50 academic achievement, cognition and behavioural problems but evidence regarding possible  
51 mental health impacts is inconclusive. Future research should explore the interplay of  
52 childhood and later-life adversities on these outcomes. Whilst evidence on improving  
53 nutritional and clinical therapies to reduce long-term risks is also needed, preventing and  
54 eliminating child malnutrition is likely to be the best way of preventing long-term  
55 neurocognitive harms.

56 **PROSPERO registration number:** CRD42021260498

57

58 **KEY QUESTIONS**

59

60 **What is already known?**

61

62 - High mortality risk and impaired growth are well-recognised short-term risks of  
63 childhood malnutrition

64

65 - Whilst there is increasing appreciation of longer-term risks for survivors, notably  
66 adult cardiometabolic non-communicable disease, other longer-term risks have  
67 been poorly described.

68

69 **What are the new findings?**

70 - There is strong evidence that malnutrition impairs neurodevelopment and  
71 academic achievement in childhood which has significant implications for future  
72 wellbeing and prospects of those affected

73

74 - Childhood malnutrition is associated with impaired cognition and behavioural  
75 problems with evidence of effects through to adolescence and adulthood but the  
76 effect of nutritional treatment and interplay with childhood adversity, co-existing  
77 illness such as HIV and environmental factors in influencing these outcomes is  
78 unclear

79

80 **What do the new findings imply?**

81 - Study findings imply that there are likely to be long-term effects of childhood  
82 malnutrition on cognition and wellbeing lasting through adolescence and  
83 adulthood

84

85 - Long-term needs of malnutrition survivors need to be carefully considered in  
86 treatment programmes. Further research is needed on the effects of nutritional  
87 therapy, adversity and environmental factors to tailor future interventions,  
88 particularly with regards to mental health which has been little researched

89

## 90 **INTRODUCTION**

91 Severe childhood malnutrition is widespread and has a high disease burden concentrated in  
92 low- and middle-income settings<sup>1</sup>. To date, most malnutrition policies and treatment  
93 programmes have focused on short-term risks, notably infections and death<sup>2,3</sup>. There is  
94 however growing evidence of long-term risks for malnutrition survivors, including that of  
95 later-life non-communicable disease<sup>4</sup>. The prevalence of malnutrition has decreased in  
96 recent years due to concerted global efforts<sup>1</sup>. However, climate change, conflict and food  
97 insecurity in many settings with fragile food supply chains risk resurgence and perpetuation  
98 of childhood malnutrition<sup>5</sup>.

99 Understanding long-term outcomes following child malnutrition is especially important  
100 because improved treatment has thankfully resulted in more children with malnutrition  
101 surviving into adolescence and adulthood<sup>3,6</sup>. Most previous research and programmatic  
102 investment have focused on child mortality rather than thriving and long-term outcomes.  
103 Fewer studies explore long-term impacts of malnutrition on cognitive, behavioural and  
104 mental health outcomes in survivors. Improved understanding of these outcomes can inform  
105 disease burden estimates, support ongoing investment and inform follow-up care for children  
106 with malnutrition.

107 Causal pathways linking malnutrition with neurodevelopment, cognition, behaviour and  
108 mental health are complex. Previous studies have found children admitted to hospital with  
109 severe malnutrition often have severe developmental delays and children with  
110 neurodisability are inherently at higher risk of becoming malnourished<sup>7,8</sup>. The relationship  
111 between malnutrition and development is also influenced by other associated factors such as  
112 childhood adversity, HIV-exposure, risk of infectious disease, parental engagement, school  
113 attendance and impaired growth<sup>9</sup>. These mediating factors also explain in part the difficulty  
114 in predicting developmental trajectories after an episode of severe malnutrition and why

115 studies investigating outcomes are significantly influenced by potential confounders affecting  
116 the internal validity of results <sup>10</sup>.

117 A 1995 review found school-age children who suffered from early childhood malnutrition  
118 generally had poorer IQ levels, cognitive function, school achievement and greater  
119 behavioural problems than matched controls and, to a lesser extent, siblings <sup>11</sup>. Despite these  
120 associations, previous evidence of direct causal relationships is limited due to a lack of long-  
121 term follow-up studies, retrospective study designs and few studies having investigated  
122 behaviour and mental health. With this lack of up-to-date evidence on an increasingly  
123 important topic we aimed to identify studies reporting neurodevelopmental, cognitive,  
124 behavioural and mental health outcomes for children exposed to malnutrition in childhood.

125

## 126 **METHODS**

127 Our systematic review protocol was registered on PROSPERO (CRD42021260498). We  
128 searched MEDLINE, EMBASE, Global Health and PsycINFO for studies published between 1<sup>st</sup>  
129 January 1995 and 6<sup>th</sup> January 2022 using PRISMA guidelines <sup>12</sup>. Detailed search strategies are  
130 included in Supplementary Appendix 1.

### 131 **Selection criteria**

132 We included studies from low- and middle-income countries reporting neurodevelopmental,  
133 cognitive, school/academic achievement, mental health or behavioural outcomes in children  
134 under five exposed to malnutrition (we did not exclude studies that included small numbers  
135 of children between the ages of five and six years). We defined childhood malnutrition as  
136 undernutrition using standard definitions (definitions which are commonly measured in  
137 research and often related to severe adverse outcomes <sup>13</sup>): moderate or severe wasting  
138 defined by low weight for height or low mid-upper arm circumference; presence of nutritional  
139 oedema; low weight-for-age as per older definitions of severe malnutrition. We did not  
140 include studies focusing on stunting (low height-for-age), chronic malnutrition or  
141 micronutrient deficiencies.

142 We included cross-sectional, cohort, case control and controlled trial study designs which had  
143 a comparator group not exposed to childhood malnutrition. We excluded conference papers

144 and reviews which did not include original data. We excluded studies which failed to define  
145 how malnutrition, child neurodevelopment, cognition, school/academic achievement, mental  
146 health or behaviour were measured. We also excluded studies looking at specific sub-  
147 populations of children (e.g. only children with a specific medical condition). No language  
148 restrictions were placed on studies.

#### 149 Literature search

150 Titles and abstracts were screened by two independent reviewers (two of AK, MGo, MKE,  
151 MC). Selected full texts by any reviewer were then independently reviewed by two reviewers  
152 (two of AK, MGo, MKE, MC) against our selection criteria. We also screened reference lists of  
153 included studies. Data extraction of included studies was done by one of AK or MGo into a  
154 standard template (including study characteristics, assessment tool, malnutrition definition,  
155 sample size, results in cases and controls, reported effect sizes, results of statistical  
156 significance tests, results of analyses adjusted for confounding variables). Data extraction was  
157 subsequently checked by a second separate reviewer (one of AK, ME, MC). Disagreements  
158 regarding inclusion of full texts and data extraction were resolved through mutual discussion.

#### 159 Quality assessment

160 We assessed study quality using the National Institute of Health and Care Excellence (NICE)  
161 quality appraisal checklist<sup>14</sup>. Studies were scored independently by two reviewers (two of AK,  
162 MGo, MKE, MC) with scoring disagreements resolved through mutual discussion. Internal and  
163 external validity were rated as poor, acceptable and very good based on NICE quality appraisal  
164 checklist results. We considered overall study quality to be high-quality when both internal  
165 and external validity scores were rated as very good, adequate-quality when either score was  
166 rated as acceptable and poor-quality where either internal or external validity was rated as  
167 poor.

#### 168 Synthesis of study results

169 We grouped studies into three outcome areas: neurodevelopmental, cognition/academic  
170 achievement and mental health/behavioural outcomes (with some studies reporting  
171 outcomes from more than one category). We undertook a narrative synthesis of results within  
172 each of these areas as diverse outcomes and measurement tools precluded meta-analysis.

173 We followed the Synthesis without meta-analysis (SWiM) reporting guidelines for analysing  
174 and reporting results <sup>15</sup>.

175 For neurodevelopmental studies we grouped studies and compared results by  
176 neurodevelopmental assessment tool used. For studies investigating cognition/academic  
177 achievement, we grouped those that measured IQ or executive function and those that  
178 measured either school or language performance/assessment results. For mental  
179 health/behaviour studies, we grouped studies that used behavioural assessment tools and  
180 then into groups by mental health condition or domain assessed.

181 For each study outcome where available, we recorded the unadjusted and adjusted results in  
182 cases and controls, reported effect sizes, and results from any statistical significance tests.  
183 When synthesizing results by the groupings described above, we used vote counting by  
184 direction of effect to assess the number of studies which recorded differences between cases  
185 and controls. We summarised results in tables indicating the number of studies with results  
186 indicating an effect of malnutrition on the study outcome within each outcome area. We also  
187 recorded the age group (childhood 0-10 years, adolescence 10-18 years, adulthood 18+ years)  
188 at which outcomes were measured to compare results between studies. When drawing  
189 conclusions from our synthesis we accounted for study quality scoring, whether results  
190 adjusted for confounding variables, sample size and the use of validated outcome  
191 tools/assessments. Where several high-quality studies in one grouped outcome area reported  
192 results of an association with malnutrition, we graded conclusions as strong evidence. Where  
193 most adequate and high-quality studies reported an association with malnutrition, but there  
194 were uncertainties or limitations of studies identified, we graded conclusions as moderate  
195 evidence. Where there were few studies identified or studies with mixed results or poor study  
196 quality, we graded associations as inconclusive.

197

## 198 **RESULTS**

### 199 **Study Characteristics**

200 Thirty studies met our selection criteria (Supplementary Figure 1) <sup>16-45</sup>. Full study  
201 characteristics are included in Supplementary Table 1. Studies were conducted between

202 1967-2019 across several countries in Africa, Asia and South America and included some long-  
203 term cohorts following participants through to adolescence and adulthood. Nine studies were  
204 part of the same Barbados Nutrition Study (BNS), a prospective lifelong cohort study assessing  
205 multiple outcomes at different follow-up points for children who suffered from malnutrition  
206 in the first year of life<sup>37-45</sup>. Nine studies assessed neurodevelopmental outcomes, 12 studies  
207 assessed cognition or academic achievement (three from BNS) and 14 studies assessed  
208 mental health conditions or behaviour (eight from BNS). Study designs included cross-  
209 sectional, retrospective cohorts, prospective cohorts and randomised controlled trial studies.  
210 Neurodevelopmental studies were either cross-sectional or had a short follow-up time during  
211 childhood. The age at follow-up following exposure to malnutrition in other studies varied  
212 from childhood through to adulthood.

213 Study quality scoring is included in Supplementary Table 2. Twenty-three studies had very  
214 good external validity, with the seven others apart from one with acceptable external validity.  
215 This was due to most providing good descriptions of study settings, populations and selection  
216 criteria. Fourteen studies had very good internal validity, 12 had acceptable internal validity  
217 and four studies had poor internal validity. Studies often scored poorly where important  
218 confounding variables such as socioeconomic status weren't accounted for in analyses,  
219 sample size was small or study designs were poor or poorly described, leading to potential  
220 biases. Overall, 14 studies were rated as high-quality, 12 were adequate-quality and four were  
221 poor-quality.

## 222 Malnutrition and neurodevelopment

223 We identified nine studies assessing neurodevelopmental outcomes of malnutrition (Table  
224 1). A summary of results from these studies is included in Supplementary Table 3. Five studies  
225 used the Bayley Scales of Infant Development (BSID). Three of these were adequate-quality  
226 studies which found impaired neurodevelopment in those with malnutrition unadjusted for  
227 confounding variables such as socioeconomic status and family characteristics<sup>19,30,36</sup>. Two  
228 high-quality studies using BSID found impaired neurodevelopment in those with malnutrition  
229 but one found that differences were no longer significant when adjusting for differences in  
230 current weight during follow-up at two years old<sup>23,33</sup>. A further high-quality study using the  
231 Denver-II tool found children with malnutrition had lower scores across fine motor, gross  
232 motor, language and personal-social domains compared to controls<sup>22</sup>. One adequate-quality



233 study using a neurodevelopment tool developed in India (Indian Council Medical Research  
234 Psychosocial Developmental Screening Test) found poorer development outcomes for those  
235 with malnutrition<sup>34</sup>. Another adequate-quality study using UNICEF Multiple Indicator Cluster  
236 Surveys (MICS) Early Childhood Development Indicators (ECDI) did not find an effect of  
237 malnutrition on neurodevelopment<sup>20</sup>. This was carried out on a large population sample from  
238 five country surveys in Asia, but the MICS ECDI tool consists of few basic developmental items  
239 which span a large age range. This is notably different to the detailed neurodevelopmental  
240 assessments by trained assessors used in most other studies. A poor-quality study using an  
241 Indian specific development tool (Indian Development Inventory), found poorer  
242 neurodevelopment scores in cases, but this was no longer significant when adjusted for  
243 confounding variables. The results from high- and adequate-quality studies provides strong  
244 evidence of an association between malnutrition in childhood and impaired  
245 neurodevelopment across multiple developmental domains.

#### 246 Malnutrition and cognition/academic achievement

247 We identified 12 studies (three from BNS) assessing cognitive outcomes of malnutrition (Table  
248 2). A summary of results from these studies is included in Supplementary Table 4. Seven  
249 studies assessed academic performance, with three based on self-report of school  
250 performance or schooling years achieved, and four based on tests of school skill such as  
251 mathematics or country specific language tests (Supplementary Table 4)<sup>17,18,21,28,32,38,43</sup>. Three  
252 studies were high-quality, three were adequate-quality and one was poor-quality. All studies  
253 (two from BNS) found worse school/academic performance in those exposed to malnutrition  
254 in childhood compared to controls. The results from high- and adequate-quality studies  
255 identified provides strong evidence of an association between exposure to malnutrition and  
256 impaired academic performance/achievement in childhood and adolescence.

257 Eleven studies investigated cognition using several tools assessing intelligence and executive  
258 function (Table 2, Supplementary Table 4). Eight of these studies (three from BNS) found  
259 impaired intelligence/executive function in those exposed to malnutrition in childhood  
260 compared to controls<sup>17,26,28,32,35,38,39,43</sup>. Two high-quality studies found no significant  
261 association between malnutrition and cognition<sup>16,21</sup>. One study from China found no  
262 difference between cases and controls using Wechsler Pre-school and Primary Scale of  
263 Intelligence (WPPSI-IV), and the other from Malawi found the differences seen between cases

264 and controls using the Cambridge Neuropsychological Test Automated Battery (CANTAB)  
265 were no longer significant when adjusting for confounding variables including HIV, stunting,  
266 socioeconomic status and household characteristics. Of the studies which found a significant  
267 difference in cognition between cases and controls, there were four high quality studies (two  
268 from BNS) <sup>26,32,38,39</sup>. These four high-quality studies all used different cognitive assessment  
269 tools, including Kauffman-ABC, Bohem Test, Trail Making Test and Wechsler Scale of  
270 Intelligence (Table 2), and found poorer scores in those exposed to malnutrition compared to  
271 controls. Three adequate-quality studies (one from BNS) using different cognitive assessment  
272 tools, including Mini-Mental State Exam, Wechsler Scale of Intelligence and Anstey Domino  
273 test (Table 2) also found those exposed to childhood malnutrition had impaired cognition  
274 compared to controls, however only one of these studies adjusted for any confounding  
275 variables (BNS study which adjusted for childhood standard of living) <sup>17,35,43</sup>. The results from  
276 high- and adequate-quality studies provide moderate evidence of an association between  
277 exposure to malnutrition in childhood and impaired cognition, but definitive conclusions are  
278 limited by mixed results from two high-quality studies showing no association after adjusting  
279 for important confounders such as HIV and socioeconomic status and results from several  
280 adequate-quality studies which failed to adjust for any confounding variables.

### 281 Malnutrition and mental health/behaviour

282 We identified 14 studies (eight from BNS) assessing mental health and behavioural outcomes  
283 of malnutrition (Table 3). A summary of results from these studies is included in  
284 Supplementary Table 5. Seven studies (three from BNS) assessed behaviour using different  
285 behavioural rating tools including the Strengths and Difficulties (SDQ), Child Behaviour  
286 Checklist, Ages and Stages (socio-emotional questions) and other adapted behavioural  
287 questionnaires (Table 3) <sup>16,22,29,31,39,42,44</sup>. Five of these studies, four of which were rated as  
288 high-quality, found significantly higher behavioural problems in those exposed to  
289 malnutrition in childhood <sup>22,29,31,39,44</sup>. One high-quality study found no difference in  
290 behavioural scores between cases and controls using SDQ and one adequate-quality study  
291 looking at conduct problems using found differences in behaviour were no longer significant  
292 when adjusting for confounding variables including childhood standard of living. The results  
293 from adequate- and high-quality studies provide moderate evidence of an association  
294 between exposure to malnutrition in childhood and increased behavioural problems but is

295 limited by some mixed results in high-quality studies and potential confounding in some  
296 studies reporting an association.

297 Seven studies (five from BNS) investigated different mental health outcomes (Table 3)  
298 <sup>17,24,37,40,41,43,45</sup>. Studies indicated possible associations with self-esteem, quality of life,  
299 personality disorders, attention deficits and low morale. There were small numbers of studies  
300 investigating specific mental health domains and there were significant study limitations in  
301 several studies included. The results from the studies identified provide inconclusive evidence  
302 regarding possible associations between exposure to malnutrition in childhood and poorer  
303 mental health outcomes.

304

## 305 **DISCUSSION**

306 Our review finds strong evidence that exposure to malnutrition in childhood impairs  
307 neurodevelopment and academic achievement. There is moderate evidence that childhood  
308 malnutrition is associated with impaired cognition and is associated with more behavioural  
309 problems throughout childhood and adolescence. However, there is uncertainty around the  
310 relative contributions of malnutrition and other associated factors (such as childhood  
311 adversity, HIV-exposure, socioeconomic status and household characteristics) to these  
312 outcomes. Research investigating mental health outcomes in children with malnutrition is  
313 inconclusive and there are few studies investigating specific mental health domains such as  
314 depression. These results have implications for policy makers surrounding the long-term care  
315 needs of those treated for childhood malnutrition and future research such as exploring how  
316 nutritional therapies affect these outcomes.

317 Due to study heterogeneity, we were unable to perform a meta-analysis of any results. We  
318 therefore used published guidelines to synthesize results and determine the strength of  
319 evidence for each outcome area. Despite this, there are still limitations given potential  
320 publication bias of positive associations between malnutrition and the outcomes  
321 investigated. Our review however builds on previously published evidence which has  
322 suggested links between malnutrition and poorer IQ levels, cognitive function, school  
323 achievement and greater behavioural problems<sup>11</sup>. Our findings strengthen the evidence-base  
324 regarding these associations as previous findings were limited by difficulties in interpreting

325 retrospective case control studies, but our review includes evidence from prospective studies  
326 which have sought to minimise these biases. There are however several poor- or adequate-  
327 quality studies we identified which failed to account for important confounders such as  
328 socioeconomic status and family characteristics. Of the 30 studies we identified, nine were  
329 from the same prospective cohort study in Barbados, with many of these publications from  
330 the same cohort testing multiple cognitive, behavioural and mental health outcomes. This  
331 may have increased the likelihood of type one error. For example, different studies from the  
332 same cohort found mixed results regarding morale and personality disorder scores when  
333 different assessment tools were used (Table 3) <sup>41,43,45</sup>.

334 Impaired neurodevelopment in childhood is likely linked to subsequently poorer academic  
335 achievement in childhood and adolescence and may also be linked to increased behavioural  
336 problems seen in some studies <sup>46</sup>. The studies assessing IQ/executive function outcomes  
337 spanned childhood through to adulthood and there was moderate evidence of a link between  
338 malnutrition and cognition. Two high-quality studies showed no effect <sup>16,21</sup> and other studies  
339 which showed an effect did not adjust for any confounding variables <sup>17,28,35</sup>. There are  
340 therefore outstanding questions over how much early impairment in neurodevelopment due  
341 to malnutrition affects future cognition and functioning, and to what extent other related  
342 environmental factors such as prenatal nutrition, family characteristics and infections  
343 contribute to these outcomes <sup>47,48</sup>. Possible sex-specific differences are another area which  
344 data here does not allow us to comment on but is important for future work to explore <sup>49,50</sup>.  
345 Mental health outcomes such as depression and inattention are likely to be influenced by  
346 similar confounding variables, and whether early insults from malnutrition independently  
347 contribute to poor mental health outcomes in later life is yet to be established. There is also  
348 uncertainty around the effect of nutritional therapy on long-term cognition and functioning  
349 <sup>51</sup>. However, even if some of the effects we report are due to confounding, evidence is clear  
350 from our review that children who experience an episode of malnutrition in childhood are at  
351 high risk of poorer development, behaviour and cognition. Policy makers should therefore  
352 prioritise targeted support for these vulnerable children and programmes to optimise life  
353 chances after recovery.

354 While there is still uncertainty around the relative contributions of associated medical and  
355 social factors, there is increasing evidence from this review that the early impacts of

356 malnutrition are related to worse academic, cognitive and behavioural outcomes compared  
357 to well-nourished peers. Preventing and decreasing childhood malnutrition is therefore of key  
358 importance to prevent serious long-term neurocognitive issues in affected children,  
359 particularly given the ongoing high malnutrition prevalence in many low- and middle-income  
360 settings. Further research is needed on how to optimise treatment and to best support  
361 ongoing care for survivors to improve outcomes in the long-term.

362

### 363 **Contributions**

364 **AK, MGo, MGI, MK** conceived the study design. **AK** wrote the main draft of the paper. **AK,**  
365 **MGo, MKE, MC** screened studies against selection criteria, extracted/checked data from  
366 studies and quality scored studies. **AK, MGo** analysed and synthesized data. All authors  
367 reviewed and contributed to the manuscript.

### 368 **Funding**

369 AK is supported by a Wellcome Trust Clinical PhD Programme Fellowship (203919/Z/16/Z).

### 370 **Ethics Statement**

371 This study did not receive nor require ethics approval, as it does not involve human & animal  
372 participants

### 373 **Acknowledgements**

374 Patients and public were not involved in the design and conduct of this study

### 375 **Competing Interests**

376 None declared

377

### 378 **REFERENCES**

- 379 1 Global Nutrition Report: The state of global nutrition. (Development Initiatives, Bristol, UK,  
380 2021).  
381 2 Black, R. E. *et al.* Maternal and child undernutrition and overweight in low-income and  
382 middle-income countries. *Lancet* **382**, 427-451, doi:10.1016/s0140-6736(13)60937-x (2013).

- 383 3 Bhutta, Z. A. *et al.* Severe childhood malnutrition. *Nat Rev Dis Primers* **3**, 17067,  
384 doi:10.1038/nrdp.2017.67 (2017).
- 385 4 Grey, K. *et al.* Severe malnutrition or famine exposure in childhood and cardiometabolic  
386 non-communicable disease later in life: a systematic review. *BMJ Global Health* **6**, e003161,  
387 doi:10.1136/bmjgh-2020-003161 (2021).
- 388 5 United Nations Children's Fund (UNICEF) WHO, W. B. Levels and trends in child malnutrition:  
389 key findings of the 2021 edition of the joint child malnutrition estimates. (World Health  
390 Organization, Geneva, 2021).
- 391 6 Fergusson, P., Tomkins, A. & Kerac, M. Improving survival of children with severe acute  
392 malnutrition in HIV-prevalent settings. *Int Health* **1**, 10-16, doi:10.1016/j.inhe.2009.03.001  
393 (2009).
- 394 7 van den Heuvel, M. *et al.* Developmental and behavioural problems in children with severe  
395 acute malnutrition in Malawi: A cross-sectional study. *J Glob Health* **7**, 020416,  
396 doi:10.7189/jogh.07.020416 (2017).
- 397 8 Gladstone, M. *et al.* Assessment of neurodisability and malnutrition in children in Africa.  
398 *Semin Pediatr Neurol* **21**, 50-57, doi:10.1016/j.spen.2014.01.002 (2014).
- 399 9 Martins, V. J. *et al.* Long-lasting effects of undernutrition. *Int J Environ Res Public Health* **8**,  
400 1817-1846, doi:10.3390/ijerph8061817 (2011).
- 401 10 Pollitt, E. Developmental sequel from early nutritional deficiencies: conclusive and  
402 probability judgements. *J Nutr* **130**, 350s-353s, doi:10.1093/jn/130.2.350S (2000).
- 403 11 Grantham-McGregor, S. A review of studies of the effect of severe malnutrition on mental  
404 development. *J Nutr* **125**, 2233s-2238s, doi:10.1093/jn/125.suppl\_8.2233S (1995).
- 405 12 Page, M. J. *et al.* PRISMA 2020 explanation and elaboration: updated guidance and  
406 exemplars for reporting systematic reviews. *Bmj* **372**, n160, doi:10.1136/bmj.n160 (2021).
- 407 13 Kerac, M. *et al.* 'Severe malnutrition': thinking deeply, communicating simply. *BMJ Global  
408 Health* **5**, e003023, doi:10.1136/bmjgh-2020-003023 (2020).
- 409 14 NICE. *Quality appraisal checklist - quantitative studies reporting correlations and associations*,  
410 <[https://www.nice.org.uk/process/pmg4/chapter/appendix-g-quality-appraisal-checklist-  
411 quantitative-studies-reporting-correlations-and](https://www.nice.org.uk/process/pmg4/chapter/appendix-g-quality-appraisal-checklist-quantitative-studies-reporting-correlations-and)> (2012).
- 412 15 Campbell, M. *et al.* Synthesis without meta-analysis (SWiM) in systematic reviews: reporting  
413 guideline. *Bmj* **368**, l6890, doi:10.1136/bmj.l6890 (2020).
- 414 16 Chen, K. *et al.* Nutrition, Cognition, and Social Emotion among Preschoolers in Poor, Rural  
415 Areas of South Central China: Status and Correlates. *Nutrients* **13**, doi:10.3390/nu13041322  
416 (2021).
- 417 17 Mwene-Batu, P. *et al.* Long-term effects of severe acute malnutrition during childhood on  
418 adult cognitive, academic and behavioural development in African fragile countries: The  
419 Lwiro cohort study in Democratic Republic of the Congo. *PLoS One* **15**, e0244486,  
420 doi:10.1371/journal.pone.0244486 (2020).
- 421 18 Asiki, G., Newton, R., Marions, L., Kamali, A. & Smedman, L. The effect of childhood stunting  
422 and wasting on adolescent cardiovascular diseases risk and educational achievement in rural  
423 Uganda: a retrospective cohort study. *Glob Health Action* **12**, 1626184,  
424 doi:10.1080/16549716.2019.1626184 (2019).
- 425 19 Dwivedi, D., Singh, S., Singh, J., Bajaj, N. & Singh, H. P. Neurodevelopmental Status of  
426 Children aged 6-30 months with Severe Acute Malnutrition. *Indian Pediatr* **55**, 131-133  
427 (2018).
- 428 20 Kang, Y. *et al.* Nutritional status and risk factors for stunting in preschool children in Bhutan.  
429 *Matern Child Nutr* **14 Suppl 4**, e12653, doi:10.1111/mcn.12653 (2018).
- 430 21 Lelijveld, N. *et al.* Brain MRI and cognitive function seven years after surviving an episode of  
431 severe acute malnutrition in a cohort of Malawian children. *Public Health Nutr* **22**, 1406-  
432 1414, doi:10.1017/s1368980018003282 (2018).

- 433 22 Abessa, T. G., Bruckers, L., Kolsteren, P. & Granitzer, M. Developmental performance of  
434 hospitalized severely acutely malnourished under-six children in low- income setting. *BMC*  
435 *Pediatr* **17**, 197, doi:10.1186/s12887-017-0950-5 (2017).
- 436 23 Sudfeld, C. R. *et al.* Malnutrition and Its Determinants Are Associated with Suboptimal  
437 Cognitive, Communication, and Motor Development in Tanzanian Children. *J Nutr* **145**, 2705-  
438 2714, doi:10.3945/jn.115.215996 (2015).
- 439 24 De Grandis, E. S., Armelini, P. A. & Cuestas, E. [Evaluation of quality of life in school children  
440 with a history of early severe malnutrition]. *An Pediatr (Barc)* **81**, 368-373,  
441 doi:10.1016/j.anpedi.2013.11.021 (2014).
- 442 25 Malhi, P., Bharti, B. & Sidhu, M. Developmental Functioning of Young Indian  
443 Children with Malnutrition. *Psychol Study* **58**, 259-264, doi:10.1007/s12646-013-0194-x (2013).
- 444 26 Bogale, A. *et al.* Nutritional status and cognitive performance of mother-child pairs in  
445 Sidama, Southern Ethiopia. *Matern Child Nutr* **9**, 274-284, doi:10.1111/j.1740-  
446 8709.2011.00345.x (2013).
- 447 27 Warsito, O., Khomsan, A., Hernawati, N. & Anwar, F. Relationship between nutritional status,  
448 psychosocial stimulation, and cognitive development in preschool children in Indonesia. *Nutr*  
449 *Res Pract* **6**, 451-457, doi:10.4162/nrp.2012.6.5.451 (2012).
- 450 28 Nassar, M. F., Shaaban, S. Y., Nassar, J. F., Younis, N. T. & Abdel-Mobdy, A. E. Language skills  
451 and intelligence quotient of protein energy malnutrition survivors. *J Trop Pediatr* **58**, 226-  
452 230, doi:10.1093/tropej/fmr081 (2012).
- 453 29 Baker-Henningham, H., Hamadani, J. D., Huda, S. N. & Grantham-McGregor, S. M.  
454 Undernourished children have different temperaments than better-nourished children in  
455 rural Bangladesh. *J Nutr* **139**, 1765-1771, doi:10.3945/jn.109.106294 (2009).
- 456 30 al, H. E.-k. e. Cognitive Functions in Protein-Energy Malnutrition: In Relation to Long Chain-  
457 polyunsaturated Fatty Acids. *Pakistan Journal of Biological Sciences* **10**, 1773-1781 (2007).
- 458 31 Liu, J., Raine, A., Venables, P. H. & Mednick, S. A. Malnutrition at age 3 years and  
459 externalizing behavior problems at ages 8, 11, and 17 years. *Am J Psychiatry* **161**, 2005-2013,  
460 doi:10.1176/appi.ajp.161.11.2005 (2004).
- 461 32 Liu, J., Raine, A., Venables, P. H., Dalais, C. & Mednick, S. A. Malnutrition at age 3 years and  
462 lower cognitive ability at age 11 years: independence from psychosocial adversity. *Arch*  
463 *Pediatr Adolesc Med* **157**, 593-600, doi:10.1001/archpedi.157.6.593 (2003).
- 464 33 Drewett, R., Wolke, D., Asefa, M., Kaba, M. & Tessema, F. Malnutrition and mental  
465 development: is there a sensitive period? A nested case-control study. *J Child Psychol*  
466 *Psychiatry* **42**, 181-187, doi:10.1111/1469-7610.00709 (2001).
- 467 34 Vazir, S., Naidu, A. N. & Vidyasagar, P. Nutritional status, psychosocial development and the  
468 home environment of Indian rural children. *Indian Pediatr* **35**, 959-966 (1998).
- 469 35 Perales, C. G., Heresi, E., Pizarro, F. & Colombo, M. [Cognitive functions of school children  
470 with normal IQ and histories of severe and early malnutrition]. *Arch Latinoam Nutr* **46**, 282-  
471 286 (1996).
- 472 36 Meeta, K. & I.J.S, J. Malnutrition and Mental Development during Infancy. *J. Dairying, Foods*  
473 *& Home Sci.*, **14**, 159-165 (1995).
- 474 37 Hock, R. S. *et al.* Childhood malnutrition and maltreatment are linked with personality  
475 disorder symptoms in adulthood: Results from a Barbados lifespan cohort. *Psychiatry Res*  
476 **269**, 301-308, doi:10.1016/j.psychres.2018.05.085 (2018).
- 477 38 Waber, D. P. *et al.* Impaired IQ and academic skills in adults who experienced moderate to  
478 severe infantile malnutrition: a 40-year study. *Nutr Neurosci* **17**, 58-64,  
479 doi:10.1179/1476830513y.0000000061 (2014).
- 480 39 Waber, D. P. *et al.* Neuropsychological outcomes at midlife following moderate to severe  
481 malnutrition in infancy. *Neuropsychology* **28**, 530-540, doi:10.1037/neu0000058 (2014).
- 482 40 Galler, J. R. *et al.* Malnutrition in the first year of life and personality at age 40. *J Child*  
483 *Psychol Psychiatry* **54**, 911-919, doi:10.1111/jcpp.12066 (2013).

- 484 41 Galler, J. R. *et al.* Infant malnutrition is associated with persisting attention deficits in middle  
485 adulthood. *J Nutr* **142**, 788-794, doi:10.3945/jn.111.145441 (2012).
- 486 42 Galler, J. R. *et al.* Infant malnutrition predicts conduct problems in adolescents. *Nutr*  
487 *Neurosci* **15**, 186-192, doi:10.1179/1476830512y.0000000012 (2012).
- 488 43 Waber, D. P. *et al.* Cognitive impairment as a mediator in the developmental pathway from  
489 infant malnutrition to adolescent depressive symptoms in Barbadian youth. *J Dev Behav*  
490 *Pediatr* **32**, 225-232, doi:10.1097/DBP.0b013e31820b7707 (2011).
- 491 44 Galler, J. R. *et al.* Early malnutrition predicts parent reports of externalizing behaviors at ages  
492 9-17. *Nutr Neurosci* **14**, 138-144, doi:10.1179/147683011x13009738172521 (2011).
- 493 45 Galler, J. R. *et al.* Early childhood malnutrition predicts depressive symptoms at ages 11-17. *J*  
494 *Child Psychol Psychiatry* **51**, 789-798, doi:10.1111/j.1469-7610.2010.02208.x (2010).
- 495 46 Krebs, N. F., Lozoff, B. & Georgieff, M. K. Neurodevelopment: The Impact of Nutrition and  
496 Inflammation During Infancy in Low-Resource Settings. *Pediatrics* **139**, S50-s58,  
497 doi:10.1542/peds.2016-2828G (2017).
- 498 47 Germine, L., Dunn, E. C., McLaughlin, K. A. & Smoller, J. W. Childhood Adversity Is Associated  
499 with Adult Theory of Mind and Social Affiliation, but Not Face Processing. *PLoS One* **10**,  
500 e0129612, doi:10.1371/journal.pone.0129612 (2015).
- 501 48 McLaughlin, K. A., Weissman, D. & Bitrán, D. Childhood Adversity and Neural Development:  
502 A Systematic Review. *Annu Rev Dev Psychol* **1**, 277-312, doi:10.1146/annurev-devpsych-  
503 121318-084950 (2019).
- 504 49 Shapiro, J. R., Klein, S. L. & Morgan, R. Stop 'controlling' for sex and gender in global health  
505 research. *BMJ Global Health* **6**, e005714, doi:10.1136/bmjgh-2021-005714 (2021).
- 506 50 Thurstans, S. *et al.* Boys are more likely to be undernourished than girls: a systematic review  
507 and meta-analysis of sex differences in undernutrition. *BMJ Global Health* **5**, e004030,  
508 doi:10.1136/bmjgh-2020-004030 (2020).
- 509 51 Stephenson, K. *et al.* Low linoleic acid foods with added DHA given to Malawian children  
510 with severe acute malnutrition improve cognition: a randomized, triple blinded, controlled  
511 clinical trial. *Am J Clin Nutr*, doi:10.1093/ajcn/nqab363 (2021).

512

513

514

515

516

517

518

519



**Table 1: Summary of results from studies assessing the effect of malnutrition on neurodevelopment**

| Study (quality)<br><b>Country</b>              | Neurodevelopmental assessment tool |                         |                      |                         |                        |
|------------------------------------------------|------------------------------------|-------------------------|----------------------|-------------------------|------------------------|
|                                                | BSID                               | MICS<br>ECDI            | Denver               | IDI                     | ICMR                   |
| Dwivedi et al 2018 (+)<br><b>India</b>         | Effect<br>(unadjusted)*            |                         |                      |                         |                        |
| Kang et al 2018 (+)<br><b>multiple in Asia</b> |                                    | No effect<br>(adjusted) |                      |                         |                        |
| Abessa et al 2017 (++)<br><b>Ethiopia</b>      |                                    |                         | Effect<br>(adjusted) |                         |                        |
| Sudfeld et al 2015 (++)<br><b>Tanzania</b>     | Effect<br>(adjusted)               |                         |                      |                         |                        |
| Malhi et al 2013 (-)<br><b>India</b>           |                                    |                         |                      | No effect<br>(adjusted) |                        |
| El-Khayat et al 2007 (+)<br><b>Egypt</b>       | Effect<br>(unadjusted)             |                         |                      |                         |                        |
| Drewett et al 2001 (++)<br><b>Ethiopia</b>     | No effect<br>(adjusted)            |                         |                      |                         |                        |
| Vazir et al 1998 (+)<br><b>India</b>           |                                    |                         |                      |                         | Effect<br>(unadjusted) |
| Kaul et al 1995 (+)<br><b>India</b>            | Effect<br>(unadjusted)             |                         |                      |                         |                        |

\* Indian modification of BSID

Effect - statistically significant difference in neurodevelopment between cases and controls

No effect – no difference, or statistically insignificant difference, or statistically insignificant difference after adjusting for confounding variables, in neurodevelopment between cases and controls

Adjusted – results adjusted for confounding variables

Unadjusted – results unadjusted for confounding variables

++ = high-quality

+ = adequate-quality

- = poor-quality

BSID – Bayley Scales of Infant Development, IDI – Indian Developmental Inventory, ICMR – Indian Council Medical Research Psychosocial Developmental Screening Test, MICS ECDI – Multiple Indicator Cluster Survey Early Child Development Index

**Table 2: Summary of results from studies assessing the effect of malnutrition on cognition and academic achievement**

| Study (quality)<br>[outcome age]<br><b>Country</b>                  | School, academic or language performance | Executive function/ Intelligence [assessment tool]                                                           |
|---------------------------------------------------------------------|------------------------------------------|--------------------------------------------------------------------------------------------------------------|
| Chen <i>et al</i> 2021 (++)<br>[childhood]<br><b>China</b>          |                                          | No effect (adjusted)<br>[WPPSI-IV]                                                                           |
| Mwene-Batu <i>et al</i> 2020 (+)<br>[adulthood]<br><b>DRC</b>       | Effect (unadjusted)                      | Effect (unadjusted)<br>[MMSE]                                                                                |
| Asiki <i>et al</i> 2018 (++)<br>[adolescence]<br><b>Uganda</b>      | Effect (adjusted)                        |                                                                                                              |
| Lelijveld <i>et al</i> 2018 (++)<br>[childhood]<br><b>Malawi</b>    | Effect (adjusted)                        | No effect (adjusted)<br>[CANTAB]                                                                             |
| Bogale <i>et al</i> 2013 (++)<br>[childhood]<br><b>Ethiopia</b>     |                                          | Effect (adjusted)<br>[Raven's CPM, KABC-II]                                                                  |
| Warsito <i>et al</i> 2012 (-)<br>[childhood]<br><b>Indonesia</b>    |                                          | No effect (unadjusted)<br>[Indonesian Department of National Education – child development instrument score] |
| Nassar <i>et al</i> 2012 (-)<br>[childhood]<br><b>Egypt</b>         | Effect (unadjusted)                      | Effect (unadjusted)<br>[Stanford-Binet-Intelligence-Scale]                                                   |
| Liu <i>et al</i> 2003 (++)<br>[adolescence]<br><b>Mauritius</b>     | Effect (adjusted)                        | Effect (adjusted)<br>[Bohem Test, Trail Making Test, WISC]                                                   |
| Perales <i>et al</i> 1996 (+)<br>[childhood]<br><b>Chile</b>        |                                          | Effect (unadjusted)<br>[Continuous Performance Task, Anstey Domino test]                                     |
| <b>Barbados Nutrition Study</b>                                     |                                          |                                                                                                              |
| Waber (1) <i>et al</i> 2014* (++)<br>[adulthood]<br><b>Barbados</b> | Effect (adjusted)                        | Effect (adjusted)<br>[WASI]                                                                                  |
| Waber (2) <i>et al</i> 2014* (++)<br>[adulthood]<br><b>Barbados</b> |                                          | Effect (adjusted)<br>[WAIS-III, D-KEFS, WRAML-2, Wisconsin card sorting, Metacognitive index]                |
| Waber <i>et al</i> 2011* (+)<br>[adolescence]<br><b>Barbados</b>    | Effect (adjusted)                        | Effect (adjusted)<br>[WISC]                                                                                  |

\*Studies are drawn from the same Barbados Nutrition Study

Effect - statistically significant difference in academic achievement/cognition between cases and controls

No effect –no difference, or statistically insignificant difference, or statistically insignificant difference after adjusting for confounding variables, in academic achievement/cognition between cases and controls

Adjusted – results adjusted for confounding variables

Unadjusted – results unadjusted for confounding variables

++ = high-quality

+ = adequate-quality

- = poor-quality

CANTAB – Cambridge Neuropsychological Test Automated Battery, D-KEFS – Delis-Kaplan Executive Function System, KABC-II – Kaufman Assessment Battery for Children-II, MMSE – Mini-Mental State Exam, Raven’s CPM – Raven’s Colored Progressive Matrices, WAIS-III – Wechsler Adult Intelligence Scale-III, WASI – Adult IQ: Wechsler Abbreviated Scale of Intelligence – Vocabulary and Matrix Reasoning subsets, WISC – Weschler Intelligence Scale for Children, WPPSI-IV – Wechsler Preschool and Primary Scale of Intelligence Fourth Edition, WRAML-II – Wide Range Assessment of Memory and Learning-II

Table 3: Summary of results from studies assessing the effect of malnutrition on mental health and behaviour

| Study<br>(quality)<br>[outcome age]<br><b>Country</b>                       | Behavioural<br>problems<br>[tool]                               | Self-esteem<br>[tool]                                       | Social-related<br>disability<br>[tool] | Quality of life<br>[tool]                                              | Personality<br>[tool] | Attention<br>[tool] | Morale<br>[tool] |
|-----------------------------------------------------------------------------|-----------------------------------------------------------------|-------------------------------------------------------------|----------------------------------------|------------------------------------------------------------------------|-----------------------|---------------------|------------------|
| Chen <i>et al</i> 2021<br>(++)<br>[childhood]<br><b>China</b>               | No effect<br>(adjusted)<br>[SDQ]                                |                                                             |                                        |                                                                        |                       |                     |                  |
| Mwene-Batu et al<br>2020 (+)<br>[adulthood]<br><b>DRC</b>                   |                                                                 | Effect<br>(unadjusted)<br>[Rosenberg Self-<br>Esteem Scale] | No effect<br>(unadjusted)<br>[WHODAS]  |                                                                        |                       |                     |                  |
| Abessa et al<br>2017 (++)<br>[childhood]<br><b>Ethiopia</b>                 | Effect<br>(adjusted)<br>[ASQ:SE]                                |                                                             |                                        |                                                                        |                       |                     |                  |
| De Grandis et al<br>2014 (-)<br>[childhood]<br><b>Argentina</b>             |                                                                 |                                                             |                                        | Effect<br>(unadjusted)<br>[Paediatric<br>quality of life<br>inventory] |                       |                     |                  |
| Baker-<br>Henningham et al<br>2009 (++)<br>[childhood]<br><b>Bangladesh</b> | Effect<br>(adjusted)<br>[Wachs<br>temperament<br>questionnaire] |                                                             |                                        |                                                                        |                       |                     |                  |
| Liu et al 2004 (+)<br>[childhood,<br>adolescence]<br><b>Mauritius</b>       | Effect<br>(adjusted)<br>[Child Behaviour<br>Checklist]          |                                                             |                                        |                                                                        |                       |                     |                  |
| Barbados Nutrition Study                                                    |                                                                 |                                                             |                                        |                                                                        |                       |                     |                  |

|                                                                   |                                                                                     |  |  |  |                                                      |                                             |                                                                          |
|-------------------------------------------------------------------|-------------------------------------------------------------------------------------|--|--|--|------------------------------------------------------|---------------------------------------------|--------------------------------------------------------------------------|
| Hock et al 2018*<br>(+)<br>[adulthood]<br><b>Barbados</b>         |                                                                                     |  |  |  | Mixed<br>(adjusted)<br>[SCID-II-PQ,<br>NEO PI-R FFM] |                                             |                                                                          |
| Waber (2) et al<br>2014* (++)<br>[adulthood]<br><b>Barbados</b>   | Effect<br>(adjusted)<br>[Behavioural<br>regulation index]                           |  |  |  |                                                      |                                             |                                                                          |
| Galler et al<br>2013* (+)<br>[adulthood]<br><b>Barbados</b>       |                                                                                     |  |  |  | Effect<br>(adjusted)<br>[NEO-PI-R]                   |                                             |                                                                          |
| Galler (1) et al<br>2012* (+)<br>[adulthood]<br><b>Barbados</b>   |                                                                                     |  |  |  |                                                      | Mixed (adjusted)<br>[CAARS, CPT]            |                                                                          |
| Galler (2) et al<br>2012* (+)<br>[adolescence]<br><b>Barbados</b> | No effect<br>(adjusted)<br>[Conduct: CBQ,<br>Teacher<br>behaviour<br>questionnaire] |  |  |  |                                                      |                                             |                                                                          |
| Waber et al<br>2011* (+)<br>[adolescence]<br><b>Barbados</b>      |                                                                                     |  |  |  |                                                      | No effect<br>(adjusted)<br>[Attention: CBQ] | No effect<br>(adjusted)<br>[Minnesota<br>Adjustment and<br>Morale Scale] |
| Galler et al<br>2011* (++)<br>[adolescence]<br><b>Barbados</b>    | Effect<br>(adjusted)<br>[BCBS]                                                      |  |  |  |                                                      |                                             |                                                                          |
| Galler et al<br>2010* (++)                                        |                                                                                     |  |  |  |                                                      |                                             | Effect                                                                   |

|                                  |  |  |  |  |  |  |                                                             |
|----------------------------------|--|--|--|--|--|--|-------------------------------------------------------------|
| [adolescence]<br><b>Barbados</b> |  |  |  |  |  |  | (adjusted)<br>[Minnesota<br>Adjustment and<br>Morale Scale] |
|----------------------------------|--|--|--|--|--|--|-------------------------------------------------------------|

\*Studies are drawn from the same Barbados Nutrition Study

Effect - statistically significant difference in mental health/behavior between cases and controls

No effect –no difference, or statistically insignificant difference, or statistically insignificant difference after adjusting for confounding variables, in mental health/behaviour between cases and controls

Adjusted – results adjusted for confounding variables

Unadjusted – results unadjusted for confounding variables

++ = high-quality

+ = adequate-quality

- = poor-quality

ASQ:SE – Ages and Stages Questionnaire Socio emotional, BCBS – Barbados Child Behaviour Scale, CAARS - Attention-domain: Conners-ADHD-Rating-Scales, CBQ – Child Behaviour Questionnaire, CPT – Conners-Continuous-Performance Test, NEO PI-R – NEO Personality Inventory-Revised, NEO PI-R FFM – NEO Personality Inventory-Revised derived Five-Factor Model, SCID-II-PQ – Structured Clinical Interview for DSM-IV Axis II Personality Disorders Personality Questionnaire, SDQ – Strengths and Difficulties Questionnaire, WHODAS – World Health Organization Disability Assessment Schedule

## Supplementary Appendix 1 – Search strategies

### **EMBASE**

1. severe acute malnutrition.ti,ab.
2. acute severe malnutrition.ti,ab.
3. acute malnutrition.ti,ab.
4. (acute adj2 malnutrition).ti,ab.
5. "sever\* acute\* maln\*".ti,ab.
6. protein-energy malnutrition.ti,ab.
7. protein calorie malnutrition.ti,ab.
8. (protein malnutrition or energy malnutrition or energy-protein malnutrition).ti,ab.
9. "acute\* maln\*".ti,ab.
10. "kwas?io?kor\*".ti,ab.
11. "marasm\*".ti,ab.
12. "marasm\* kwas?io?kor\*".ti,ab.
13. wasting.ti,ab.
14. "acute wast\*".ti,ab.
15. wasted.ti,ab.
16. (acute adj2 wasting).ti,ab.
17. (severe adj2 wasting).ti,ab.
18. acute undernutrition.ti,ab.
19. (acute adj2 undernutrition).ti,ab.
20. severe undernutrition.ti,ab.
21. (severe adj2 undernutrition).ti,ab.
22. "mid\* upper arm circumference".ti,ab.
23. (mid\* upper arm circumference adj "115").ti,ab.
24. (mid\* upper arm circumference adj "110").ti,ab.



25. MUAC.ti,ab.
26. "acute\* undernourish\*".ti,ab.
27. "acut\* emaciat\*".ti,ab.
28. "acut\* maln\*".ti,ab.
29. \*malnutrition/
30. exp kwashiorkor/
31. exp marasmus/
32. exp wasting syndrome/
33. exp protein calorie malnutrition/
34. \*nutritional disorder/
35. 1 or 2 or 3 or 4 or 5 or 6 or 7 or 8 or 9 or 10 or 11 or 12 or 13 or 14 or 15 or 16 or 17 or 18 or 19 or 20 or 21 or 22 or 23 or 24 or 25 or 26 or 27 or 28 or 29 or 30 or 31 or 32 or 33 or 34
36. infant/
37. child/
38. exp toddler/
39. "child\*".ti,ab.
40. "infan\*".ti,ab.
41. "pre-school\*".ti,ab.
42. "preschool\*".ti,ab.
43. "toddler\*".ti,ab.
44. 36 or 37 or 38 or 39 or 40 or 41 or 42 or 43
45. 35 and 44
46. "child\* developm\* ".ti,ab.
47. "child\* neurodevelopm\*".ti,ab.
48. "neurodevelopm\*".ti,ab.
49. (socio-emotion\* develop\* or socioemotion\* develop\*).ti,ab.

50. "social developm\*".ti,ab.
51. "emotion\* developm\*".ti,ab.
52. (sensorymotor developm\* or sensory-motor developm\*).ti,ab.
53. "motor developm\*".ti,ab.
54. "motor neurodevelopm\*".ti,ab.
55. exp child development/ or exp postnatal development/
56. 46 or 47 or 48 or 49 or 50 or 51 or 52 or 53 or 54 or 55
57. exp cognition assessment/ or exp cognition/
58. exp learning/ or exp learning disorder/
59. exp intelligence quotient/ or exp intelligence/
60. exp language development/ or exp human development/ or exp mental development/
61. \*brain function/ or \*central nervous system function/
62. cognition.ti,ab.
63. "cogniti\* performance".ti,ab.
64. intelligence.ti,ab.
65. IQ.ti,ab.
66. "executive function\*".ti,ab.
67. reasoning.ti,ab.
68. language.ti,ab.
69. attention.ti,ab.
70. memory.ti,ab.
71. memory.ti,ab.
72. learning.ti,ab.
73. early learning.ti,ab.
74. information processing.ti,ab.
75. literacy.ti,ab.

76. reading.ti,ab.
77. math.ti,ab.
78. 57 or 58 or 59 or 60 or 61 or 62 or 63 or 64 or 65 or 66 or 67 or 69 or 70 or 71 or 72 or 73 or 74 or 75 or 76 or 77
79. education.ti,ab.
80. "school\* achievement".ti,ab.
81. "school\* performance".ti,ab.
82. school retention.ti,ab.
83. academic.ti,ab.
84. pre-academic.ti,ab.
85. schooling.ti,ab.
86. exp academic achievement/
87. 79 or 80 or 81 or 82 or 83 or 84 or 85 or 86
88. exp behavior/
89. exp mental health/
90. exp psychological aspect/ or exp neuropsychology/ or exp attention/ or exp cognitive defect/ or exp mental disease/
91. exp depression/
92. \*hyperactivity/ or \*psychomotor disorder/
93. exp attention deficit disorder/
94. "behavior\* problem".ti,ab.
95. "emotion\* problem".ti,ab.
96. "temperament".ti,ab.
97. self regulation.ti,ab.
98. attachment.ti,ab.
99. self esteem.ti,ab.
100. self efficacy.ti,ab.
101. "social competen".ti,ab.

102. "peer relationship\*".ti,ab.
103. pro-social behavi?r.ti,ab.
104. hyperactivity.ti,ab.
105. impulsivity.ti,ab.
106. attention\* deficit hyperactivity disorder\*.ti,ab.
107. agresion.ti,ab.
108. 88 or 89 or 90 or 91 or 92 or 93 or 94 or 95 or 96 or 97 or 98 or 99 or 100 or 101 or 102 or 103 or 104 or 105 or 106 or 107
109. 56 or 78 or 90 or 108
110. 45 and 109
111. limit 110 to (human and yr="1995 -Current")

## **MEDLINE**

1. "acute severe malnutrition".ti,ab.
2. severe acute malnutrition.ti,ab.
3. acute malnutrition.ti,ab.
4. (acute adj2 malnutrition).ti,ab.
5. "sever\* acute\* maln\*".ti,ab.
6. protein-energy malnutrition.ti,ab.
7. acute severe malnutrition.ti,ab.
8. (protein malnutrition or energy malnutrition or energy-protein malnutrition).ti,ab.
9. "acute\* maln\*".ti,ab.
10. "kwas?io?kor\*".ti,ab.
11. "marasm\*".ti,ab.
12. "marasm\* kwas?io?kor\*".ti,ab.
13. wasting.ti,ab.

14. "acute wast\*".ti,ab.
15. wasted.ti,ab.
16. (acute adj2 wasting).ti,ab.
17. (severe adj2 wasting).ti,ab.
18. acute undernutrition.ti,ab.
19. (acute adj2 undernutrition).ti,ab.
20. severe undernutrition.ti,ab.
21. (severe adj2 undernutrition).ti,ab.
22. "mid\* upper arm circumference".ti,ab.
23. (mid\* upper arm circumference adj "115").ti,ab.
24. (mid\* upper arm circumference adj "110").ti,ab.
25. MUAC.ti,ab.
26. "acute\* undernourish\*".ti,ab.
27. "acut\* maln\*".ti,ab.
28. exp child nutrition disorders/ or exp deficiency diseases/ or exp starvation/ or \*wasting syndrome/
29. exp Protein-Energy Malnutrition/
30. exp Infant Nutrition Disorders/
31. 1 or 2 or 3 or 4 or 5 or 6 or 7 or 8 or 9 or 10 or 11 or 12 or 13 or 14 or 15 or 16 or 17 or 18 or 19 or 20 or 21 or 22 or 23 or 24 or 25 or 26 or 27 or 28 or 29 or 30
32. "child\*".ti,ab.
33. "infan\*".ti,ab.
34. "pre-school\*".ti,ab.
35. "preschool\*".ti,ab.
36. "toddler\*".ti,ab.
37. exp Infant/
38. exp Child/

39. Child, Preschool/
40. 32 or 33 or 34 or 35 or 36 or 37 or 38 or 39
41. 31 and 40
42. "child\* developm\* ".ti,ab.
43. "child\* neurodevelopm\*".ti,ab.
44. "neurodevelopm\*".ti,ab.
45. (socio-emotion\* develop\* or socioemotion\* develop\*).ti,ab.
46. "social developm\*".ti,ab.
47. "emotion\* developm\*".ti,ab.
48. (sensorymotor developm\* or sensory-motor developm\*).ti,ab.
49. "motor developm\*".ti,ab.
50. "motor neurodevelopm\*".ti,ab.
51. exp Child Development/
52. 42 or 43 or 44 or 45 or 46 or 47 or 48 or 49 or 50 or 51
53. cognition.ti,ab.
54. "cogniti\* performance".ti,ab.
55. intelligence.ti,ab.
56. IQ.ti,ab.
57. "executive function\*".ti,ab.
58. reasoning.ti,ab.
59. language.ti,ab.
60. attention.ti,ab.
61. memory.ti,ab.
62. learning.ti,ab.
63. early learning.ti,ab.
64. information processing.ti,ab.

65. literacy.ti,ab.
66. reading.ti,ab.
67. math.ti,ab.
68. \*cognition/ or exp cognitive reserve/ or exp comprehension/ or exp executive function/ or exp learning/
69. exp Mild Cognitive Impairment/
70. \*Intelligence/
71. \*language development/ or \*child language/
72. 53 or 54 or 55 or 56 or 57 or 58 or 59 or 60 or 61 or 62 or 63 or 64 or 65 or 66 or 67 or 68 or 69 or 70 or 71
73. education.ti,ab.
74. "school\* achievement".ti,ab.
75. "school\* performance".ti,ab.
76. school retention.ti,ab.
77. academic.ti,ab.
78. pre-academic.ti,ab.
79. schooling.ti,ab.
80. exp Educational Status/
81. 73 or 74 or 75 or 76 or 77 or 78 or 79 or 80
82. "behavi?r\* problem\*".ti,ab.
83. "emotion\* problem\*".ti,ab.
84. "temperament\*".ti,ab.
85. self regulation.ti,ab.
86. attachment.ti,ab.
87. self esteem.ti,ab.
88. self efficacy.ti,ab.
89. "social competen\*".ti,ab.
90. "peer relationship\*".ti,ab.

91. pro-social behavi?r.ti,ab.
92. hyperactivity.ti,ab.
93. impulsivity.ti,ab.
94. attention\* deficit hyperactivity disorder\*.ti,ab.
95. aggression.ti,ab.
96. exp Child Behavior Disorders/
97. exp Mental Health/
98. \*psychology/ or exp psychology, adolescent/ or exp psychology, child/
99. exp Depression/
100. exp Attention Deficit Disorder with Hyperactivity/
101. \*Anxiety Disorders/
102. 82 or 83 or 84 or 85 or 86 or 87 or 88 or 89 or 90 or 91 or 92 or 93 or 94 or 95 or 96 or 97 or 98 or 99 or 100 or 101
103. 52 or 72 or 81 or 102
104. 41 and 103
105. limit 104 to (humans and yr="1995 -Current")

## **GLOBAL HEALTH**

1. severe acute malnutrition.ti,ab.
2. acute severe malnutrition.ti,ab.
3. acute malnutrition.ti,ab.
4. (acute adj2 malnutrition).ti,ab.
5. "sever\* acute\* maln\*".ti,ab.
6. protein-energy malnutrition.ti,ab.
7. protein calorie malnutrition.ti,ab.
8. (protein malnutrition or energy malnutrition or energy-protein malnutrition).ti,ab.



9. "acute\* maln\*".ti,ab.
10. "kwas?io?kor\*".ti,ab.
11. "marasm\*".ti,ab.
12. "marasm\* kwas?io?kor\*".ti,ab.
13. wasting.ti,ab.
14. "acute wast\*".ti,ab.
15. wasted.ti,ab.
16. (acute adj2 wasting).ti,ab.
17. (severe adj2 wasting).ti,ab.
18. acute undernutrition.ti,ab.
19. (acute adj2 undernutrition).ti,ab.
20. severe undernutrition.ti,ab.
21. (severe adj2 undernutrition).ti,ab.
22. "mid\* upper arm circumference".ti,ab.
23. (mid\* upper arm circumference adj "115").ti,ab.
24. (mid\* upper arm circumference adj "110").ti,ab.
25. MUAC.ti,ab.
26. "acute\* undernourish\*".ti,ab.
27. "acut\* maln\*".ti,ab.
28. emaciat\*.ti,ab.
29. nutritional disorders/ or malnutrition/ or exp protein energy malnutrition/ or exp undernutrition/ or exp nutritional oedema/
30. wasting disease/ or exp emaciation/
31. 1 or 2 or 3 or 4 or 5 or 6 or 7 or 8 or 9 or 10 or 11 or 12 or 13 or 14 or 15 or 16 or 17 or 18 or 19 or 20 or 21 or 22 or 23 or 24 or 25 or 26 or 27 or 28 or 29 or 30
32. "child\*".ti,ab.
33. "infan\*".ti,ab.

34. "pre-school\*".ti,ab.
35. "preschool\*".ti,ab.
36. "toddler\*".ti,ab.
37. exp infants/
38. exp preschool children/ or children/
39. 32 or 33 or 34 or 35 or 36 or 37 or 38
40. 31 and 39
41. "child\* developm\* ".ti,ab.
42. "child\* neurodevelopm\*".ti,ab.
43. "neurodevelopm\*".ti,ab.
44. (socio-emotion\* develop\* or socioemotion\* develop\*).ti,ab.
45. "social developm\*".ti,ab.
46. "emotion\* developm\*".ti,ab.
47. (sensorymotor developm\* or sensory-motor developm\*).ti,ab.
48. "motor developm\*".ti,ab.
49. child development/ or exp early childhood development/ or exp infant development/ or exp psychomotor development/
50. 41 or 42 or 43 or 44 or 45 or 46 or 47 or 48 or 49
51. cognition.ti,ab.
52. "cogniti\* performance".ti,ab.
53. intelligence.ti,ab.
54. IQ.ti,ab.
55. "executive function\*".ti,ab.
56. reasoning.ti,ab.
57. language.ti,ab.
58. attention.ti,ab.
59. memory.ti,ab.

60. learning.ti,ab.
61. early learning.ti,ab.
62. information processing.ti,ab.
63. literacy.ti,ab.
64. reading.ti,ab.
65. math.ti,ab.
66. exp mental ability/ or exp cognitive development/ or exp memory/
67. exp learning/
68. 51 or 52 or 53 or 54 or 55 or 56 or 57 or 58 or 59 or 60 or 61 or 62 or 63 or 64 or 65 or 66 or 67
69. education.ti,ab.
70. "school\* achievement".ti,ab.
71. "school\* performance".ti,ab.
72. school retention.ti,ab.
73. academic.ti,ab.
74. schooling.ti,ab.
75. preacademic.ti,ab.
76. education/ or exp early childhood education/ or exp elementary education/ or exp extension education/ or exp higher education/ or exp primary education/ or exp professional education/ or exp secondary education/ or exp academic achievement/ or exp educational performance/
77. 69 or 70 or 71 or 72 or 73 or 74 or 75 or 76
78. "behavi?r\* problem\*".ti,ab.
79. "emotion\* problem\*".ti,ab.
80. "temperament\*".ti,ab.
81. self regulation.ti,ab.
82. attachment.ti,ab.
83. self esteem.ti,ab.

84. self efficacy.ti,ab.
85. "social competen\*".ti,ab.
86. "peer relationship\*".ti,ab.
87. pro-social behavi?.ti,ab.
88. hyperactivity.ti,ab.
89. impulsivity.ti,ab.
90. attention\* deficit hyperactivity disorder\*.ti,ab.
91. aggression.ti,ab.
92. exp mental health/ or exp mental disorders/
93. depression/
94. psychology/ or exp adolescent development/ or exp adult development/ or exp emotional development/ or exp self esteem/ or exp self reliance/
95. exp attention deficit hyperactivity disorder/
96. 78 or 79 or 80 or 81 or 82 or 83 or 84 or 85 or 86 or 87 or 88 or 89 or 90 or 91 or 92 or 93 or 94 or 95
97. 50 or 68 or 77 or 96
98. 40 and 97
99. limit 98 to yr="1995 -Current"

### **PsycINFO**

1. severe acute malnutrition.ti,ab.
2. acute malnutrition.ti,ab.
3. (acute adj2 malnutrition).ti,ab.
4. "sever\* acute\* maln\*".ti,ab.
5. protein-energy malnutrition.ti,ab.
6. protein calorie malnutrition.ti,ab.

7. (protein malnutrition or energy malnutrition or energy-protein malnutrition).ti,ab.
8. "acute\* maln\*".ti,ab.
9. "kwas?io?kor\*".ti,ab.
10. "marasm\*".ti,ab.
11. "marasm\* kwas?io?kor\*".ti,ab.
12. wasting.ti,ab.
13. wasted.ti,ab.
14. (acute adj2 wasting).ti,ab.
15. (severe adj2 wasting).ti,ab.
16. acute undernutrition.ti,ab.
17. (acute adj2 undernutrition).ti,ab.
18. severe undernutrition.ti,ab.
19. (severe adj2 undernutrition).ti,ab.
20. "mid\* upper arm circumference".ti,ab.
21. MUAC.ti,ab.
22. "acute\* undernourish\*".ti,ab.
23. "emaciat\*".ti,ab.
24. "acut\* maln\*".ti,ab.
25. nutritional deficiencies/ or protein deficiency disorders/ or exp failure to thrive/ or exp underweight/
26. exp Kwashiorkor/
27. \*protein deficiency disorders/
28. 1 or 2 or 3 or 4 or 5 or 6 or 7 or 8 or 9 or 10 or 11 or 12 or 13 or 14 or 15 or 16 or 17 or 18 or 19 or 20 or 21 or 22 or 23 or 24 or 25 or 26 or 27
29. "child\*".ti,ab.
30. "infan\*".ti,ab.
31. "pre-school\*".ti,ab.

32. "preschool\*".ti,ab.
33. "toddler\*".ti,ab.
34. 29 or 30 or 31 or 32 or 33
35. 28 and 34
36. "child\* developm\* ".ti,ab.
37. "child\* neurodevelopm\*".ti,ab.
38. "neurodevelopm\*".ti,ab.
39. (socio-emotion\* develop\* or socioemotion\* develop\*).ti,ab.
40. "social developm\*".ti,ab.
41. "emotion\* developm\*".ti,ab.
42. (sensorymotor developm\* or sensory-motor developm\*).ti,ab.
43. "motor developm\*".ti,ab.
44. "motor neurodevelopm\*".ti,ab.
45. psychomotor developm\*.ti,ab.
46. exp infant development/ or exp early childhood development/
47. \*childhood development/ or exp early childhood development/ or exp motor development/ or exp psychological development/ or exp psychomotor development/
48. exp emotional development/ or exp psychological development/
49. 36 or 37 or 38 or 39 or 40 or 41 or 42 or 43 or 44 or 45 or 46 or 47 or 48
50. cognition.ti,ab.
51. "cogniti\* performance".ti,ab.
52. intelligence.ti,ab.
53. IQ.ti,ab.
54. "executive function\*".ti,ab.
55. reasoning.ti,ab.
56. language.ti,ab.

57. attention.ti,ab.
58. memory.ti,ab.
59. learning.ti,ab.
60. early learning.ti,ab.
61. information processing.ti,ab.
62. literacy.ti,ab.
63. reading.ti,ab.
64. math.ti,ab.
65. \*cognitive processes/ or exp cognitive assessment/ or exp learning/ or exp memory/ or exp neurocognition/
66. \*learning/ or adult learning/ or problem based learning/ or school learning/ or skill learning/ or verbal learning/
67. exp Fine Motor Skill Learning/ or exp Learning Disabilities/ or exp Learning Disorders/ or exp Gross Motor Skill Learning/
68. \*language disorders/ or \*specific language impairment/ or exp language delay/ or exp language development/
69. \*cognitive development/ or exp brain development/ or exp speech development/
70. \*cognition/ or exp cognitive impairment/
71. \*intelligence/ or exp intellectual development/ or exp intelligence quotient/
72. 50 or 51 or 52 or 53 or 54 or 55 or 56 or 57 or 58 or 59 or 60 or 61 or 62 or 63 or 64 or 65 or 66 or 67 or 68 or 69 or 70 or 71
73. education.ti,ab.
74. "school\* achievement".ti,ab.
75. "school\* performance".ti,ab.
76. school retention.ti,ab.
77. academic.ti,ab.
78. pre-academic.ti,ab.
79. schooling.ti,ab.
80. \*education/
81. education/ or exp academic achievement/ or exp school attendance/ or exp school dropouts/ or exp school learning/
82. 73 or 74 or 75 or 76 or 77 or 78 or 79 or 80 or 81

83. "behavi?r\* problem\*".ti,ab.
84. "emotion\* problem\*".ti,ab.
85. "temperament\*".ti,ab.
86. self regulation.ti,ab.
87. attachment.ti,ab.
88. self esteem.ti,ab.
89. self efficacy.ti,ab.
90. "social competen\*".ti,ab.
91. "peer relationship\*".ti,ab.
92. pro-social behavi?r.ti,ab.
93. hyperactivity.ti,ab.
94. impulsivity.ti,ab.
95. attention\* deficit hyperactivity disorder\*.ti,ab.
96. aggression.ti,ab.
97. \*mental health/
98. exp behavior problems/ or exp behavior disorders/ or exp conduct disorder/
99. exp anxiety disorders/
100. exp hyperkinesis/ or exp attention deficit disorder with hyperactivity/
101. \*deprivation/ or exp psychological stress/ or exp stress/
102. \*affective disorders/ or \*major depression/
103. 83 or 84 or 85 or 86 or 87 or 88 or 89 or 90 or 91 or 92 or 93 or 94 or 95 or 96 or 97 or 98 or 99 or 100 or 101 or 102
104. 49 or 72 or 82 or 103
105. 35 and 104
106. limit 105 to (human and yr="1995 –Current)





Supplementary Figure 1 – Flow chart of literature search

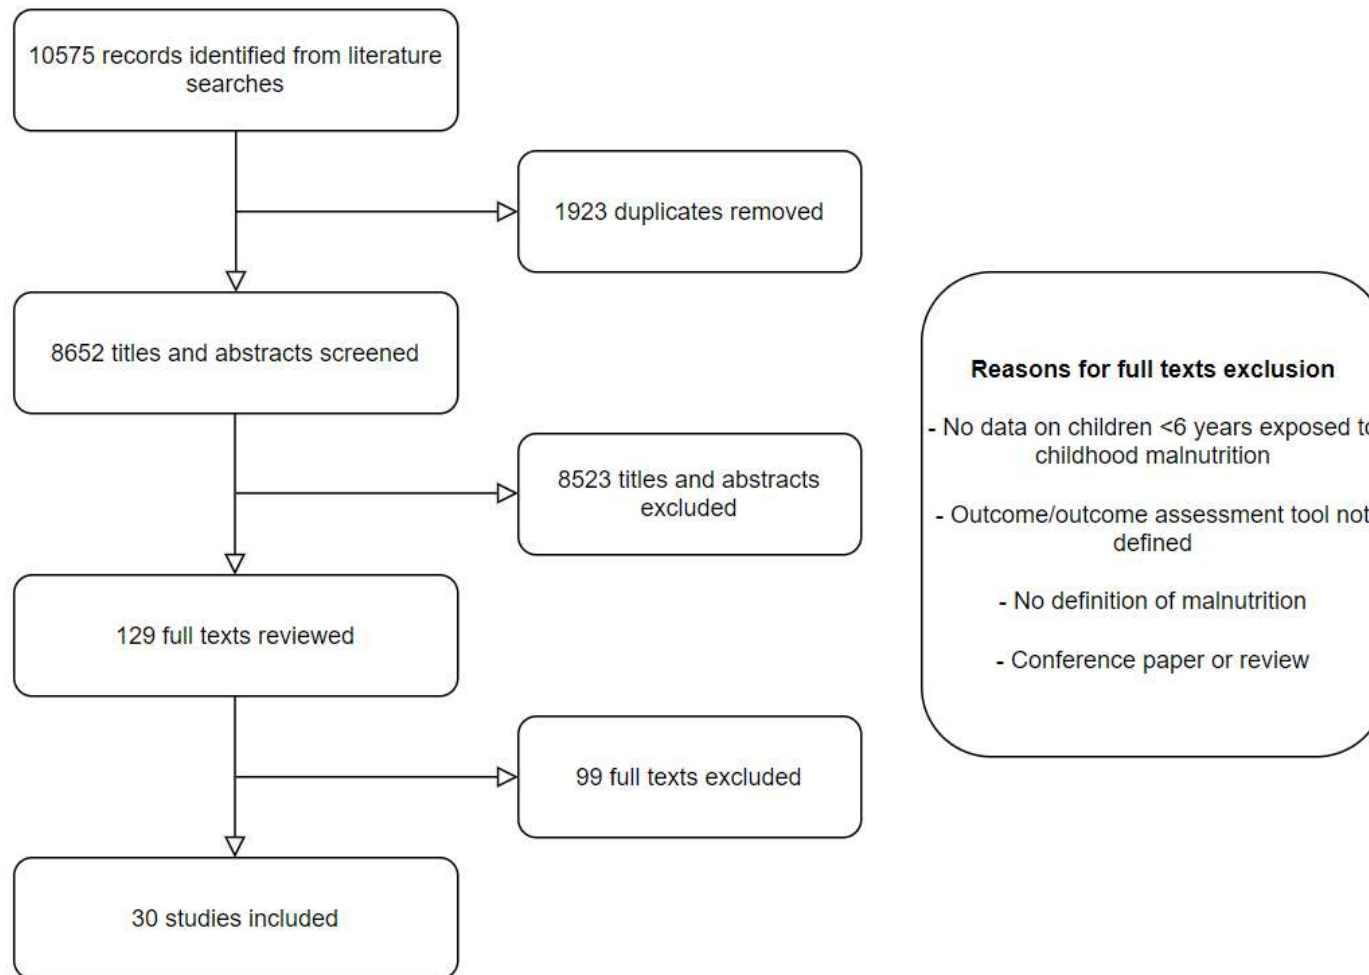

Supplementary Table 1 – Study Characteristics

| Study (Year published)                          | Country (Years conducted) | Study Design (Sample Size)                                                                          | Age exposed to malnutrition (Age at follow-up if different) | Malnutrition definition (reference population) | Outcome                                                 | Outcome Measurement Tool                  |
|-------------------------------------------------|---------------------------|-----------------------------------------------------------------------------------------------------|-------------------------------------------------------------|------------------------------------------------|---------------------------------------------------------|-------------------------------------------|
| <b>Chen <i>et al</i></b><br><b>(2021)</b>       | China<br><br>(2018)       | Cross-sectional study<br><br>(23 cases, 1270 controls)                                              | 3-5 years                                                   | w/h z score <-2 (WHO)                          | Cognition/ School achievement, Behaviour/ mental health | WPPSI-IV SDQ                              |
| <b>Mwene-Batu <i>et al</i></b><br><b>(2020)</b> | DRC<br><br>(1988 – 2019)  | Retrospective cohort<br><br>(524 cases, 407 controls)                                               | median 41 months<br><br>(median 22 years)                   | w/h z score <-3 (WHO)                          | Cognition/ School achievement, Behaviour/ mental health | MMSE, Rosenberg self-esteem scale, WHODAS |
| <b>Asiki <i>et al</i></b><br><b>(2019)</b>      | Uganda<br><br>(1999-2011) | Retrospective cohort<br><br>(12 cases with wasting, 145 cases recovered from wasting, 464 controls) | 2-5 years<br><br>(13-16 years)                              | w/h z score <-2 (WHO)                          | Cognition/ School achievement                           | Parental report of school years achieved  |
| <b>Dwivedi <i>et al</i></b><br><b>(2018)</b>    | India<br><br>(2014-15)    | Cross-sectional study<br><br>(102 cases, 101 controls)                                              | 6-30 months                                                 | WHO definition of severe acute malnutrition    | Neurodevelopment                                        | DASII (Indian modification of BSID)       |

| Study (Year published)               | Country (Years conducted)                                                                       | Study Design (Sample Size)                             | Age exposed to malnutrition (Age at follow-up if different)                     | Malnutrition definition (reference population)                                              | Outcome                                    | Outcome Measurement Tool                |
|--------------------------------------|-------------------------------------------------------------------------------------------------|--------------------------------------------------------|---------------------------------------------------------------------------------|---------------------------------------------------------------------------------------------|--------------------------------------------|-----------------------------------------|
| <b>Kang <i>et al</i> (2018)</b>      | Bangladesh (2014), Bhutan (2011), Nepal (2015), Punjab, Pakistan (2016), Sindh, Pakistan (2015) | Cross-sectional study<br><br>(31037 participants)      | 36-59 months                                                                    | w/h z score <-2 (WHO)                                                                       | Neurodevelopment                           | MICS ECDI                               |
| <b>Lelijveld <i>et al</i> (2018)</b> | Malawi (2006-2013)                                                                              | Prospective cohort<br><br>(171 cases, 155 controls)    | median 21.5 months [IQR 15-32]<br><br>(9 years)                                 | w/h <70% of the median (NCHS)                                                               | Cognition/ School achievement              | CANTAB, Parental report of school grade |
| <b>Abessa <i>et al</i> (2017)</b>    | Ethiopia (2011-13)                                                                              | Cross-sectional study<br><br>(310 cases, 310 controls) | cases - mean 30.7 months (SD 15.2)<br><br>controls – mean 29.6 months (SD 15.4) | w/h <70% of the median (NCHS), MUAC <110mm, or bilateral pitting oedema due to malnutrition | Neurodevelopment, Behaviour/ Mental Health | Denver II, ASQ                          |
| <b>Sudfeld <i>et al</i> (2015)</b>   | Tanzania (2010-14)                                                                              | Randomised Controlled Trial                            | 18-36 months                                                                    | w/h z score <-2 (WHO)                                                                       | Neurodevelopment                           | BSID-III                                |

| Study (Year published)                | Country (Years conducted) | Study Design (Sample Size)                    | Age exposed to malnutrition (Age at follow-up if different) | Malnutrition definition (reference population) | Outcome                        | Outcome Measurement Tool                                                   |
|---------------------------------------|---------------------------|-----------------------------------------------|-------------------------------------------------------------|------------------------------------------------|--------------------------------|----------------------------------------------------------------------------|
|                                       |                           | (47 cases, 989 controls)                      |                                                             |                                                |                                |                                                                            |
| <b>De Grandis <i>et al</i> (2014)</b> | Argentina (not stated)    | Retrospective cohort (25 cases, 28 controls)  | 0-2 years (5-12 years)                                      | w/h z score <-3 (or <70% expected) (WHO)       | Behaviour/ Mental Health       | Paediatric quality of life inventory                                       |
| <b>Malhi <i>et al</i> (2013)</b>      | India (not stated)        | Cross-sectional study (20 cases, 44 controls) | 0-6 years                                                   | w/a z-score < -2 (WHO)                         | Neurodevelopment               | Indian development inventory                                               |
| <b>Bogale <i>et al</i> (2013)</b>     | Ethiopia (2007)           | Cross-sectional study (12 cases, 88 controls) | 61.0 months +- 3.0                                          | w/a z-score < -2 (WHO)                         | Cognition / School achievement | Raven's CPM, KABC-II                                                       |
| <b>Warsito <i>et al</i> (2012)</b>    | Indonesia (not stated)    | Cross-sectional study (5 cases, 48 controls)  | 3-5 years old                                               | w/h z-score < -2 (WHO)                         | Cognition/ School achievement  | Indonesian Department of National Education – child development instrument |
| <b>Nassar <i>et al</i></b>            | Egypt                     | Cross-sectional study                         | 3-6 years old                                               | Wellcome classification                        | Cognition/ School achievement  | Stanford-Binet-Intelligence-Scale (Arabic-translation)                     |

| Study (Year published)                  | Country (Years conducted)  | Study Design (Sample Size)                         | Age exposed to malnutrition (Age at follow-up if different) | Malnutrition definition (reference population)                                                   | Outcome                       | Outcome Measurement Tool                                                                                           |
|-----------------------------------------|----------------------------|----------------------------------------------------|-------------------------------------------------------------|--------------------------------------------------------------------------------------------------|-------------------------------|--------------------------------------------------------------------------------------------------------------------|
| (2012)                                  | (not stated)               | (33 cases, 30 controls)                            |                                                             | (WHO)                                                                                            |                               | Receptive/Expressive/-Total-Language (Arabic-Language-Test)                                                        |
| <b>Baker-Henningham et al</b><br>(2009) | Bangladesh<br>(not stated) | Cross-sectional study<br>(212 cases, 108 controls) | 6-24 months old                                             | w/a z-score < -2 (NCHS)                                                                          | Behaviour/ Mental Health      | Temperament Questionnaire derived from existing validated instruments (modified by Wachs, Purdue University)       |
| <b>El-Khayat et al</b><br>(2007)        | Egypt<br>(2006)            | Cross-sectional study<br>(42 cases, 15 controls)   | 6-25 months                                                 | w/h z-score < -2 (WHO)                                                                           | Neurodevelopment              | BSID-II                                                                                                            |
| <b>Liu et al</b><br>(2004)              | Mauritius<br>(1972-)       | Prospective Cohort<br>(235 cases, 807 controls)    | 3 years<br>(8,11, 17 years)                                 | Malnutrition and one of angular stomatitis, kwashiorkor, sparse thin hair, haemoglobin <8.5gr/dl | Behaviour/ Mental Health      | Child behaviour questionnaire at age 8, Child Behaviour Checklist at age 11, Revised Behaviour Checklist at Age 17 |
| <b>Liu et al</b><br>(2003)              | Mauritius<br>(1972-)       | Prospective Cohort<br>(253 cases, 837 controls)    | 3 years<br>(11 years)                                       | Malnutrition and one of angular stomatitis, kwashiorkor, sparse thin hair,                       | Cognition/ School achievement | Bohem Test<br>WISC<br>Academic Tests<br>Holborn-Reading Scale<br>Trail Making Test                                 |

| Study (Year published)             | Country (Years conducted)        | Study Design (Sample Size)                               | Age exposed to malnutrition (Age at follow-up if different) | Malnutrition definition (reference population)                      | Outcome                       | Outcome Measurement Tool                          |
|------------------------------------|----------------------------------|----------------------------------------------------------|-------------------------------------------------------------|---------------------------------------------------------------------|-------------------------------|---------------------------------------------------|
|                                    |                                  |                                                          |                                                             | haemoglobin <8.5gr/dl                                               |                               |                                                   |
| <b>Drewett <i>et al</i> (2001)</b> | Ethiopia<br>(not stated)         | Prospective Cohort<br><br>(97 cases, 100 controls)       | 2 years                                                     | w/a z-score < -1.88<br>(NCHS)                                       | Neurodevelopment              | BSID                                              |
| <b>Vazir <i>et al</i> (1998)</b>   | India<br>(not stated)            | Cross-sectional study<br><br>(1456 cases, 2212 controls) | 0-6 years                                                   | <75% expected w/a<br>(NCHS)                                         | Neurodevelopment              | ICMR Psychosocial Developmental Screening Test    |
| <b>Perales <i>et al</i> (1996)</b> | Chile<br><br>(1987 – not stated) | Retrospective Cohort<br><br>(40 cases, 40 controls)      | 0-2 years<br><br>(8-10 years)                               | Protein energy malnutrition (defined by Sempe (1979) <i>et al</i> ) | Cognition/ School achievement | Continuous Performance Task<br>Anstey Domino Test |
| <b>Kaul <i>et al</i> (1995)</b>    | India<br>(not stated)            | Cross-sectional study<br><br>(50 cases, 102 controls)    | 0-12 months                                                 | Gomez classification – moderate malnutrition (NCHS)                 | Neurodevelopment              | BSID                                              |
| Barbados Nutrition Study           |                                  |                                                          |                                                             |                                                                     |                               |                                                   |

| <b>Study (Year published)</b>          | <b>Country (Years conducted)</b> | <b>Study Design (Sample Size)</b>                 | <b>Age exposed to malnutrition (Age at follow-up if different)</b> | <b>Malnutrition definition (reference population)</b> | <b>Outcome</b>                                              | <b>Outcome Measurement Tool</b>                                                                                |
|----------------------------------------|----------------------------------|---------------------------------------------------|--------------------------------------------------------------------|-------------------------------------------------------|-------------------------------------------------------------|----------------------------------------------------------------------------------------------------------------|
| <b>Hock <i>et al</i>* (2018)</b>       | Barbados<br>(1977-not stated)    | Prospective cohort<br><br>(77 cases, 62 controls) | 0-1 years<br><br>(40-45 years)                                     | Gomez classification                                  | Behaviour/mental health                                     | SCID-II-PQ, NEO PI-R FFM                                                                                       |
| <b>Waber (1) <i>et al</i>* (2014)</b>  | Barbados<br>(1977-2010)          | Prospective cohort<br><br>(77 cases, 59 controls) | 0-1 years<br><br>(38 years)                                        | Gomez classification                                  | Cognition/ School achievement                               | WASI, WRAT-III                                                                                                 |
| <b>Waber (2) <i>et al</i>* (2014)</b>  | Barbados<br>(1977-2010)          | Prospective cohort<br><br>(77 cases, 59 controls) | 0-1 years<br><br>(38 years)                                        | Gomez classification                                  | Cognition / School achievement,<br>Behaviour/ Mental Health | WAIS-III, D-KEFS, WRAML-II,<br>Wisconsin card sorting,<br>Metacognitive index,<br>Behavioural regulation index |
| <b>Galler <i>et al</i>* (2013)</b>     | Barbados<br>(2006-2010)          | Prospective cohort<br><br>(77 cases, 57 controls) | 0-1 years<br><br>(37 - 43 years)                                   | Gomez classification                                  | Behaviour/ Mental Health                                    | NEO-PI-R personality inventory                                                                                 |
| <b>Galler (1) <i>et al</i>* (2012)</b> | Barbados<br>(1967-2010)          | Prospective cohort<br><br>(80 cases, 65 controls) | 0-1 years<br><br>(40 years)                                        | Gomez classification                                  | Behaviour/ Mental Health                                    | CAARS, CPT                                                                                                     |
| <b>Galler (2) <i>et al</i>* (2012)</b> | Barbados<br>(1967-1985)          | Prospective cohort                                | 0-1 years<br><br>(15 years old)                                    | Gomez classification                                  | Behaviour/ Mental Health                                    | Child-Behaviour-Questionnaire,<br>Teacher-Behaviour-Questionnaire                                              |



| Study (Year published)                | Country (Years conducted) | Study Design (Sample Size)                      | Age exposed to malnutrition (Age at follow-up if different) | Malnutrition definition (reference population) | Outcome                                                    | Outcome Measurement Tool                                                                                                                                          |
|---------------------------------------|---------------------------|-------------------------------------------------|-------------------------------------------------------------|------------------------------------------------|------------------------------------------------------------|-------------------------------------------------------------------------------------------------------------------------------------------------------------------|
| (2012)                                |                           | (56 cases, 60 controls)                         |                                                             |                                                |                                                            |                                                                                                                                                                   |
| <b>Waber <i>et al</i>*</b><br>(2011)  | Barbados<br>(1967-1985)   | Prospective cohort<br>(57 cases, 60 controls)   | 0-1 years<br>(11-18 years)                                  | Gomez classification                           | Cognition/ School achievement and Behaviour/ Mental Health | WISC, Common entrance examination (local school test), Teacher-Behaviour Questionnaire, School functioning scale<br>Minnesota-General-Adjustment-and Morale-Scale |
| <b>Galler <i>et al</i>*</b><br>(2011) | Barbados<br>(1967-1985)   | Prospective cohort<br>(109 cases, 107 controls) | 0-1 years<br>(9-17 years)                                   | Gomez classification                           | Behaviour/ Mental Health                                   | Barbados-Child-Behaviour-Scale (BCBS)                                                                                                                             |
| <b>Galler <i>et al</i>*</b><br>(2010) | Barbados<br>(1967-1985)   | Prospective cohort<br>(116 cases, 61 controls)  | 0-1 years<br>(11-17 years old)                              | Gomez classification                           | Behaviour/ Mental Health                                   | Minnesota-General-Adjustment-and Morale-Scale                                                                                                                     |

\*Studies are drawn from the same Barbados Nutrition Study Cohort

ASQ – Ages & Stages Questionnaire, BSID – Bayley scales of infant development, CANTAB – Cambridge Neuropsychological Test Automated Battery, CAARS - Attention-domain: Conners-ADHD-Rating-Scales, CPT – Conners-Continuous-Performance Test, DASII – Developmental Assessment Scale of Indian Infants, DRC – Democratic Republic of Congo, D-KEFS – Delis-Kaplan Executive Function System, ICMR – Indian Council Medical Research Psychosocial Developmental Screening Test, KABC-II – Kaufman Assessment Battery for Children-II, MDAT – Malawi Developmental Assessment Tool, MICS ECDI – Multiple Indicator Cluster Survey Early Child Development Index, MMSE – Mini Mental State Exam, MUAC – Mean Upper Arm Circumference, NEO PI-R FFM – NEO Personality Inventory-Revised derived Five-Factor Model, NCHS – National Centre for Health Statistics reference population, Raven’s CPM – Raven’s

Colored Progressive Matrices, SCID-II-PQ – Structured Clinical Interview for DSM-IV Axis II Personality Disorders Personality Questionnaire, SDQ – Strengths and Difficulties Questionnaire, w/h – Weight-for-Height, WAIS-III – Wechsler Adult Intelligence Scale-III, WASI – Adult IQ: Weschler Abbreviated Scale of Intelligence – Vocabulary and Matrix Reasoning subsets, WHO – World Health Organization reference population, WHODAS – World Health Organization Disability Assessment Schedule, WISC – Weschler Intelligence Scale, WPPSI-IV – Wechsler Preschool and Primary Scale of Intelligence Fourth Edition, WRAML-II – Wide Range Assessment of Memory and Learning-II, WRAT-III – Academic achievement: Wide Range Achievement Test-III – Reading Spelling and Calculation subsets

Supplementary Table 2 – Study quality scoring

| Study<br>(Year published)            | External Validity | Internal Validity | Overall Study Quality |
|--------------------------------------|-------------------|-------------------|-----------------------|
| Chen <i>et al</i> (2021)             | ++                | ++                | ++                    |
| Mwene-Batu <i>et al</i> (2020)       | ++                | +                 | +                     |
| Asiki <i>et al</i> (2019)            | ++                | ++                | ++                    |
| Dwivedi <i>et al</i> (2018)          | +                 | +                 | +                     |
| Hock <i>et al</i> (2018)             | ++                | +                 | +                     |
| Kang <i>et al</i> (2018)             | ++                | +                 | +                     |
| Lelijveld <i>et al</i> (2018)        | ++                | ++                | ++                    |
| Abessa <i>et al</i> (2017)           | ++                | ++                | ++                    |
| Sudfeld <i>et al</i> (2015)          | ++                | ++                | ++                    |
| De Grandis <i>et al</i> (2014)       | +                 | -                 | -                     |
| Waber (1) <i>et al</i> (2014)        | ++                | ++                | ++                    |
| Waber (2) <i>et al</i> (2014)        | ++                | ++                | ++                    |
| Malhi <i>et al</i> (2013)            | +                 | -                 | -                     |
| Galler <i>et al</i> (2013)           | ++                | +                 | +                     |
| Bogale <i>et al</i> (2013)           | ++                | ++                | ++                    |
| Galler (1) <i>et al</i> (2012)       | ++                | +                 | +                     |
| Galler (2) <i>et al</i> (2012)       | ++                | +                 | +                     |
| Warsito <i>et al</i> (2012)          | ++                | -                 | -                     |
| Nassar <i>et al</i> (2012)           | -                 | -                 | -                     |
| Waber <i>et al</i> (2011)            | ++                | +                 | +                     |
| Galler <i>et al</i> (2011)           | ++                | ++                | ++                    |
| Galler <i>et al</i> (2010)           | ++                | ++                | ++                    |
| Baker-Henningham <i>et al</i> (2009) | ++                | ++                | ++                    |
| El-Khayat <i>et al</i> (2007)        | +                 | +                 | +                     |
| Liu <i>et al</i> (2004)              | ++                | ++                | ++                    |
| Liu <i>et al</i> (2003)              | ++                | ++                | ++                    |
| Drewett <i>et al</i> (2001)          | ++                | ++                | ++                    |
| Vazir <i>et al</i> (1998)            | ++                | +                 | +                     |
| Perales <i>et al</i> (1996)          | +                 | +                 | +                     |
| Kaul <i>et al</i> (1995)             | +                 | +                 | +                     |

++ = very good

+ = adequate

- = poor

Supplementary Table 3 – Results from studies assessing neurodevelopment in children with malnutrition compared to controls

| Study (quality)                        | Neurodevelopment tool/measurement   | Summary of results                                                                                                                                                                                                                                                                                                                                                                                                                                                                                                                                                                                                                                                                                                                                                                                                                                                       |             |                                                                                                                                                                                                                                                                                                                                                                                                                                                                                                                                                                                                                                                                                                                                                                |         |                       |                     |            |                          |                          |        |                          |                          |       |                          |                          |
|----------------------------------------|-------------------------------------|--------------------------------------------------------------------------------------------------------------------------------------------------------------------------------------------------------------------------------------------------------------------------------------------------------------------------------------------------------------------------------------------------------------------------------------------------------------------------------------------------------------------------------------------------------------------------------------------------------------------------------------------------------------------------------------------------------------------------------------------------------------------------------------------------------------------------------------------------------------------------|-------------|----------------------------------------------------------------------------------------------------------------------------------------------------------------------------------------------------------------------------------------------------------------------------------------------------------------------------------------------------------------------------------------------------------------------------------------------------------------------------------------------------------------------------------------------------------------------------------------------------------------------------------------------------------------------------------------------------------------------------------------------------------------|---------|-----------------------|---------------------|------------|--------------------------|--------------------------|--------|--------------------------|--------------------------|-------|--------------------------|--------------------------|
| <b>Dwivedi et al (2018)</b><br><br>(+) | DASII (Indian modification of BSID) | Controls n=101                                                                                                                                                                                                                                                                                                                                                                                                                                                                                                                                                                                                                                                                                                                                                                                                                                                           | Cases n=102 | <p><b><u>Mental age:</u></b></p> <p style="text-align: center;">10.4 (SE 0.5)                      8.2 (SE 0.4)</p> <p><b><u>Mental development quotient:</u></b></p> <p style="text-align: center;">83.5 (SE 1.0)                      62.1 (SE 0.6)</p> <p><b><u>Motor age:</u></b></p> <p style="text-align: center;">10.1 (SE 0.5)                      7.9 (SE 0.4)</p> <p><b><u>Motor development quotient:</u></b></p> <p style="text-align: center;">80.0 (SE 1.0)                      59.0 (SE 0.7)</p> <p><b><u>Adjusted analysis:</u></b><br/>(unadjusted analysis)</p> <p><b><u>Overall findings:</u></b><br/>Significant developmental delay in children with severe malnutrition compared to controls unadjusted for confounding variables.</p> |         |                       |                     |            |                          |                          |        |                          |                          |       |                          |                          |
| <b>Kang et al 2018</b><br><br>(+)      | MICS ECDI                           | <p><b><u>Learning-cognition development (odds of cases being on track compared to controls):</u></b></p> <table border="1" style="width: 100%; border-collapse: collapse;"> <thead> <tr> <th style="text-align: left;">Country</th> <th style="text-align: center;">Unadjusted Odds Ratio</th> <th style="text-align: center;">Adjusted Odds Ratio</th> </tr> </thead> <tbody> <tr> <td>Bangladesh</td> <td style="text-align: center;">1.27 [95% CI 0.92, 1.75]</td> <td style="text-align: center;">1.27 [95% CI 0.90, 1.79]</td> </tr> <tr> <td>Bhutan</td> <td style="text-align: center;">1.60 [95% CI 0.32, 7.85]</td> <td style="text-align: center;">1.93 [95% CI 0.39, 9.48]</td> </tr> <tr> <td>Nepal</td> <td style="text-align: center;">1.09 [95% CI 0.66, 1.79]</td> <td style="text-align: center;">1.52 [95% CI 0.90, 2.58]</td> </tr> </tbody> </table> |             |                                                                                                                                                                                                                                                                                                                                                                                                                                                                                                                                                                                                                                                                                                                                                                | Country | Unadjusted Odds Ratio | Adjusted Odds Ratio | Bangladesh | 1.27 [95% CI 0.92, 1.75] | 1.27 [95% CI 0.90, 1.79] | Bhutan | 1.60 [95% CI 0.32, 7.85] | 1.93 [95% CI 0.39, 9.48] | Nepal | 1.09 [95% CI 0.66, 1.79] | 1.52 [95% CI 0.90, 2.58] |
| Country                                | Unadjusted Odds Ratio               | Adjusted Odds Ratio                                                                                                                                                                                                                                                                                                                                                                                                                                                                                                                                                                                                                                                                                                                                                                                                                                                      |             |                                                                                                                                                                                                                                                                                                                                                                                                                                                                                                                                                                                                                                                                                                                                                                |         |                       |                     |            |                          |                          |        |                          |                          |       |                          |                          |
| Bangladesh                             | 1.27 [95% CI 0.92, 1.75]            | 1.27 [95% CI 0.90, 1.79]                                                                                                                                                                                                                                                                                                                                                                                                                                                                                                                                                                                                                                                                                                                                                                                                                                                 |             |                                                                                                                                                                                                                                                                                                                                                                                                                                                                                                                                                                                                                                                                                                                                                                |         |                       |                     |            |                          |                          |        |                          |                          |       |                          |                          |
| Bhutan                                 | 1.60 [95% CI 0.32, 7.85]            | 1.93 [95% CI 0.39, 9.48]                                                                                                                                                                                                                                                                                                                                                                                                                                                                                                                                                                                                                                                                                                                                                                                                                                                 |             |                                                                                                                                                                                                                                                                                                                                                                                                                                                                                                                                                                                                                                                                                                                                                                |         |                       |                     |            |                          |                          |        |                          |                          |       |                          |                          |
| Nepal                                  | 1.09 [95% CI 0.66, 1.79]            | 1.52 [95% CI 0.90, 2.58]                                                                                                                                                                                                                                                                                                                                                                                                                                                                                                                                                                                                                                                                                                                                                                                                                                                 |             |                                                                                                                                                                                                                                                                                                                                                                                                                                                                                                                                                                                                                                                                                                                                                                |         |                       |                     |            |                          |                          |        |                          |                          |       |                          |                          |

|                                 |                                                     | <p>Punjab 0.63 [95% CI 0.50, 0.79] 0.67 [95% CI 0.53, 0.86]<br/> Sindh 0.69 [95% CI 0.53, 0.89] 0.76 [95% CI 0.59, 0.97]<br/> All 0.98 [95% CI 0.70, 1.37]</p> <p><b><u>Socio-emotional development (odds of cases being on track compared to controls):</u></b></p> <table border="1"> <thead> <tr> <th>Country</th> <th>Unadjusted Odds Ratio</th> <th>Adjusted Odds Ratio</th> </tr> </thead> <tbody> <tr> <td>Bangladesh</td> <td>1.14 [95% CI 0.92, 1.42]</td> <td>1.10 [95% CI 0.40, 1.88]</td> </tr> <tr> <td>Bhutan</td> <td>1.08 [95% CI 0.58, 2.01]</td> <td>1.08 [95% CI 0.58, 2.03]</td> </tr> <tr> <td>Nepal</td> <td>2.40 [95% CI 1.25, 4.58]</td> <td>2.54 [95% CI 1.33, 4.85]</td> </tr> <tr> <td>Punjab</td> <td>0.86 [95% CI 0.73, 1.02]</td> <td>0.88 [95% CI 0.74, 1.04]</td> </tr> <tr> <td>Sindh</td> <td>0.92 [95% CI 0.74, 1.14]</td> <td>0.94 [95% CI 0.76, 1.15]</td> </tr> <tr> <td>All</td> <td></td> <td>1.07 [95% CI 0.86, 1.33]</td> </tr> </tbody> </table> <p><b><u>Adjusted analysis:</u></b> (results adjusted for rural/urban, wealth quintile, household size, household head, water source, toilet facility, maternal education, child age and sex, diarrhoea/cough in past 2 weeks, study design effect, early childhood education, support for learning, availability of children’s books and playthings, inadequate care)</p> <p><b><u>Sample size:</u></b><br/> n = 31037, wasting prevalence = between 4.1-12.8% across study sites</p> <p><b><u>Overall findings:</u></b><br/> Mixed results between study sites with no significant difference between cases and controls including when adjusted for confounding variables</p> | Country | Unadjusted Odds Ratio | Adjusted Odds Ratio | Bangladesh | 1.14 [95% CI 0.92, 1.42] | 1.10 [95% CI 0.40, 1.88] | Bhutan | 1.08 [95% CI 0.58, 2.01] | 1.08 [95% CI 0.58, 2.03] | Nepal | 2.40 [95% CI 1.25, 4.58] | 2.54 [95% CI 1.33, 4.85] | Punjab | 0.86 [95% CI 0.73, 1.02] | 0.88 [95% CI 0.74, 1.04] | Sindh | 0.92 [95% CI 0.74, 1.14] | 0.94 [95% CI 0.76, 1.15] | All |  | 1.07 [95% CI 0.86, 1.33] |
|---------------------------------|-----------------------------------------------------|------------------------------------------------------------------------------------------------------------------------------------------------------------------------------------------------------------------------------------------------------------------------------------------------------------------------------------------------------------------------------------------------------------------------------------------------------------------------------------------------------------------------------------------------------------------------------------------------------------------------------------------------------------------------------------------------------------------------------------------------------------------------------------------------------------------------------------------------------------------------------------------------------------------------------------------------------------------------------------------------------------------------------------------------------------------------------------------------------------------------------------------------------------------------------------------------------------------------------------------------------------------------------------------------------------------------------------------------------------------------------------------------------------------------------------------------------------------------------------------------------------------------------------------------------------------------------------------------------------------------------------------------------------------------------|---------|-----------------------|---------------------|------------|--------------------------|--------------------------|--------|--------------------------|--------------------------|-------|--------------------------|--------------------------|--------|--------------------------|--------------------------|-------|--------------------------|--------------------------|-----|--|--------------------------|
| Country                         | Unadjusted Odds Ratio                               | Adjusted Odds Ratio                                                                                                                                                                                                                                                                                                                                                                                                                                                                                                                                                                                                                                                                                                                                                                                                                                                                                                                                                                                                                                                                                                                                                                                                                                                                                                                                                                                                                                                                                                                                                                                                                                                          |         |                       |                     |            |                          |                          |        |                          |                          |       |                          |                          |        |                          |                          |       |                          |                          |     |  |                          |
| Bangladesh                      | 1.14 [95% CI 0.92, 1.42]                            | 1.10 [95% CI 0.40, 1.88]                                                                                                                                                                                                                                                                                                                                                                                                                                                                                                                                                                                                                                                                                                                                                                                                                                                                                                                                                                                                                                                                                                                                                                                                                                                                                                                                                                                                                                                                                                                                                                                                                                                     |         |                       |                     |            |                          |                          |        |                          |                          |       |                          |                          |        |                          |                          |       |                          |                          |     |  |                          |
| Bhutan                          | 1.08 [95% CI 0.58, 2.01]                            | 1.08 [95% CI 0.58, 2.03]                                                                                                                                                                                                                                                                                                                                                                                                                                                                                                                                                                                                                                                                                                                                                                                                                                                                                                                                                                                                                                                                                                                                                                                                                                                                                                                                                                                                                                                                                                                                                                                                                                                     |         |                       |                     |            |                          |                          |        |                          |                          |       |                          |                          |        |                          |                          |       |                          |                          |     |  |                          |
| Nepal                           | 2.40 [95% CI 1.25, 4.58]                            | 2.54 [95% CI 1.33, 4.85]                                                                                                                                                                                                                                                                                                                                                                                                                                                                                                                                                                                                                                                                                                                                                                                                                                                                                                                                                                                                                                                                                                                                                                                                                                                                                                                                                                                                                                                                                                                                                                                                                                                     |         |                       |                     |            |                          |                          |        |                          |                          |       |                          |                          |        |                          |                          |       |                          |                          |     |  |                          |
| Punjab                          | 0.86 [95% CI 0.73, 1.02]                            | 0.88 [95% CI 0.74, 1.04]                                                                                                                                                                                                                                                                                                                                                                                                                                                                                                                                                                                                                                                                                                                                                                                                                                                                                                                                                                                                                                                                                                                                                                                                                                                                                                                                                                                                                                                                                                                                                                                                                                                     |         |                       |                     |            |                          |                          |        |                          |                          |       |                          |                          |        |                          |                          |       |                          |                          |     |  |                          |
| Sindh                           | 0.92 [95% CI 0.74, 1.14]                            | 0.94 [95% CI 0.76, 1.15]                                                                                                                                                                                                                                                                                                                                                                                                                                                                                                                                                                                                                                                                                                                                                                                                                                                                                                                                                                                                                                                                                                                                                                                                                                                                                                                                                                                                                                                                                                                                                                                                                                                     |         |                       |                     |            |                          |                          |        |                          |                          |       |                          |                          |        |                          |                          |       |                          |                          |     |  |                          |
| All                             |                                                     | 1.07 [95% CI 0.86, 1.33]                                                                                                                                                                                                                                                                                                                                                                                                                                                                                                                                                                                                                                                                                                                                                                                                                                                                                                                                                                                                                                                                                                                                                                                                                                                                                                                                                                                                                                                                                                                                                                                                                                                     |         |                       |                     |            |                          |                          |        |                          |                          |       |                          |                          |        |                          |                          |       |                          |                          |     |  |                          |
| <b>Abessa et al (2017) (++)</b> | <p>Denver II</p> <p>ASQ: social-emotional score</p> | <p><b><u>Denver II score (incidence rate ratio in cases compared to controls):</u></b></p> <p>Fine motor IRR 0.76 [95% CI 0.71, 0.8]<br/> Gross motor IRR 0.73 [95% CI 0.71, 0.74]<br/> Language IRR 0.98 [95% CI 0.86, 1.11]<br/> Personal-social IRR 0.7 [95% CI 0.65, 0.75]</p> <p><b><u>Adjusted analysis:</u></b><br/> (results adjusted for significant variables from age, sex, maternal religion)</p>                                                                                                                                                                                                                                                                                                                                                                                                                                                                                                                                                                                                                                                                                                                                                                                                                                                                                                                                                                                                                                                                                                                                                                                                                                                                |         |                       |                     |            |                          |                          |        |                          |                          |       |                          |                          |        |                          |                          |       |                          |                          |     |  |                          |

|                                                         |                              | <p><b>Sample size:</b><br/>Cases n=310, Controls n=310</p> <p><b>Overall Findings:</b><br/>Children with malnutrition performed worse on personal-social, fine motor, and gross motor skills compared to age and sex-matched controls adjusted for confounding variables. Motor skills are the most and personal social the least affected domains assessed on the Denver II Jimma.</p>                                                                                                                                                                                                                                                                                                                                             |         |               |            |         |                          |  |  |  |              |                   |                   |       |                |                  |                  |       |             |               |                   |       |                     |                  |                 |       |                 |                  |                |       |
|---------------------------------------------------------|------------------------------|-------------------------------------------------------------------------------------------------------------------------------------------------------------------------------------------------------------------------------------------------------------------------------------------------------------------------------------------------------------------------------------------------------------------------------------------------------------------------------------------------------------------------------------------------------------------------------------------------------------------------------------------------------------------------------------------------------------------------------------|---------|---------------|------------|---------|--------------------------|--|--|--|--------------|-------------------|-------------------|-------|----------------|------------------|------------------|-------|-------------|---------------|-------------------|-------|---------------------|------------------|-----------------|-------|-----------------|------------------|----------------|-------|
| <p><b>Sudfeld <i>et al</i> (2015)</b><br/><br/>(++)</p> | BSID-III                     | <p><b>BSID-II score (association between score and malnutrition):</b><br/>Cognitive -0.63 [95% CI -0.97, -0.29]<br/>Communication -0.32 [95% CI -0.64, -0.01]<br/>Motor -0.54 [95% CI -0.86, -0.23]</p> <p><b>Adjusted analysis:</b><br/>(results adjusted for height-for-age, stimulation category, sex, age, assessor, maternal education, wealth quintile, randomized regimen)</p> <p><b>Sample size:</b><br/>Cases n=47, Controls n=989</p> <p><b>Overall Findings:</b><br/>Children experiencing wasting had across domain deficits compared to controls adjusted for confounding variables.</p>                                                                                                                               |         |               |            |         |                          |  |  |  |              |                   |                   |       |                |                  |                  |       |             |               |                   |       |                     |                  |                 |       |                 |                  |                |       |
| <p><b>Malhi <i>et al</i> 2013</b><br/><br/>(-)</p>      | Indian Development Inventory | <table border="1"> <thead> <tr> <th></th> <th>Controls n=20</th> <th>Cases n=44</th> <th>p value</th> </tr> </thead> <tbody> <tr> <td colspan="4"><b>Inventory domain:</b></td> </tr> <tr> <td>Social score</td> <td>104.64 (SD 17.11)</td> <td>101.30 (SD 17.31)</td> <td>0.036</td> </tr> <tr> <td>Adaptive score</td> <td>105.36 (SD 9.71)</td> <td>105.25 (SD 8.33)</td> <td>0.239</td> </tr> <tr> <td>Motor score</td> <td>112 (SD 14.5)</td> <td>108.85 (SD 10.93)</td> <td>0.074</td> </tr> <tr> <td>Communication score</td> <td>97.82 (SD 14.34)</td> <td>94.50 (SD 8.61)</td> <td>0.047</td> </tr> <tr> <td>Cognitive score</td> <td>92.82 (SD 13.92)</td> <td>90.1 (SD 9.79)</td> <td>0.080</td> </tr> </tbody> </table> |         | Controls n=20 | Cases n=44 | p value | <b>Inventory domain:</b> |  |  |  | Social score | 104.64 (SD 17.11) | 101.30 (SD 17.31) | 0.036 | Adaptive score | 105.36 (SD 9.71) | 105.25 (SD 8.33) | 0.239 | Motor score | 112 (SD 14.5) | 108.85 (SD 10.93) | 0.074 | Communication score | 97.82 (SD 14.34) | 94.50 (SD 8.61) | 0.047 | Cognitive score | 92.82 (SD 13.92) | 90.1 (SD 9.79) | 0.080 |
|                                                         | Controls n=20                | Cases n=44                                                                                                                                                                                                                                                                                                                                                                                                                                                                                                                                                                                                                                                                                                                          | p value |               |            |         |                          |  |  |  |              |                   |                   |       |                |                  |                  |       |             |               |                   |       |                     |                  |                 |       |                 |                  |                |       |
| <b>Inventory domain:</b>                                |                              |                                                                                                                                                                                                                                                                                                                                                                                                                                                                                                                                                                                                                                                                                                                                     |         |               |            |         |                          |  |  |  |              |                   |                   |       |                |                  |                  |       |             |               |                   |       |                     |                  |                 |       |                 |                  |                |       |
| Social score                                            | 104.64 (SD 17.11)            | 101.30 (SD 17.31)                                                                                                                                                                                                                                                                                                                                                                                                                                                                                                                                                                                                                                                                                                                   | 0.036   |               |            |         |                          |  |  |  |              |                   |                   |       |                |                  |                  |       |             |               |                   |       |                     |                  |                 |       |                 |                  |                |       |
| Adaptive score                                          | 105.36 (SD 9.71)             | 105.25 (SD 8.33)                                                                                                                                                                                                                                                                                                                                                                                                                                                                                                                                                                                                                                                                                                                    | 0.239   |               |            |         |                          |  |  |  |              |                   |                   |       |                |                  |                  |       |             |               |                   |       |                     |                  |                 |       |                 |                  |                |       |
| Motor score                                             | 112 (SD 14.5)                | 108.85 (SD 10.93)                                                                                                                                                                                                                                                                                                                                                                                                                                                                                                                                                                                                                                                                                                                   | 0.074   |               |            |         |                          |  |  |  |              |                   |                   |       |                |                  |                  |       |             |               |                   |       |                     |                  |                 |       |                 |                  |                |       |
| Communication score                                     | 97.82 (SD 14.34)             | 94.50 (SD 8.61)                                                                                                                                                                                                                                                                                                                                                                                                                                                                                                                                                                                                                                                                                                                     | 0.047   |               |            |         |                          |  |  |  |              |                   |                   |       |                |                  |                  |       |             |               |                   |       |                     |                  |                 |       |                 |                  |                |       |
| Cognitive score                                         | 92.82 (SD 13.92)             | 90.1 (SD 9.79)                                                                                                                                                                                                                                                                                                                                                                                                                                                                                                                                                                                                                                                                                                                      | 0.080   |               |            |         |                          |  |  |  |              |                   |                   |       |                |                  |                  |       |             |               |                   |       |                     |                  |                 |       |                 |                  |                |       |

|                                               |                | <p>Total score                      100.86 (SD 18.15)                      95 (SD 13.51)                      0.007</p> <p><b>Adjusted analysis:</b><br/>Multivariate regression revealed that 26.7% of variance was accounted by household income and stunting, indicating results were no longer significant</p> <p><b>Overall Findings:</b><br/>Children with wasting compared to controls did not have significantly lower domain scores adjusted for confounding variables.</p>                                                                                                                                                                                                                                                                                                                                                   |                                |                |                           |                     |                          |               |                                |                                |                                 |               |                  |                 |                   |              |              |              |              |              |               |               |
|-----------------------------------------------|----------------|----------------------------------------------------------------------------------------------------------------------------------------------------------------------------------------------------------------------------------------------------------------------------------------------------------------------------------------------------------------------------------------------------------------------------------------------------------------------------------------------------------------------------------------------------------------------------------------------------------------------------------------------------------------------------------------------------------------------------------------------------------------------------------------------------------------------------------------|--------------------------------|----------------|---------------------------|---------------------|--------------------------|---------------|--------------------------------|--------------------------------|---------------------------------|---------------|------------------|-----------------|-------------------|--------------|--------------|--------------|--------------|--------------|---------------|---------------|
| <p><b>El-Khayat et al 2007</b></p> <p>(+)</p> | BSID-II        | <table border="1"> <thead> <tr> <th></th> <th>Controls n=15</th> <th>Cases n=42 (before rehab)</th> <th>Cases (after rehab)</th> </tr> </thead> <tbody> <tr> <td>Mental Development Index</td> <td>97 (SD 10.92)</td> <td>76.3 (SD 8.78)</td> <td>88.19 (SD 8.93)</td> </tr> <tr> <td>Psychomotor Development Index</td> <td>97 (SD 12.38)</td> <td>72.76 (SD 11.27)</td> <td>87.39 (SD 8.85)</td> </tr> </tbody> </table> <p><b>Adjusted analysis:</b><br/>(unadjusted analysis)</p> <p><b>Overall Findings:</b><br/>Cases had lower scores at the start of the study compared to controls unadjusted for confounding variables. Scores were improved after 8 weeks of nutritional rehabilitation but were still significantly lower when compared to controls unadjusted for confounding variables.</p>                              |                                | Controls n=15  | Cases n=42 (before rehab) | Cases (after rehab) | Mental Development Index | 97 (SD 10.92) | 76.3 (SD 8.78)                 | 88.19 (SD 8.93)                | Psychomotor Development Index   | 97 (SD 12.38) | 72.76 (SD 11.27) | 87.39 (SD 8.85) |                   |              |              |              |              |              |               |               |
|                                               | Controls n=15  | Cases n=42 (before rehab)                                                                                                                                                                                                                                                                                                                                                                                                                                                                                                                                                                                                                                                                                                                                                                                                              | Cases (after rehab)            |                |                           |                     |                          |               |                                |                                |                                 |               |                  |                 |                   |              |              |              |              |              |               |               |
| Mental Development Index                      | 97 (SD 10.92)  | 76.3 (SD 8.78)                                                                                                                                                                                                                                                                                                                                                                                                                                                                                                                                                                                                                                                                                                                                                                                                                         | 88.19 (SD 8.93)                |                |                           |                     |                          |               |                                |                                |                                 |               |                  |                 |                   |              |              |              |              |              |               |               |
| Psychomotor Development Index                 | 97 (SD 12.38)  | 72.76 (SD 11.27)                                                                                                                                                                                                                                                                                                                                                                                                                                                                                                                                                                                                                                                                                                                                                                                                                       | 87.39 (SD 8.85)                |                |                           |                     |                          |               |                                |                                |                                 |               |                  |                 |                   |              |              |              |              |              |               |               |
| <p><b>Drewett et al 2001</b></p> <p>(++)</p>  | BSID           | <table border="1"> <thead> <tr> <th></th> <th>Controls n=100</th> <th>Cases n=27</th> <th>Cases n=70</th> </tr> <tr> <th></th> <th></th> <th>Early Malnutrition at 4 months</th> <th>Late Malnutrition at 12 months</th> </tr> </thead> <tbody> <tr> <td colspan="4"><b>BSID (score at 2 years):</b></td> </tr> <tr> <td>Psychomotor score</td> <td>10.2 (SD3.7)</td> <td>6.6 (SD 4.2)</td> <td>8.5 (SD 4.3)</td> </tr> <tr> <td>Mental score</td> <td>28.9 (SD5.8)</td> <td>22.6 (SD 6.2)</td> <td>26.6 (SD 6.1)</td> </tr> </tbody> </table> <p><b>Adjusted analysis:</b><br/>Weight at 2 years associated with BSID outcome, but early and late growth faltering before 1 year not independently associated with BSID scores after adjusting for weight at 2 years and other covariates (sex, mother's education, possessions).</p> |                                | Controls n=100 | Cases n=27                | Cases n=70          |                          |               | Early Malnutrition at 4 months | Late Malnutrition at 12 months | <b>BSID (score at 2 years):</b> |               |                  |                 | Psychomotor score | 10.2 (SD3.7) | 6.6 (SD 4.2) | 8.5 (SD 4.3) | Mental score | 28.9 (SD5.8) | 22.6 (SD 6.2) | 26.6 (SD 6.1) |
|                                               | Controls n=100 | Cases n=27                                                                                                                                                                                                                                                                                                                                                                                                                                                                                                                                                                                                                                                                                                                                                                                                                             | Cases n=70                     |                |                           |                     |                          |               |                                |                                |                                 |               |                  |                 |                   |              |              |              |              |              |               |               |
|                                               |                | Early Malnutrition at 4 months                                                                                                                                                                                                                                                                                                                                                                                                                                                                                                                                                                                                                                                                                                                                                                                                         | Late Malnutrition at 12 months |                |                           |                     |                          |               |                                |                                |                                 |               |                  |                 |                   |              |              |              |              |              |               |               |
| <b>BSID (score at 2 years):</b>               |                |                                                                                                                                                                                                                                                                                                                                                                                                                                                                                                                                                                                                                                                                                                                                                                                                                                        |                                |                |                           |                     |                          |               |                                |                                |                                 |               |                  |                 |                   |              |              |              |              |              |               |               |
| Psychomotor score                             | 10.2 (SD3.7)   | 6.6 (SD 4.2)                                                                                                                                                                                                                                                                                                                                                                                                                                                                                                                                                                                                                                                                                                                                                                                                                           | 8.5 (SD 4.3)                   |                |                           |                     |                          |               |                                |                                |                                 |               |                  |                 |                   |              |              |              |              |              |               |               |
| Mental score                                  | 28.9 (SD5.8)   | 22.6 (SD 6.2)                                                                                                                                                                                                                                                                                                                                                                                                                                                                                                                                                                                                                                                                                                                                                                                                                          | 26.6 (SD 6.1)                  |                |                           |                     |                          |               |                                |                                |                                 |               |                  |                 |                   |              |              |              |              |              |               |               |

|                                             |                                                       | <p><b>Overall Findings:</b><br/>Significantly lower psychomotor and mental scores at 2 years in early growth falterers and late growth falterers compared to controls. Difference is accounted for by differences in weight at 2 years when adjusted for in analysis.</p>                                                                                                                                                                                                                                                                                                                                                                                                                                                                                                                   |  |                |            |                                |  |  |                   |                  |                 |                     |                  |                  |                    |                  |                 |                      |                  |                 |
|---------------------------------------------|-------------------------------------------------------|---------------------------------------------------------------------------------------------------------------------------------------------------------------------------------------------------------------------------------------------------------------------------------------------------------------------------------------------------------------------------------------------------------------------------------------------------------------------------------------------------------------------------------------------------------------------------------------------------------------------------------------------------------------------------------------------------------------------------------------------------------------------------------------------|--|----------------|------------|--------------------------------|--|--|-------------------|------------------|-----------------|---------------------|------------------|------------------|--------------------|------------------|-----------------|----------------------|------------------|-----------------|
| <p><b>Vazir et al 1998</b><br/><br/>(+)</p> | <p>ICMR Psychosocial Developmental Screening Test</p> | <p><b>ICMR Psychosocial Development Screening Test Results:</b><br/>Well nourished children attained developmental milestones at a younger age in the five areas of development compared to undernourished children.</p> <p><b>Adjusted analysis:</b><br/>(unadjusted analysis)</p> <p><b>Sample size:</b><br/>Cases n=1456, Controls n=2212</p> <p><b>Overall Findings:</b><br/>Malnourished children attained developmental milestones at a later age unadjusted for confounders.</p>                                                                                                                                                                                                                                                                                                     |  |                |            |                                |  |  |                   |                  |                 |                     |                  |                  |                    |                  |                 |                      |                  |                 |
| <p><b>Kaul et al 1995</b><br/><br/>(+)</p>  | <p>BSID</p>                                           | <table border="1"> <thead> <tr> <th></th> <th>Controls n=102</th> <th>Cases n=50</th> </tr> </thead> <tbody> <tr> <td colspan="3"><b>BSID (mental quotient):</b></td> </tr> <tr> <td>Male (0-6 months)</td> <td>98.80 (SD 11.94)</td> <td>57.60 (SD 6.77)</td> </tr> <tr> <td>Female (0-6 months)</td> <td>97.28 (SD 10.22)</td> <td>59.85 (SD 11.94)</td> </tr> <tr> <td>Male (6-12 months)</td> <td>100.86 (SD 4.39)</td> <td>79.93 (SD 5.57)</td> </tr> <tr> <td>Female (6-12 months)</td> <td>103.68 (SD 4.31)</td> <td>75.15 (SD 3.39)</td> </tr> </tbody> </table> <p><b>Adjusted analysis:</b><br/>(unadjusted analysis)</p> <p><b>Overall Findings:</b><br/>Children with moderate malnutrition had a lower mental quotient than controls unadjusted for confounding variables.</p> |  | Controls n=102 | Cases n=50 | <b>BSID (mental quotient):</b> |  |  | Male (0-6 months) | 98.80 (SD 11.94) | 57.60 (SD 6.77) | Female (0-6 months) | 97.28 (SD 10.22) | 59.85 (SD 11.94) | Male (6-12 months) | 100.86 (SD 4.39) | 79.93 (SD 5.57) | Female (6-12 months) | 103.68 (SD 4.31) | 75.15 (SD 3.39) |
|                                             | Controls n=102                                        | Cases n=50                                                                                                                                                                                                                                                                                                                                                                                                                                                                                                                                                                                                                                                                                                                                                                                  |  |                |            |                                |  |  |                   |                  |                 |                     |                  |                  |                    |                  |                 |                      |                  |                 |
| <b>BSID (mental quotient):</b>              |                                                       |                                                                                                                                                                                                                                                                                                                                                                                                                                                                                                                                                                                                                                                                                                                                                                                             |  |                |            |                                |  |  |                   |                  |                 |                     |                  |                  |                    |                  |                 |                      |                  |                 |
| Male (0-6 months)                           | 98.80 (SD 11.94)                                      | 57.60 (SD 6.77)                                                                                                                                                                                                                                                                                                                                                                                                                                                                                                                                                                                                                                                                                                                                                                             |  |                |            |                                |  |  |                   |                  |                 |                     |                  |                  |                    |                  |                 |                      |                  |                 |
| Female (0-6 months)                         | 97.28 (SD 10.22)                                      | 59.85 (SD 11.94)                                                                                                                                                                                                                                                                                                                                                                                                                                                                                                                                                                                                                                                                                                                                                                            |  |                |            |                                |  |  |                   |                  |                 |                     |                  |                  |                    |                  |                 |                      |                  |                 |
| Male (6-12 months)                          | 100.86 (SD 4.39)                                      | 79.93 (SD 5.57)                                                                                                                                                                                                                                                                                                                                                                                                                                                                                                                                                                                                                                                                                                                                                                             |  |                |            |                                |  |  |                   |                  |                 |                     |                  |                  |                    |                  |                 |                      |                  |                 |
| Female (6-12 months)                        | 103.68 (SD 4.31)                                      | 75.15 (SD 3.39)                                                                                                                                                                                                                                                                                                                                                                                                                                                                                                                                                                                                                                                                                                                                                                             |  |                |            |                                |  |  |                   |                  |                 |                     |                  |                  |                    |                  |                 |                      |                  |                 |



95% CI – 95% confidence intervals, BSID – Bayley Scales of Infant Development, DASII – Developmental Assessment Scale of Indian Infants, ICMR – Indian Council Medical Research Psychosocial Developmental Screening Test, IDI – Indian Developmental Inventory, IRR – incidence rate ratio, MDAT – Malawi Developmental Assessment Tool, MICS ECDI – Multiple Indicator Cluster Survey Early Child Development Index, SD – Standard Deviation, SE – standard error

Supplementary Table 4 - Results from studies assessing cognitive outcomes in those exposed to childhood malnutrition compared to controls

| Study (quality)                         | Cognition tool/measurement (outcome age)        | Summary of results                                                                                                                                                                                         |                                          |                                           |         |
|-----------------------------------------|-------------------------------------------------|------------------------------------------------------------------------------------------------------------------------------------------------------------------------------------------------------------|------------------------------------------|-------------------------------------------|---------|
| Chen <i>et al</i> 2021<br><br>(++)      | WPPSI-IV<br><br>(childhood)                     | Controls n=1270                                                                                                                                                                                            |                                          | Cases n=23                                |         |
|                                         |                                                 | <b>WPPSI-IV:</b>                                                                                                                                                                                           |                                          |                                           |         |
|                                         |                                                 | Working Memory Index                                                                                                                                                                                       | 90.35 (SD 0.38)<br>[95% CI 89.60, 91.09] | 95.09 (SD 2.67)<br>[95% CI 89.86, 100.32] |         |
|                                         |                                                 | Verbal Comprehension Index                                                                                                                                                                                 | 86.00 (SD 0.36)<br>[95% CI 85.30, 86.70] | 87.26 (SD 3.29)<br>[95% CI 80.80, 93.72]  |         |
|                                         |                                                 | <b>Adjusted analysis:</b><br>Wasting was not statistically associated with any developmental outcome variables after adjusting for vector of child, parent, caregiver and household-level characteristics. |                                          |                                           |         |
|                                         |                                                 | <b>Overall findings:</b><br>Wasting was not associated with impaired cognition after adjusting for confounding variables                                                                                   |                                          |                                           |         |
| Mwene-Batu <i>et al</i> 2020<br><br>(+) | MMSE<br>Academic performance<br><br>(adulthood) | Controls n=407                                                                                                                                                                                             |                                          | Cases n=524                               | p value |
|                                         |                                                 | <b>MMSE:</b>                                                                                                                                                                                               |                                          |                                           |         |
|                                         |                                                 | Mean score                                                                                                                                                                                                 | 25.6 (SD 2.6)                            | 27.8 (SD 2.2)                             | 0.001   |
|                                         |                                                 | Normal score (%)                                                                                                                                                                                           | 78.0                                     | 90.1                                      | <0.001  |
|                                         |                                                 | <b>Academic performance (based on self-report):</b>                                                                                                                                                        |                                          |                                           |         |

|                                                 |                                                     | <p>Low (%) 15.2 23.8</p> <p>Average (%) 49.0 45.1</p> <p>High (%) 35.8 31.0 0.014</p> <p><b>Adjusted analysis:</b> (unadjusted analysis)</p> <p><b>Overall findings:</b><br/>Malnutrition survivors had a significantly lower probability of attaining a high education level, reported worse academic performance and a significantly lower mean cognition score unadjusted for confounding variables.</p>                                                                                                                                                                                                                                                                                                                                                                                               |                                       |                |                                    |                                                 |                                                 |                   |              |              |                                          |  |                            |                              |
|-------------------------------------------------|-----------------------------------------------------|-----------------------------------------------------------------------------------------------------------------------------------------------------------------------------------------------------------------------------------------------------------------------------------------------------------------------------------------------------------------------------------------------------------------------------------------------------------------------------------------------------------------------------------------------------------------------------------------------------------------------------------------------------------------------------------------------------------------------------------------------------------------------------------------------------------|---------------------------------------|----------------|------------------------------------|-------------------------------------------------|-------------------------------------------------|-------------------|--------------|--------------|------------------------------------------|--|----------------------------|------------------------------|
| <b>Asiki et al 2019</b><br><br><b>(++)</b>      | Academic achievement<br><br>(adolescence)           | <table border="1"> <thead> <tr> <th></th> <th>Controls n=464</th> <th>Children with ongoing wasting n=12</th> <th>Children recovered from wasting n=145</th> </tr> </thead> <tbody> <tr> <td><b>School years achieved (parental report):</b></td> <td>9.2 years (SD 11)</td> <td>6.2 (SD 2.5)</td> <td>7.8 (SD 3.8)</td> </tr> <tr> <td><b>Adjusted correlation coefficient:</b></td> <td></td> <td>-1.91 [95% CI -4.51, 0.68]</td> <td>- 2.05 [95% CI -3.30, -0.79]</td> </tr> </tbody> </table> <p><b>Adjusted analysis:</b> (adjusted for age group, sex, education, tribe, wall of house type, reported alcohol consumption)</p> <p><b>Overall findings:</b><br/>Wasting was associated with fewer schooling years regardless of recovery from undernutrition adjusted for confounding variables.</p> |                                       | Controls n=464 | Children with ongoing wasting n=12 | Children recovered from wasting n=145           | <b>School years achieved (parental report):</b> | 9.2 years (SD 11) | 6.2 (SD 2.5) | 7.8 (SD 3.8) | <b>Adjusted correlation coefficient:</b> |  | -1.91 [95% CI -4.51, 0.68] | - 2.05 [95% CI -3.30, -0.79] |
|                                                 | Controls n=464                                      | Children with ongoing wasting n=12                                                                                                                                                                                                                                                                                                                                                                                                                                                                                                                                                                                                                                                                                                                                                                        | Children recovered from wasting n=145 |                |                                    |                                                 |                                                 |                   |              |              |                                          |  |                            |                              |
| <b>School years achieved (parental report):</b> | 9.2 years (SD 11)                                   | 6.2 (SD 2.5)                                                                                                                                                                                                                                                                                                                                                                                                                                                                                                                                                                                                                                                                                                                                                                                              | 7.8 (SD 3.8)                          |                |                                    |                                                 |                                                 |                   |              |              |                                          |  |                            |                              |
| <b>Adjusted correlation coefficient:</b>        |                                                     | -1.91 [95% CI -4.51, 0.68]                                                                                                                                                                                                                                                                                                                                                                                                                                                                                                                                                                                                                                                                                                                                                                                | - 2.05 [95% CI -3.30, -0.79]          |                |                                    |                                                 |                                                 |                   |              |              |                                          |  |                            |                              |
| <b>Lelijveld et al 2018</b><br><br><b>(++)</b>  | Academic achievement<br>CANTAB<br><br>(adolescence) | <table border="1"> <thead> <tr> <th></th> <th>Controls n=178</th> <th>Cases n=315</th> </tr> </thead> <tbody> <tr> <td><b>School grade achieved (parental report):</b></td> <td>3.1 (SD 1.6)</td> <td>2.5 (SD 1.3)</td> </tr> </tbody> </table> <p><b>Logistic regression comparing school grade in groups:</b></p> <p>OR 0.5 [95% CI 0.4, 0.7 ]</p> <p>Adjusted OR 0.54 [95% CI 0.35, 0.81]</p>                                                                                                                                                                                                                                                                                                                                                                                                          |                                       | Controls n=178 | Cases n=315                        | <b>School grade achieved (parental report):</b> | 3.1 (SD 1.6)                                    | 2.5 (SD 1.3)      |              |              |                                          |  |                            |                              |
|                                                 | Controls n=178                                      | Cases n=315                                                                                                                                                                                                                                                                                                                                                                                                                                                                                                                                                                                                                                                                                                                                                                                               |                                       |                |                                    |                                                 |                                                 |                   |              |              |                                          |  |                            |                              |
| <b>School grade achieved (parental report):</b> | 3.1 (SD 1.6)                                        | 2.5 (SD 1.3)                                                                                                                                                                                                                                                                                                                                                                                                                                                                                                                                                                                                                                                                                                                                                                                              |                                       |                |                                    |                                                 |                                                 |                   |              |              |                                          |  |                            |                              |

|                                                    |                                                | <p><b>Adjusted analysis:</b> (adjusted for h/a z-score, age, sex, HIV, socioeconomic status)</p> <p><b>CANTAB cognition test scores:</b><br/>Malnutrition survivors had poorer scores in all CANTAB cognitive tests.</p> <p><b>Adjusted analysis:</b> Adjusting for HIV and socio-economic status diminished statistically significant differences in CANTAB test scores.</p> <p><b>Overall findings:</b><br/>Malnutrition survivors were significantly more likely to be in a lower grade at school than controls adjusted for confounding variables. Malnutrition survivors had poorer cognition scores than controls, but differences were not statistically significant when adjusted for confounding variables.</p>                                                                                                                                                                                                                                                                                                                                                                                                                                                                                                                                                                                                                                                                                                      |         |               |            |         |                          |  |  |  |                   |               |               |       |           |              |              |       |                     |              |              |       |                   |              |              |       |                   |               |               |       |            |              |              |     |               |              |              |       |               |              |              |       |
|----------------------------------------------------|------------------------------------------------|-------------------------------------------------------------------------------------------------------------------------------------------------------------------------------------------------------------------------------------------------------------------------------------------------------------------------------------------------------------------------------------------------------------------------------------------------------------------------------------------------------------------------------------------------------------------------------------------------------------------------------------------------------------------------------------------------------------------------------------------------------------------------------------------------------------------------------------------------------------------------------------------------------------------------------------------------------------------------------------------------------------------------------------------------------------------------------------------------------------------------------------------------------------------------------------------------------------------------------------------------------------------------------------------------------------------------------------------------------------------------------------------------------------------------------|---------|---------------|------------|---------|--------------------------|--|--|--|-------------------|---------------|---------------|-------|-----------|--------------|--------------|-------|---------------------|--------------|--------------|-------|-------------------|--------------|--------------|-------|-------------------|---------------|---------------|-------|------------|--------------|--------------|-----|---------------|--------------|--------------|-------|---------------|--------------|--------------|-------|
| <p><b>Bogale et al 2013</b></p> <p><b>(++)</b></p> | <p>Raven's CPM, KABC-II</p> <p>(childhood)</p> | <table border="1"> <thead> <tr> <th></th> <th>Controls n=88</th> <th>Cases n=12</th> <th>p value</th> </tr> </thead> <tbody> <tr> <td colspan="4"><b>Cognitive scores:</b></td> </tr> <tr> <td>Visual processing</td> <td>17.0 (SD 3.9)</td> <td>12.8 (SD 2.4)</td> <td>0.003</td> </tr> <tr> <td>Triangles</td> <td>4.3 (SD 2.4)</td> <td>1.7 (SD 1.0)</td> <td>0.001</td> </tr> <tr> <td>Conceptual thinking</td> <td>4.7 (SD 1.8)</td> <td>3.3 (SD 1.3)</td> <td>0.017</td> </tr> <tr> <td>Pattern reasoning</td> <td>8.1 (SD 1.8)</td> <td>7.9 (SD 1.7)</td> <td>0.726</td> </tr> <tr> <td>Short-term memory</td> <td>21.7 (SD 5.6)</td> <td>16.2 (SD 5.1)</td> <td>0.006</td> </tr> <tr> <td>Word order</td> <td>6.5 (SD 3.0)</td> <td>4.8 (SD 2.0)</td> <td>0.1</td> </tr> <tr> <td>Number recall</td> <td>7.1 (SD 2.2)</td> <td>5.4 (SD 2.5)</td> <td>0.025</td> </tr> <tr> <td>Hand movement</td> <td>8.1 (SD 2.1)</td> <td>5.9 (SD 1.1)</td> <td>0.004</td> </tr> </tbody> </table> <p><b>Adjusted analysis:</b><br/>When results adjusted via stepwise regression, visual processing and short-term memory remained significantly correlated when adjusted for maternal education, family size, and household roof type.</p> <p><b>Overall findings:</b><br/>Scores on short-term memory and visual processing were significantly poorer in cases compared to controls when adjusted for confounding variables.</p> |         | Controls n=88 | Cases n=12 | p value | <b>Cognitive scores:</b> |  |  |  | Visual processing | 17.0 (SD 3.9) | 12.8 (SD 2.4) | 0.003 | Triangles | 4.3 (SD 2.4) | 1.7 (SD 1.0) | 0.001 | Conceptual thinking | 4.7 (SD 1.8) | 3.3 (SD 1.3) | 0.017 | Pattern reasoning | 8.1 (SD 1.8) | 7.9 (SD 1.7) | 0.726 | Short-term memory | 21.7 (SD 5.6) | 16.2 (SD 5.1) | 0.006 | Word order | 6.5 (SD 3.0) | 4.8 (SD 2.0) | 0.1 | Number recall | 7.1 (SD 2.2) | 5.4 (SD 2.5) | 0.025 | Hand movement | 8.1 (SD 2.1) | 5.9 (SD 1.1) | 0.004 |
|                                                    | Controls n=88                                  | Cases n=12                                                                                                                                                                                                                                                                                                                                                                                                                                                                                                                                                                                                                                                                                                                                                                                                                                                                                                                                                                                                                                                                                                                                                                                                                                                                                                                                                                                                                    | p value |               |            |         |                          |  |  |  |                   |               |               |       |           |              |              |       |                     |              |              |       |                   |              |              |       |                   |               |               |       |            |              |              |     |               |              |              |       |               |              |              |       |
| <b>Cognitive scores:</b>                           |                                                |                                                                                                                                                                                                                                                                                                                                                                                                                                                                                                                                                                                                                                                                                                                                                                                                                                                                                                                                                                                                                                                                                                                                                                                                                                                                                                                                                                                                                               |         |               |            |         |                          |  |  |  |                   |               |               |       |           |              |              |       |                     |              |              |       |                   |              |              |       |                   |               |               |       |            |              |              |     |               |              |              |       |               |              |              |       |
| Visual processing                                  | 17.0 (SD 3.9)                                  | 12.8 (SD 2.4)                                                                                                                                                                                                                                                                                                                                                                                                                                                                                                                                                                                                                                                                                                                                                                                                                                                                                                                                                                                                                                                                                                                                                                                                                                                                                                                                                                                                                 | 0.003   |               |            |         |                          |  |  |  |                   |               |               |       |           |              |              |       |                     |              |              |       |                   |              |              |       |                   |               |               |       |            |              |              |     |               |              |              |       |               |              |              |       |
| Triangles                                          | 4.3 (SD 2.4)                                   | 1.7 (SD 1.0)                                                                                                                                                                                                                                                                                                                                                                                                                                                                                                                                                                                                                                                                                                                                                                                                                                                                                                                                                                                                                                                                                                                                                                                                                                                                                                                                                                                                                  | 0.001   |               |            |         |                          |  |  |  |                   |               |               |       |           |              |              |       |                     |              |              |       |                   |              |              |       |                   |               |               |       |            |              |              |     |               |              |              |       |               |              |              |       |
| Conceptual thinking                                | 4.7 (SD 1.8)                                   | 3.3 (SD 1.3)                                                                                                                                                                                                                                                                                                                                                                                                                                                                                                                                                                                                                                                                                                                                                                                                                                                                                                                                                                                                                                                                                                                                                                                                                                                                                                                                                                                                                  | 0.017   |               |            |         |                          |  |  |  |                   |               |               |       |           |              |              |       |                     |              |              |       |                   |              |              |       |                   |               |               |       |            |              |              |     |               |              |              |       |               |              |              |       |
| Pattern reasoning                                  | 8.1 (SD 1.8)                                   | 7.9 (SD 1.7)                                                                                                                                                                                                                                                                                                                                                                                                                                                                                                                                                                                                                                                                                                                                                                                                                                                                                                                                                                                                                                                                                                                                                                                                                                                                                                                                                                                                                  | 0.726   |               |            |         |                          |  |  |  |                   |               |               |       |           |              |              |       |                     |              |              |       |                   |              |              |       |                   |               |               |       |            |              |              |     |               |              |              |       |               |              |              |       |
| Short-term memory                                  | 21.7 (SD 5.6)                                  | 16.2 (SD 5.1)                                                                                                                                                                                                                                                                                                                                                                                                                                                                                                                                                                                                                                                                                                                                                                                                                                                                                                                                                                                                                                                                                                                                                                                                                                                                                                                                                                                                                 | 0.006   |               |            |         |                          |  |  |  |                   |               |               |       |           |              |              |       |                     |              |              |       |                   |              |              |       |                   |               |               |       |            |              |              |     |               |              |              |       |               |              |              |       |
| Word order                                         | 6.5 (SD 3.0)                                   | 4.8 (SD 2.0)                                                                                                                                                                                                                                                                                                                                                                                                                                                                                                                                                                                                                                                                                                                                                                                                                                                                                                                                                                                                                                                                                                                                                                                                                                                                                                                                                                                                                  | 0.1     |               |            |         |                          |  |  |  |                   |               |               |       |           |              |              |       |                     |              |              |       |                   |              |              |       |                   |               |               |       |            |              |              |     |               |              |              |       |               |              |              |       |
| Number recall                                      | 7.1 (SD 2.2)                                   | 5.4 (SD 2.5)                                                                                                                                                                                                                                                                                                                                                                                                                                                                                                                                                                                                                                                                                                                                                                                                                                                                                                                                                                                                                                                                                                                                                                                                                                                                                                                                                                                                                  | 0.025   |               |            |         |                          |  |  |  |                   |               |               |       |           |              |              |       |                     |              |              |       |                   |              |              |       |                   |               |               |       |            |              |              |     |               |              |              |       |               |              |              |       |
| Hand movement                                      | 8.1 (SD 2.1)                                   | 5.9 (SD 1.1)                                                                                                                                                                                                                                                                                                                                                                                                                                                                                                                                                                                                                                                                                                                                                                                                                                                                                                                                                                                                                                                                                                                                                                                                                                                                                                                                                                                                                  | 0.004   |               |            |         |                          |  |  |  |                   |               |               |       |           |              |              |       |                     |              |              |       |                   |              |              |       |                   |               |               |       |            |              |              |     |               |              |              |       |               |              |              |       |

| <p><b>Warsito et al 2012</b></p> <p>(-)</p>                                                                                                                        | <p>Indonesian Department of National Education – child development instrument</p> <p>(childhood)</p> | <table border="1"> <thead> <tr> <th></th> <th>Controls n=48</th> <th>Wasting n=3</th> <th>Severe Wasting n=2</th> </tr> </thead> <tbody> <tr> <td colspan="4"><b>Child development score:</b></td> </tr> <tr> <td>Percentage score</td> <td>68.7</td> <td>73.9</td> <td>73.8</td> </tr> <tr> <td colspan="4"><b>Adjusted analysis:</b><br/>(results unadjusted)</td> </tr> <tr> <td colspan="4"><b>Overall findings:</b><br/>Those with wasting in this study had better development scores than those without wasting. The study is limited by small case numbers.</td> </tr> </tbody> </table>                                                                                                                                                                                                                                                                                                                                                                                                                                                                                                                                                                  |                    | Controls n=48 | Wasting n=3 | Severe Wasting n=2 | <b>Child development score:</b>                  |  |  |  | Percentage score | 68.7              | 73.9             | 73.8  | <b>Adjusted analysis:</b><br>(results unadjusted) |                   |                  |       | <b>Overall findings:</b><br>Those with wasting in this study had better development scores than those without wasting. The study is limited by small case numbers. |                   |                  |       |                                 |                  |                  |       |                                  |                  |                  |       |                             |                  |                  |       |                                                   |  |  |  |                                                                                                                                                               |  |  |  |
|--------------------------------------------------------------------------------------------------------------------------------------------------------------------|------------------------------------------------------------------------------------------------------|-------------------------------------------------------------------------------------------------------------------------------------------------------------------------------------------------------------------------------------------------------------------------------------------------------------------------------------------------------------------------------------------------------------------------------------------------------------------------------------------------------------------------------------------------------------------------------------------------------------------------------------------------------------------------------------------------------------------------------------------------------------------------------------------------------------------------------------------------------------------------------------------------------------------------------------------------------------------------------------------------------------------------------------------------------------------------------------------------------------------------------------------------------------------|--------------------|---------------|-------------|--------------------|--------------------------------------------------|--|--|--|------------------|-------------------|------------------|-------|---------------------------------------------------|-------------------|------------------|-------|--------------------------------------------------------------------------------------------------------------------------------------------------------------------|-------------------|------------------|-------|---------------------------------|------------------|------------------|-------|----------------------------------|------------------|------------------|-------|-----------------------------|------------------|------------------|-------|---------------------------------------------------|--|--|--|---------------------------------------------------------------------------------------------------------------------------------------------------------------|--|--|--|
|                                                                                                                                                                    | Controls n=48                                                                                        | Wasting n=3                                                                                                                                                                                                                                                                                                                                                                                                                                                                                                                                                                                                                                                                                                                                                                                                                                                                                                                                                                                                                                                                                                                                                       | Severe Wasting n=2 |               |             |                    |                                                  |  |  |  |                  |                   |                  |       |                                                   |                   |                  |       |                                                                                                                                                                    |                   |                  |       |                                 |                  |                  |       |                                  |                  |                  |       |                             |                  |                  |       |                                                   |  |  |  |                                                                                                                                                               |  |  |  |
| <b>Child development score:</b>                                                                                                                                    |                                                                                                      |                                                                                                                                                                                                                                                                                                                                                                                                                                                                                                                                                                                                                                                                                                                                                                                                                                                                                                                                                                                                                                                                                                                                                                   |                    |               |             |                    |                                                  |  |  |  |                  |                   |                  |       |                                                   |                   |                  |       |                                                                                                                                                                    |                   |                  |       |                                 |                  |                  |       |                                  |                  |                  |       |                             |                  |                  |       |                                                   |  |  |  |                                                                                                                                                               |  |  |  |
| Percentage score                                                                                                                                                   | 68.7                                                                                                 | 73.9                                                                                                                                                                                                                                                                                                                                                                                                                                                                                                                                                                                                                                                                                                                                                                                                                                                                                                                                                                                                                                                                                                                                                              | 73.8               |               |             |                    |                                                  |  |  |  |                  |                   |                  |       |                                                   |                   |                  |       |                                                                                                                                                                    |                   |                  |       |                                 |                  |                  |       |                                  |                  |                  |       |                             |                  |                  |       |                                                   |  |  |  |                                                                                                                                                               |  |  |  |
| <b>Adjusted analysis:</b><br>(results unadjusted)                                                                                                                  |                                                                                                      |                                                                                                                                                                                                                                                                                                                                                                                                                                                                                                                                                                                                                                                                                                                                                                                                                                                                                                                                                                                                                                                                                                                                                                   |                    |               |             |                    |                                                  |  |  |  |                  |                   |                  |       |                                                   |                   |                  |       |                                                                                                                                                                    |                   |                  |       |                                 |                  |                  |       |                                  |                  |                  |       |                             |                  |                  |       |                                                   |  |  |  |                                                                                                                                                               |  |  |  |
| <b>Overall findings:</b><br>Those with wasting in this study had better development scores than those without wasting. The study is limited by small case numbers. |                                                                                                      |                                                                                                                                                                                                                                                                                                                                                                                                                                                                                                                                                                                                                                                                                                                                                                                                                                                                                                                                                                                                                                                                                                                                                                   |                    |               |             |                    |                                                  |  |  |  |                  |                   |                  |       |                                                   |                   |                  |       |                                                                                                                                                                    |                   |                  |       |                                 |                  |                  |       |                                  |                  |                  |       |                             |                  |                  |       |                                                   |  |  |  |                                                                                                                                                               |  |  |  |
| <p><b>Nassar et al 2012</b></p> <p>(-)</p>                                                                                                                         | <p>Stanford-Binet-Intelligence-Scale Arabic-Language-Test</p> <p>(childhood)</p>                     | <table border="1"> <thead> <tr> <th></th> <th>Controls n=30</th> <th>Cases n=33</th> <th>p value</th> </tr> </thead> <tbody> <tr> <td colspan="4"><b>Stanford-Binet-Intelligence-Scale (mean):</b></td> </tr> <tr> <td>IQ score</td> <td>92.07 (SD 11.52)</td> <td>80.52 (SD 13.65)</td> <td>0.001</td> </tr> <tr> <td>Mental age (months)</td> <td>50.50 (SD 13.40)</td> <td>42.58 (SD 8.66)</td> <td>0.017</td> </tr> <tr> <td colspan="4"><b>Arabic Language Test (mean):</b></td> </tr> <tr> <td>Receptive language age (months)</td> <td>51.67 (SD 13.98)</td> <td>40.09 (SD 17.36)</td> <td>0.005</td> </tr> <tr> <td>Expressive language age (months)</td> <td>51.67 (SD 14.23)</td> <td>40.76 (SD 16.74)</td> <td>0.003</td> </tr> <tr> <td>Total language age (months)</td> <td>51.40 (SD 14.15)</td> <td>40.00 (SD 17.66)</td> <td>0.007</td> </tr> <tr> <td colspan="4"><b>Adjusted analysis:</b><br/>(results unadjusted)</td> </tr> <tr> <td colspan="4"><b>Overall findings:</b><br/>Those with malnutrition had poorer scores for both tests than age- and sex-matched controls unadjusted for confounding variables.</td> </tr> </tbody> </table> |                    | Controls n=30 | Cases n=33  | p value            | <b>Stanford-Binet-Intelligence-Scale (mean):</b> |  |  |  | IQ score         | 92.07 (SD 11.52)  | 80.52 (SD 13.65) | 0.001 | Mental age (months)                               | 50.50 (SD 13.40)  | 42.58 (SD 8.66)  | 0.017 | <b>Arabic Language Test (mean):</b>                                                                                                                                |                   |                  |       | Receptive language age (months) | 51.67 (SD 13.98) | 40.09 (SD 17.36) | 0.005 | Expressive language age (months) | 51.67 (SD 14.23) | 40.76 (SD 16.74) | 0.003 | Total language age (months) | 51.40 (SD 14.15) | 40.00 (SD 17.66) | 0.007 | <b>Adjusted analysis:</b><br>(results unadjusted) |  |  |  | <b>Overall findings:</b><br>Those with malnutrition had poorer scores for both tests than age- and sex-matched controls unadjusted for confounding variables. |  |  |  |
|                                                                                                                                                                    | Controls n=30                                                                                        | Cases n=33                                                                                                                                                                                                                                                                                                                                                                                                                                                                                                                                                                                                                                                                                                                                                                                                                                                                                                                                                                                                                                                                                                                                                        | p value            |               |             |                    |                                                  |  |  |  |                  |                   |                  |       |                                                   |                   |                  |       |                                                                                                                                                                    |                   |                  |       |                                 |                  |                  |       |                                  |                  |                  |       |                             |                  |                  |       |                                                   |  |  |  |                                                                                                                                                               |  |  |  |
| <b>Stanford-Binet-Intelligence-Scale (mean):</b>                                                                                                                   |                                                                                                      |                                                                                                                                                                                                                                                                                                                                                                                                                                                                                                                                                                                                                                                                                                                                                                                                                                                                                                                                                                                                                                                                                                                                                                   |                    |               |             |                    |                                                  |  |  |  |                  |                   |                  |       |                                                   |                   |                  |       |                                                                                                                                                                    |                   |                  |       |                                 |                  |                  |       |                                  |                  |                  |       |                             |                  |                  |       |                                                   |  |  |  |                                                                                                                                                               |  |  |  |
| IQ score                                                                                                                                                           | 92.07 (SD 11.52)                                                                                     | 80.52 (SD 13.65)                                                                                                                                                                                                                                                                                                                                                                                                                                                                                                                                                                                                                                                                                                                                                                                                                                                                                                                                                                                                                                                                                                                                                  | 0.001              |               |             |                    |                                                  |  |  |  |                  |                   |                  |       |                                                   |                   |                  |       |                                                                                                                                                                    |                   |                  |       |                                 |                  |                  |       |                                  |                  |                  |       |                             |                  |                  |       |                                                   |  |  |  |                                                                                                                                                               |  |  |  |
| Mental age (months)                                                                                                                                                | 50.50 (SD 13.40)                                                                                     | 42.58 (SD 8.66)                                                                                                                                                                                                                                                                                                                                                                                                                                                                                                                                                                                                                                                                                                                                                                                                                                                                                                                                                                                                                                                                                                                                                   | 0.017              |               |             |                    |                                                  |  |  |  |                  |                   |                  |       |                                                   |                   |                  |       |                                                                                                                                                                    |                   |                  |       |                                 |                  |                  |       |                                  |                  |                  |       |                             |                  |                  |       |                                                   |  |  |  |                                                                                                                                                               |  |  |  |
| <b>Arabic Language Test (mean):</b>                                                                                                                                |                                                                                                      |                                                                                                                                                                                                                                                                                                                                                                                                                                                                                                                                                                                                                                                                                                                                                                                                                                                                                                                                                                                                                                                                                                                                                                   |                    |               |             |                    |                                                  |  |  |  |                  |                   |                  |       |                                                   |                   |                  |       |                                                                                                                                                                    |                   |                  |       |                                 |                  |                  |       |                                  |                  |                  |       |                             |                  |                  |       |                                                   |  |  |  |                                                                                                                                                               |  |  |  |
| Receptive language age (months)                                                                                                                                    | 51.67 (SD 13.98)                                                                                     | 40.09 (SD 17.36)                                                                                                                                                                                                                                                                                                                                                                                                                                                                                                                                                                                                                                                                                                                                                                                                                                                                                                                                                                                                                                                                                                                                                  | 0.005              |               |             |                    |                                                  |  |  |  |                  |                   |                  |       |                                                   |                   |                  |       |                                                                                                                                                                    |                   |                  |       |                                 |                  |                  |       |                                  |                  |                  |       |                             |                  |                  |       |                                                   |  |  |  |                                                                                                                                                               |  |  |  |
| Expressive language age (months)                                                                                                                                   | 51.67 (SD 14.23)                                                                                     | 40.76 (SD 16.74)                                                                                                                                                                                                                                                                                                                                                                                                                                                                                                                                                                                                                                                                                                                                                                                                                                                                                                                                                                                                                                                                                                                                                  | 0.003              |               |             |                    |                                                  |  |  |  |                  |                   |                  |       |                                                   |                   |                  |       |                                                                                                                                                                    |                   |                  |       |                                 |                  |                  |       |                                  |                  |                  |       |                             |                  |                  |       |                                                   |  |  |  |                                                                                                                                                               |  |  |  |
| Total language age (months)                                                                                                                                        | 51.40 (SD 14.15)                                                                                     | 40.00 (SD 17.66)                                                                                                                                                                                                                                                                                                                                                                                                                                                                                                                                                                                                                                                                                                                                                                                                                                                                                                                                                                                                                                                                                                                                                  | 0.007              |               |             |                    |                                                  |  |  |  |                  |                   |                  |       |                                                   |                   |                  |       |                                                                                                                                                                    |                   |                  |       |                                 |                  |                  |       |                                  |                  |                  |       |                             |                  |                  |       |                                                   |  |  |  |                                                                                                                                                               |  |  |  |
| <b>Adjusted analysis:</b><br>(results unadjusted)                                                                                                                  |                                                                                                      |                                                                                                                                                                                                                                                                                                                                                                                                                                                                                                                                                                                                                                                                                                                                                                                                                                                                                                                                                                                                                                                                                                                                                                   |                    |               |             |                    |                                                  |  |  |  |                  |                   |                  |       |                                                   |                   |                  |       |                                                                                                                                                                    |                   |                  |       |                                 |                  |                  |       |                                  |                  |                  |       |                             |                  |                  |       |                                                   |  |  |  |                                                                                                                                                               |  |  |  |
| <b>Overall findings:</b><br>Those with malnutrition had poorer scores for both tests than age- and sex-matched controls unadjusted for confounding variables.      |                                                                                                      |                                                                                                                                                                                                                                                                                                                                                                                                                                                                                                                                                                                                                                                                                                                                                                                                                                                                                                                                                                                                                                                                                                                                                                   |                    |               |             |                    |                                                  |  |  |  |                  |                   |                  |       |                                                   |                   |                  |       |                                                                                                                                                                    |                   |                  |       |                                 |                  |                  |       |                                  |                  |                  |       |                             |                  |                  |       |                                                   |  |  |  |                                                                                                                                                               |  |  |  |
| <p><b>Liu et al 2003</b></p> <p>(++)</p>                                                                                                                           | <p>Bohem Test<br/>WISC<br/>Academic Tests<br/>Holborn-Reading Scale<br/>Trail Making Test</p>        | <table border="1"> <thead> <tr> <th></th> <th>Control n=837</th> <th>Cases n=253</th> <th>p value</th> </tr> </thead> <tbody> <tr> <td colspan="4"><b>Age 3y:</b></td> </tr> <tr> <td>Verbal IQ</td> <td>100.92 (SD 15.04)</td> <td>96.93 (SD 14.36)</td> <td>0.001</td> </tr> <tr> <td>Spatial IQ</td> <td>100.34 (SD 15.21)</td> <td>98.95 (SD 13.52)</td> <td>0.18</td> </tr> <tr> <td>Full-Scale IQ</td> <td>100.92 (SD 15.04)</td> <td>96.93 (SD 14.36)</td> <td>0.001</td> </tr> </tbody> </table>                                                                                                                                                                                                                                                                                                                                                                                                                                                                                                                                                                                                                                                          |                    | Control n=837 | Cases n=253 | p value            | <b>Age 3y:</b>                                   |  |  |  | Verbal IQ        | 100.92 (SD 15.04) | 96.93 (SD 14.36) | 0.001 | Spatial IQ                                        | 100.34 (SD 15.21) | 98.95 (SD 13.52) | 0.18  | Full-Scale IQ                                                                                                                                                      | 100.92 (SD 15.04) | 96.93 (SD 14.36) | 0.001 |                                 |                  |                  |       |                                  |                  |                  |       |                             |                  |                  |       |                                                   |  |  |  |                                                                                                                                                               |  |  |  |
|                                                                                                                                                                    | Control n=837                                                                                        | Cases n=253                                                                                                                                                                                                                                                                                                                                                                                                                                                                                                                                                                                                                                                                                                                                                                                                                                                                                                                                                                                                                                                                                                                                                       | p value            |               |             |                    |                                                  |  |  |  |                  |                   |                  |       |                                                   |                   |                  |       |                                                                                                                                                                    |                   |                  |       |                                 |                  |                  |       |                                  |                  |                  |       |                             |                  |                  |       |                                                   |  |  |  |                                                                                                                                                               |  |  |  |
| <b>Age 3y:</b>                                                                                                                                                     |                                                                                                      |                                                                                                                                                                                                                                                                                                                                                                                                                                                                                                                                                                                                                                                                                                                                                                                                                                                                                                                                                                                                                                                                                                                                                                   |                    |               |             |                    |                                                  |  |  |  |                  |                   |                  |       |                                                   |                   |                  |       |                                                                                                                                                                    |                   |                  |       |                                 |                  |                  |       |                                  |                  |                  |       |                             |                  |                  |       |                                                   |  |  |  |                                                                                                                                                               |  |  |  |
| Verbal IQ                                                                                                                                                          | 100.92 (SD 15.04)                                                                                    | 96.93 (SD 14.36)                                                                                                                                                                                                                                                                                                                                                                                                                                                                                                                                                                                                                                                                                                                                                                                                                                                                                                                                                                                                                                                                                                                                                  | 0.001              |               |             |                    |                                                  |  |  |  |                  |                   |                  |       |                                                   |                   |                  |       |                                                                                                                                                                    |                   |                  |       |                                 |                  |                  |       |                                  |                  |                  |       |                             |                  |                  |       |                                                   |  |  |  |                                                                                                                                                               |  |  |  |
| Spatial IQ                                                                                                                                                         | 100.34 (SD 15.21)                                                                                    | 98.95 (SD 13.52)                                                                                                                                                                                                                                                                                                                                                                                                                                                                                                                                                                                                                                                                                                                                                                                                                                                                                                                                                                                                                                                                                                                                                  | 0.18               |               |             |                    |                                                  |  |  |  |                  |                   |                  |       |                                                   |                   |                  |       |                                                                                                                                                                    |                   |                  |       |                                 |                  |                  |       |                                  |                  |                  |       |                             |                  |                  |       |                                                   |  |  |  |                                                                                                                                                               |  |  |  |
| Full-Scale IQ                                                                                                                                                      | 100.92 (SD 15.04)                                                                                    | 96.93 (SD 14.36)                                                                                                                                                                                                                                                                                                                                                                                                                                                                                                                                                                                                                                                                                                                                                                                                                                                                                                                                                                                                                                                                                                                                                  | 0.001              |               |             |                    |                                                  |  |  |  |                  |                   |                  |       |                                                   |                   |                  |       |                                                                                                                                                                    |                   |                  |       |                                 |                  |                  |       |                                  |                  |                  |       |                             |                  |                  |       |                                                   |  |  |  |                                                                                                                                                               |  |  |  |

|                                                                                                                                               | (adolescence)                                                        | <p><b>Age 11y:</b></p> <table> <tr> <td>Verbal IQ</td> <td>100.90 (SD 14.41)</td> <td>96.16 (SD 15.40)</td> <td>0.001</td> </tr> <tr> <td>Spatial IQ</td> <td>100.75 (SD 14.55)</td> <td>96.23 (SD 15.41)</td> <td>0.001</td> </tr> <tr> <td>Full-Scale IQ</td> <td>100.88 (SD 14.43)</td> <td>95.83 (SD 15.49)</td> <td>0.001</td> </tr> <tr> <td>Reading</td> <td>95.11 (SD 55.30)</td> <td>76.81 (SD 56.58)</td> <td>0.001</td> </tr> <tr> <td>School performance</td> <td>10.33 (SD 7.07)</td> <td>7.63 (SD 6.48)</td> <td>0.001</td> </tr> <tr> <td>Trails A</td> <td>-0.049 (SD 0.95)</td> <td>0.24 (SD 1.10)</td> <td>0.001</td> </tr> <tr> <td>Trails B</td> <td>-0.023 (SD 0.98)</td> <td>0.20 (SD 1.07)</td> <td>0.004</td> </tr> </table> <p><b>Adjusted analysis:</b><br/>Differences remain after controlling for psychosocial adversity.</p> <p><b>Overall Findings:</b><br/>Malnourished children had poorer cognition and school/academic performance at both ages after controlling for psychosocial adversity.</p> | Verbal IQ | 100.90 (SD 14.41) | 96.16 (SD 15.40) | 0.001   | Spatial IQ                | 100.75 (SD 14.55) | 96.23 (SD 15.41) | 0.001 | Full-Scale IQ          | 100.88 (SD 14.43) | 95.83 (SD 15.49) | 0.001 | Reading                 | 95.11 (SD 55.30) | 76.81 (SD 56.58) | 0.001 | School performance | 10.33 (SD 7.07) | 7.63 (SD 6.48) | 0.001 | Trails A                                                                                                                                      | -0.049 (SD 0.95) | 0.24 (SD 1.10) | 0.001 | Trails B                                           | -0.023 (SD 0.98) | 0.20 (SD 1.07) | 0.004 |                          |  |  |  |
|-----------------------------------------------------------------------------------------------------------------------------------------------|----------------------------------------------------------------------|--------------------------------------------------------------------------------------------------------------------------------------------------------------------------------------------------------------------------------------------------------------------------------------------------------------------------------------------------------------------------------------------------------------------------------------------------------------------------------------------------------------------------------------------------------------------------------------------------------------------------------------------------------------------------------------------------------------------------------------------------------------------------------------------------------------------------------------------------------------------------------------------------------------------------------------------------------------------------------------------------------------------------------------|-----------|-------------------|------------------|---------|---------------------------|-------------------|------------------|-------|------------------------|-------------------|------------------|-------|-------------------------|------------------|------------------|-------|--------------------|-----------------|----------------|-------|-----------------------------------------------------------------------------------------------------------------------------------------------|------------------|----------------|-------|----------------------------------------------------|------------------|----------------|-------|--------------------------|--|--|--|
| Verbal IQ                                                                                                                                     | 100.90 (SD 14.41)                                                    | 96.16 (SD 15.40)                                                                                                                                                                                                                                                                                                                                                                                                                                                                                                                                                                                                                                                                                                                                                                                                                                                                                                                                                                                                                     | 0.001     |                   |                  |         |                           |                   |                  |       |                        |                   |                  |       |                         |                  |                  |       |                    |                 |                |       |                                                                                                                                               |                  |                |       |                                                    |                  |                |       |                          |  |  |  |
| Spatial IQ                                                                                                                                    | 100.75 (SD 14.55)                                                    | 96.23 (SD 15.41)                                                                                                                                                                                                                                                                                                                                                                                                                                                                                                                                                                                                                                                                                                                                                                                                                                                                                                                                                                                                                     | 0.001     |                   |                  |         |                           |                   |                  |       |                        |                   |                  |       |                         |                  |                  |       |                    |                 |                |       |                                                                                                                                               |                  |                |       |                                                    |                  |                |       |                          |  |  |  |
| Full-Scale IQ                                                                                                                                 | 100.88 (SD 14.43)                                                    | 95.83 (SD 15.49)                                                                                                                                                                                                                                                                                                                                                                                                                                                                                                                                                                                                                                                                                                                                                                                                                                                                                                                                                                                                                     | 0.001     |                   |                  |         |                           |                   |                  |       |                        |                   |                  |       |                         |                  |                  |       |                    |                 |                |       |                                                                                                                                               |                  |                |       |                                                    |                  |                |       |                          |  |  |  |
| Reading                                                                                                                                       | 95.11 (SD 55.30)                                                     | 76.81 (SD 56.58)                                                                                                                                                                                                                                                                                                                                                                                                                                                                                                                                                                                                                                                                                                                                                                                                                                                                                                                                                                                                                     | 0.001     |                   |                  |         |                           |                   |                  |       |                        |                   |                  |       |                         |                  |                  |       |                    |                 |                |       |                                                                                                                                               |                  |                |       |                                                    |                  |                |       |                          |  |  |  |
| School performance                                                                                                                            | 10.33 (SD 7.07)                                                      | 7.63 (SD 6.48)                                                                                                                                                                                                                                                                                                                                                                                                                                                                                                                                                                                                                                                                                                                                                                                                                                                                                                                                                                                                                       | 0.001     |                   |                  |         |                           |                   |                  |       |                        |                   |                  |       |                         |                  |                  |       |                    |                 |                |       |                                                                                                                                               |                  |                |       |                                                    |                  |                |       |                          |  |  |  |
| Trails A                                                                                                                                      | -0.049 (SD 0.95)                                                     | 0.24 (SD 1.10)                                                                                                                                                                                                                                                                                                                                                                                                                                                                                                                                                                                                                                                                                                                                                                                                                                                                                                                                                                                                                       | 0.001     |                   |                  |         |                           |                   |                  |       |                        |                   |                  |       |                         |                  |                  |       |                    |                 |                |       |                                                                                                                                               |                  |                |       |                                                    |                  |                |       |                          |  |  |  |
| Trails B                                                                                                                                      | -0.023 (SD 0.98)                                                     | 0.20 (SD 1.07)                                                                                                                                                                                                                                                                                                                                                                                                                                                                                                                                                                                                                                                                                                                                                                                                                                                                                                                                                                                                                       | 0.004     |                   |                  |         |                           |                   |                  |       |                        |                   |                  |       |                         |                  |                  |       |                    |                 |                |       |                                                                                                                                               |                  |                |       |                                                    |                  |                |       |                          |  |  |  |
| <b>Perales et al 1996</b><br><br>(+)                                                                                                          | Continuous Performance Task<br>Anstey Domino Test<br><br>(childhood) | <table> <thead> <tr> <th></th> <th>Controls n=40</th> <th>Cases n=40</th> <th>p value</th> </tr> </thead> <tbody> <tr> <td colspan="4"><b>Short-term Memory:</b></td> </tr> <tr> <td>Number-of-digits score</td> <td>4.5 (SD 0.87)</td> <td>3.8 (SD 0.88)</td> <td>&lt;0.05</td> </tr> <tr> <td colspan="4"><b>Problem-Solving:</b></td> </tr> <tr> <td>Correct score</td> <td>4.7 (SD 2.1)</td> <td>3.4 (SD 1.4)</td> <td>&lt;0.05</td> </tr> <tr> <td colspan="4"><b>Attention:</b><br/>No differences in correct answers between groups. Lower performance in cases response time for correct answers (p&lt;0.02).</td> </tr> <tr> <td colspan="4"><b>Adjusted analysis:</b><br/>(unadjusted analysis)</td> </tr> <tr> <td colspan="4"><b>Overall Findings:</b></td> </tr> </tbody> </table>                                                                                                                                                                                                                                      |           | Controls n=40     | Cases n=40       | p value | <b>Short-term Memory:</b> |                   |                  |       | Number-of-digits score | 4.5 (SD 0.87)     | 3.8 (SD 0.88)    | <0.05 | <b>Problem-Solving:</b> |                  |                  |       | Correct score      | 4.7 (SD 2.1)    | 3.4 (SD 1.4)   | <0.05 | <b>Attention:</b><br>No differences in correct answers between groups. Lower performance in cases response time for correct answers (p<0.02). |                  |                |       | <b>Adjusted analysis:</b><br>(unadjusted analysis) |                  |                |       | <b>Overall Findings:</b> |  |  |  |
|                                                                                                                                               | Controls n=40                                                        | Cases n=40                                                                                                                                                                                                                                                                                                                                                                                                                                                                                                                                                                                                                                                                                                                                                                                                                                                                                                                                                                                                                           | p value   |                   |                  |         |                           |                   |                  |       |                        |                   |                  |       |                         |                  |                  |       |                    |                 |                |       |                                                                                                                                               |                  |                |       |                                                    |                  |                |       |                          |  |  |  |
| <b>Short-term Memory:</b>                                                                                                                     |                                                                      |                                                                                                                                                                                                                                                                                                                                                                                                                                                                                                                                                                                                                                                                                                                                                                                                                                                                                                                                                                                                                                      |           |                   |                  |         |                           |                   |                  |       |                        |                   |                  |       |                         |                  |                  |       |                    |                 |                |       |                                                                                                                                               |                  |                |       |                                                    |                  |                |       |                          |  |  |  |
| Number-of-digits score                                                                                                                        | 4.5 (SD 0.87)                                                        | 3.8 (SD 0.88)                                                                                                                                                                                                                                                                                                                                                                                                                                                                                                                                                                                                                                                                                                                                                                                                                                                                                                                                                                                                                        | <0.05     |                   |                  |         |                           |                   |                  |       |                        |                   |                  |       |                         |                  |                  |       |                    |                 |                |       |                                                                                                                                               |                  |                |       |                                                    |                  |                |       |                          |  |  |  |
| <b>Problem-Solving:</b>                                                                                                                       |                                                                      |                                                                                                                                                                                                                                                                                                                                                                                                                                                                                                                                                                                                                                                                                                                                                                                                                                                                                                                                                                                                                                      |           |                   |                  |         |                           |                   |                  |       |                        |                   |                  |       |                         |                  |                  |       |                    |                 |                |       |                                                                                                                                               |                  |                |       |                                                    |                  |                |       |                          |  |  |  |
| Correct score                                                                                                                                 | 4.7 (SD 2.1)                                                         | 3.4 (SD 1.4)                                                                                                                                                                                                                                                                                                                                                                                                                                                                                                                                                                                                                                                                                                                                                                                                                                                                                                                                                                                                                         | <0.05     |                   |                  |         |                           |                   |                  |       |                        |                   |                  |       |                         |                  |                  |       |                    |                 |                |       |                                                                                                                                               |                  |                |       |                                                    |                  |                |       |                          |  |  |  |
| <b>Attention:</b><br>No differences in correct answers between groups. Lower performance in cases response time for correct answers (p<0.02). |                                                                      |                                                                                                                                                                                                                                                                                                                                                                                                                                                                                                                                                                                                                                                                                                                                                                                                                                                                                                                                                                                                                                      |           |                   |                  |         |                           |                   |                  |       |                        |                   |                  |       |                         |                  |                  |       |                    |                 |                |       |                                                                                                                                               |                  |                |       |                                                    |                  |                |       |                          |  |  |  |
| <b>Adjusted analysis:</b><br>(unadjusted analysis)                                                                                            |                                                                      |                                                                                                                                                                                                                                                                                                                                                                                                                                                                                                                                                                                                                                                                                                                                                                                                                                                                                                                                                                                                                                      |           |                   |                  |         |                           |                   |                  |       |                        |                   |                  |       |                         |                  |                  |       |                    |                 |                |       |                                                                                                                                               |                  |                |       |                                                    |                  |                |       |                          |  |  |  |
| <b>Overall Findings:</b>                                                                                                                      |                                                                      |                                                                                                                                                                                                                                                                                                                                                                                                                                                                                                                                                                                                                                                                                                                                                                                                                                                                                                                                                                                                                                      |           |                   |                  |         |                           |                   |                  |       |                        |                   |                  |       |                         |                  |                  |       |                    |                 |                |       |                                                                                                                                               |                  |                |       |                                                    |                  |                |       |                          |  |  |  |

|                                                                  |                                                                                                  | Cases had lower memory scores and problem solving scores unadjusted for confounding variables.<br>Cases had worse performance than controls for response times in the attention test unadjusted for confounding variables.                                                                                                                                                                                                                                                                                                                                                                                                                                                                                                                                                                                                                                                             |  |               |            |                                                                  |  |  |            |                 |                 |                                           |  |  |                        |  |  |              |                |                |
|------------------------------------------------------------------|--------------------------------------------------------------------------------------------------|----------------------------------------------------------------------------------------------------------------------------------------------------------------------------------------------------------------------------------------------------------------------------------------------------------------------------------------------------------------------------------------------------------------------------------------------------------------------------------------------------------------------------------------------------------------------------------------------------------------------------------------------------------------------------------------------------------------------------------------------------------------------------------------------------------------------------------------------------------------------------------------|--|---------------|------------|------------------------------------------------------------------|--|--|------------|-----------------|-----------------|-------------------------------------------|--|--|------------------------|--|--|--------------|----------------|----------------|
| <b>Barbados Nutrition Study</b>                                  |                                                                                                  |                                                                                                                                                                                                                                                                                                                                                                                                                                                                                                                                                                                                                                                                                                                                                                                                                                                                                        |  |               |            |                                                                  |  |  |            |                 |                 |                                           |  |  |                        |  |  |              |                |                |
| <b>Waber (1)<br/><i>et al 2014*</i></b><br><br><b>(++)</b>       | Academic achievement, WASI<br><br>(adulthood)                                                    | <p><b><u>WRAT-III academic achievement score (adjusted odds ratio):</u></b><br/> Reading OR 3.44 [95% CI 1.88–6.30]<br/> Spelling OR 6.10 [95% CI 3.34–11.16]<br/> Calculation OR 6.23 [95% CI 3.15–12.32]</p> <p><b><u>WASI score (adjusted odds ratio):</u></b><br/> IQ OR 9.18 [95% CI 3.50, 24.13]</p> <p><b><u>Adjusted analysis:</u></b><br/> (Results adjusted for childhood standard of living)</p> <p><b><u>Sample size:</u></b><br/> Cases n=77, Controls n=59</p> <p><b><u>Overall findings:</u></b><br/> Academic skills and IQ were lower in the malnourished group compared to controls after adjusting for childhood standard of living.</p>                                                                                                                                                                                                                            |  |               |            |                                                                  |  |  |            |                 |                 |                                           |  |  |                        |  |  |              |                |                |
| <b>Waber (2)<br/><i>et al 2014*</i></b><br><br><b>(++)</b>       | WAIS-III, D-KEFS, WRAML-II,<br>Wisconsin card sorting,<br>Metacognitive index<br><br>(adulthood) | <table style="width: 100%; border-collapse: collapse;"> <thead> <tr> <th style="width: 30%;"></th> <th style="width: 35%; text-align: center; border-bottom: 1px solid black;">Controls n=59</th> <th style="width: 35%; text-align: center; border-bottom: 1px solid black;">Cases n=77</th> </tr> </thead> <tbody> <tr> <td><b><u>Metacognitive index (General executive composite):</u></b></td> <td></td> <td></td> </tr> <tr> <td>Mean score</td> <td style="text-align: center;">41.81 (SD 6.05)</td> <td style="text-align: center;">47.36 (SD 9.33)</td> </tr> <tr> <td>Adjusted Mean difference<br/>3.70 (p&lt;0.05)</td> <td></td> <td></td> </tr> <tr> <td><b><u>WRAML-2:</u></b></td> <td></td> <td></td> </tr> <tr> <td>Scaled score</td> <td style="text-align: center;">8.49 (SD 1.81)</td> <td style="text-align: center;">7.45 (SD 2.28)</td> </tr> </tbody> </table> |  | Controls n=59 | Cases n=77 | <b><u>Metacognitive index (General executive composite):</u></b> |  |  | Mean score | 41.81 (SD 6.05) | 47.36 (SD 9.33) | Adjusted Mean difference<br>3.70 (p<0.05) |  |  | <b><u>WRAML-2:</u></b> |  |  | Scaled score | 8.49 (SD 1.81) | 7.45 (SD 2.28) |
|                                                                  | Controls n=59                                                                                    | Cases n=77                                                                                                                                                                                                                                                                                                                                                                                                                                                                                                                                                                                                                                                                                                                                                                                                                                                                             |  |               |            |                                                                  |  |  |            |                 |                 |                                           |  |  |                        |  |  |              |                |                |
| <b><u>Metacognitive index (General executive composite):</u></b> |                                                                                                  |                                                                                                                                                                                                                                                                                                                                                                                                                                                                                                                                                                                                                                                                                                                                                                                                                                                                                        |  |               |            |                                                                  |  |  |            |                 |                 |                                           |  |  |                        |  |  |              |                |                |
| Mean score                                                       | 41.81 (SD 6.05)                                                                                  | 47.36 (SD 9.33)                                                                                                                                                                                                                                                                                                                                                                                                                                                                                                                                                                                                                                                                                                                                                                                                                                                                        |  |               |            |                                                                  |  |  |            |                 |                 |                                           |  |  |                        |  |  |              |                |                |
| Adjusted Mean difference<br>3.70 (p<0.05)                        |                                                                                                  |                                                                                                                                                                                                                                                                                                                                                                                                                                                                                                                                                                                                                                                                                                                                                                                                                                                                                        |  |               |            |                                                                  |  |  |            |                 |                 |                                           |  |  |                        |  |  |              |                |                |
| <b><u>WRAML-2:</u></b>                                           |                                                                                                  |                                                                                                                                                                                                                                                                                                                                                                                                                                                                                                                                                                                                                                                                                                                                                                                                                                                                                        |  |               |            |                                                                  |  |  |            |                 |                 |                                           |  |  |                        |  |  |              |                |                |
| Scaled score                                                     | 8.49 (SD 1.81)                                                                                   | 7.45 (SD 2.28)                                                                                                                                                                                                                                                                                                                                                                                                                                                                                                                                                                                                                                                                                                                                                                                                                                                                         |  |               |            |                                                                  |  |  |            |                 |                 |                                           |  |  |                        |  |  |              |                |                |

|                                           |                                                                            | <p>Adjusted Mean difference<br/>-0.42 (p&gt;0.05)</p> <p><b>Wisconsin card sorting:</b><br/>Total errors score                      94.56 (SD 12.70)                      80.67 (SD 12.53)</p> <p>Adjusted Mean difference<br/>-9.74 (p&lt;0.001)</p> <p><b>Adjusted analysis</b><br/>(results adjusted for childhood standard of living and IQ)</p> <p>Significant differences persisted for the WAIS Digit Symbol and Letter-Number, D-KEFS Trails (Numbers) , Verbal Fluency (Letters) and Rey-Osterrieth Complex Figure after adjusting for covariates</p> <p><b>Overall findings:</b><br/>Malnutrition during infancy is associated with impaired IQ in adulthood. In models adjusted only for childhood standard of living, the malnutrition group performed more poorly on nearly all measures. In the IQ-adjusted models, significant differences persisted for the WAIS Digit Symbol and Letter-Number, D-KEFS Trails (Numbers) and Verbal Fluency (Letters), Rey-Osterrieth Complex Figure, and Wisconsin Card Sorting Test.</p> |         |               |                   |         |              |  |  |  |    |                   |                  |         |                              |  |  |  |       |                   |                |         |
|-------------------------------------------|----------------------------------------------------------------------------|--------------------------------------------------------------------------------------------------------------------------------------------------------------------------------------------------------------------------------------------------------------------------------------------------------------------------------------------------------------------------------------------------------------------------------------------------------------------------------------------------------------------------------------------------------------------------------------------------------------------------------------------------------------------------------------------------------------------------------------------------------------------------------------------------------------------------------------------------------------------------------------------------------------------------------------------------------------------------------------------------------------------------------------------|---------|---------------|-------------------|---------|--------------|--|--|--|----|-------------------|------------------|---------|------------------------------|--|--|--|-------|-------------------|----------------|---------|
| <b>Waber et al 2011</b><br><br><b>(+)</b> | WISC, Common entrance examination (local school test)<br><br>(adolescence) | <table border="1"> <thead> <tr> <th></th> <th>Controls n=60</th> <th>Malnutrition n=56</th> <th>p value</th> </tr> </thead> <tbody> <tr> <td><b>WISC:</b></td> <td></td> <td></td> <td></td> </tr> <tr> <td>IQ</td> <td>104.92 (SD 10.54)</td> <td>92.54 (SD 13.86)</td> <td>&lt;0.0001</td> </tr> <tr> <td><b>Common Entrance Exam:</b></td> <td></td> <td></td> <td></td> </tr> <tr> <td>Score</td> <td>210.42 (SD 22.13)</td> <td>184.10 (29.27)</td> <td>&lt;0.0001</td> </tr> </tbody> </table> <p><b>Adjusted analysis:</b></p>                                                                                                                                                                                                                                                                                                                                                                                                                                                                                                      |         | Controls n=60 | Malnutrition n=56 | p value | <b>WISC:</b> |  |  |  | IQ | 104.92 (SD 10.54) | 92.54 (SD 13.86) | <0.0001 | <b>Common Entrance Exam:</b> |  |  |  | Score | 210.42 (SD 22.13) | 184.10 (29.27) | <0.0001 |
|                                           | Controls n=60                                                              | Malnutrition n=56                                                                                                                                                                                                                                                                                                                                                                                                                                                                                                                                                                                                                                                                                                                                                                                                                                                                                                                                                                                                                          | p value |               |                   |         |              |  |  |  |    |                   |                  |         |                              |  |  |  |       |                   |                |         |
| <b>WISC:</b>                              |                                                                            |                                                                                                                                                                                                                                                                                                                                                                                                                                                                                                                                                                                                                                                                                                                                                                                                                                                                                                                                                                                                                                            |         |               |                   |         |              |  |  |  |    |                   |                  |         |                              |  |  |  |       |                   |                |         |
| IQ                                        | 104.92 (SD 10.54)                                                          | 92.54 (SD 13.86)                                                                                                                                                                                                                                                                                                                                                                                                                                                                                                                                                                                                                                                                                                                                                                                                                                                                                                                                                                                                                           | <0.0001 |               |                   |         |              |  |  |  |    |                   |                  |         |                              |  |  |  |       |                   |                |         |
| <b>Common Entrance Exam:</b>              |                                                                            |                                                                                                                                                                                                                                                                                                                                                                                                                                                                                                                                                                                                                                                                                                                                                                                                                                                                                                                                                                                                                                            |         |               |                   |         |              |  |  |  |    |                   |                  |         |                              |  |  |  |       |                   |                |         |
| Score                                     | 210.42 (SD 22.13)                                                          | 184.10 (29.27)                                                                                                                                                                                                                                                                                                                                                                                                                                                                                                                                                                                                                                                                                                                                                                                                                                                                                                                                                                                                                             | <0.0001 |               |                   |         |              |  |  |  |    |                   |                  |         |                              |  |  |  |       |                   |                |         |

|  |  |                                                                                                                                                                                                                                                                                                        |
|--|--|--------------------------------------------------------------------------------------------------------------------------------------------------------------------------------------------------------------------------------------------------------------------------------------------------------|
|  |  | <p>Early malnutrition predicted cognitive function and exam score in childhood after adjusting for childhood standard of living.</p> <p><b>Overall findings:</b><br/>Malnutrition predicted common entrance exam score and cognitive functioning after adjusting for childhood standard of living.</p> |
|--|--|--------------------------------------------------------------------------------------------------------------------------------------------------------------------------------------------------------------------------------------------------------------------------------------------------------|

\*Studies are drawn from the same Barbados Nutrition Study

95% CI – 95% Confidence Intervals, CANTAB – Cambridge Neuropsychological Test Automated Battery, D-KEFS – Delis-Kaplan Executive Function System, MMSE – Mini-Mental State Exam, OR – Odds Ratio, SD – Standard Deviation, WAIS-III – Wechsler Adult Intelligence Scale-III, WASI – Adult IQ: Weschler Abbreviated Scale of Intelligence – Vocabulary and Matrix Reasoning subsets, WISC – Weschler Intelligence Scale, WPPSI-IV – Wechsler Preschool and Primary Scale of Intelligence Fourth Edition, WRAML-II – Wide Range Assessment of Memory and Learning-II, WRAT-III – Academic achievement: Wide Range Achievement Test-III – Reading Spelling and Calculation subsets

Supplementary Table 5 - Results from studies assessing mental health outcomes in those exposed to childhood malnutrition compared to controls

| Study (quality)                    | Mental health tool/measurement (outcome age) | Summary of results       |                                       |                                       |
|------------------------------------|----------------------------------------------|--------------------------|---------------------------------------|---------------------------------------|
|                                    |                                              | Controls n=1270          | Wasting n=23                          |                                       |
| Chen <i>et al</i> 2021<br><br>(++) | SDQ<br><br>(childhood)                       | <b>SDQ:</b>              |                                       |                                       |
|                                    |                                              | Prosocial score          | 6.83 (SD 0.06)<br>[95% CI 6.71, 6.95] | 6.70 (SD 0.42)<br>[95% CI 5.86, 7.53] |
|                                    |                                              | Total difficulties score | 12.35 (SD 0.13)                       | 12.09 (SD 1.09)                       |



|                              |                                     |                                                                                                                                                                                                                                                                                                                                                                                                                                                                                                                                                                                                                                                                                                                                                                                                                                                                                                        |                      |         |         |      |      |  |             |      |      |  |          |     |     |       |                   |      |      |  |                         |     |     |  |                       |     |     |      |
|------------------------------|-------------------------------------|--------------------------------------------------------------------------------------------------------------------------------------------------------------------------------------------------------------------------------------------------------------------------------------------------------------------------------------------------------------------------------------------------------------------------------------------------------------------------------------------------------------------------------------------------------------------------------------------------------------------------------------------------------------------------------------------------------------------------------------------------------------------------------------------------------------------------------------------------------------------------------------------------------|----------------------|---------|---------|------|------|--|-------------|------|------|--|----------|-----|-----|-------|-------------------|------|------|--|-------------------------|-----|-----|--|-----------------------|-----|-----|------|
|                              |                                     | [95% CI 12.10, 12.61]                                                                                                                                                                                                                                                                                                                                                                                                                                                                                                                                                                                                                                                                                                                                                                                                                                                                                  | [95% CI 9.95, 14.22] |         |         |      |      |  |             |      |      |  |          |     |     |       |                   |      |      |  |                         |     |     |  |                       |     |     |      |
|                              |                                     | <p><b>Adjusted analysis:</b><br/>Wasting was not statistically associated with any developmental outcome variables after adjusting for vector of child, parent, caregiver and household-level characteristics.</p> <p><b>Overall findings:</b><br/>Wasting was not associated with a difference in behaviour after adjusting for confounding variables.</p>                                                                                                                                                                                                                                                                                                                                                                                                                                                                                                                                            |                      |         |         |      |      |  |             |      |      |  |          |     |     |       |                   |      |      |  |                         |     |     |  |                       |     |     |      |
| <b>Mwene-Batu et al 2020</b> | Rosenberg self-esteem scale, WHODAS | Controls n=407                                                                                                                                                                                                                                                                                                                                                                                                                                                                                                                                                                                                                                                                                                                                                                                                                                                                                         | Cases n=524          | p value |         |      |      |  |             |      |      |  |          |     |     |       |                   |      |      |  |                         |     |     |  |                       |     |     |      |
| (+)                          | (adulthood)                         | <p><b>Self-esteem:</b></p> <table border="0"> <tr> <td>Low (%)</td> <td>12.1</td> <td>20.5</td> <td></td> </tr> <tr> <td>Average (%)</td> <td>78.5</td> <td>72.6</td> <td></td> </tr> <tr> <td>High (%)</td> <td>9.4</td> <td>6.9</td> <td>0.003</td> </tr> </table> <p><b>Social related disability:</b></p> <table border="0"> <tr> <td>No disability (%)</td> <td>91.0</td> <td>94.2</td> <td></td> </tr> <tr> <td>Moderate disability (%)</td> <td>8.8</td> <td>5.0</td> <td></td> </tr> <tr> <td>Severe disability (%)</td> <td>0.3</td> <td>0.8</td> <td>0.03</td> </tr> </table> <p><b>Adjusted analysis:</b><br/>(unadjusted results)</p> <p><b>Overall findings:</b><br/>Cases had significantly less disability in terms of social relationships than the community controls but had statistically significant lower self-esteem than the controls unadjusted for confounding variables.</p> |                      |         | Low (%) | 12.1 | 20.5 |  | Average (%) | 78.5 | 72.6 |  | High (%) | 9.4 | 6.9 | 0.003 | No disability (%) | 91.0 | 94.2 |  | Moderate disability (%) | 8.8 | 5.0 |  | Severe disability (%) | 0.3 | 0.8 | 0.03 |
| Low (%)                      | 12.1                                | 20.5                                                                                                                                                                                                                                                                                                                                                                                                                                                                                                                                                                                                                                                                                                                                                                                                                                                                                                   |                      |         |         |      |      |  |             |      |      |  |          |     |     |       |                   |      |      |  |                         |     |     |  |                       |     |     |      |
| Average (%)                  | 78.5                                | 72.6                                                                                                                                                                                                                                                                                                                                                                                                                                                                                                                                                                                                                                                                                                                                                                                                                                                                                                   |                      |         |         |      |      |  |             |      |      |  |          |     |     |       |                   |      |      |  |                         |     |     |  |                       |     |     |      |
| High (%)                     | 9.4                                 | 6.9                                                                                                                                                                                                                                                                                                                                                                                                                                                                                                                                                                                                                                                                                                                                                                                                                                                                                                    | 0.003                |         |         |      |      |  |             |      |      |  |          |     |     |       |                   |      |      |  |                         |     |     |  |                       |     |     |      |
| No disability (%)            | 91.0                                | 94.2                                                                                                                                                                                                                                                                                                                                                                                                                                                                                                                                                                                                                                                                                                                                                                                                                                                                                                   |                      |         |         |      |      |  |             |      |      |  |          |     |     |       |                   |      |      |  |                         |     |     |  |                       |     |     |      |
| Moderate disability (%)      | 8.8                                 | 5.0                                                                                                                                                                                                                                                                                                                                                                                                                                                                                                                                                                                                                                                                                                                                                                                                                                                                                                    |                      |         |         |      |      |  |             |      |      |  |          |     |     |       |                   |      |      |  |                         |     |     |  |                       |     |     |      |
| Severe disability (%)        | 0.3                                 | 0.8                                                                                                                                                                                                                                                                                                                                                                                                                                                                                                                                                                                                                                                                                                                                                                                                                                                                                                    | 0.03                 |         |         |      |      |  |             |      |      |  |          |     |     |       |                   |      |      |  |                         |     |     |  |                       |     |     |      |
| <b>Abessa et al (2017)</b>   | ASQ: social-emotional score         | <p><b>ASQ: Socio-emotional score (incidence rate ratio in cases compared to controls):</b><br/>Socioemotional IRR 3.1 [95% CI 2.24, 4.26 ]</p> <p><b>Adjusted analysis:</b><br/>(results adjusted for significant variables from age, sex, maternal religion)</p> <p><b>Sample size:</b></p>                                                                                                                                                                                                                                                                                                                                                                                                                                                                                                                                                                                                           |                      |         |         |      |      |  |             |      |      |  |          |     |     |       |                   |      |      |  |                         |     |     |  |                       |     |     |      |
| (++)                         | (childhood)                         |                                                                                                                                                                                                                                                                                                                                                                                                                                                                                                                                                                                                                                                                                                                                                                                                                                                                                                        |                      |         |         |      |      |  |             |      |      |  |          |     |     |       |                   |      |      |  |                         |     |     |  |                       |     |     |      |

|                                    |                                                                                                              |                                                                                                                                                                                                                                                                                                                                                                                                                                                                                                                                                                                                                                                                                                                                                                                                                                                                                                                                                                                                     |                      |         |               |                 |                 |          |                           |                 |                 |          |                     |                 |                 |          |                     |                 |                 |          |                  |                 |                 |          |                  |                 |                 |          |
|------------------------------------|--------------------------------------------------------------------------------------------------------------|-----------------------------------------------------------------------------------------------------------------------------------------------------------------------------------------------------------------------------------------------------------------------------------------------------------------------------------------------------------------------------------------------------------------------------------------------------------------------------------------------------------------------------------------------------------------------------------------------------------------------------------------------------------------------------------------------------------------------------------------------------------------------------------------------------------------------------------------------------------------------------------------------------------------------------------------------------------------------------------------------------|----------------------|---------|---------------|-----------------|-----------------|----------|---------------------------|-----------------|-----------------|----------|---------------------|-----------------|-----------------|----------|---------------------|-----------------|-----------------|----------|------------------|-----------------|-----------------|----------|------------------|-----------------|-----------------|----------|
|                                    |                                                                                                              | Cases n=310, Controls n=310                                                                                                                                                                                                                                                                                                                                                                                                                                                                                                                                                                                                                                                                                                                                                                                                                                                                                                                                                                         |                      |         |               |                 |                 |          |                           |                 |                 |          |                     |                 |                 |          |                     |                 |                 |          |                  |                 |                 |          |                  |                 |                 |          |
|                                    |                                                                                                              | <p><b>Overall findings:</b><br/>Children with malnutrition performed worse on socio-emotional competences compared to age and sex-matched non-malnourished children adjusted for confounding variables.</p>                                                                                                                                                                                                                                                                                                                                                                                                                                                                                                                                                                                                                                                                                                                                                                                         |                      |         |               |                 |                 |          |                           |                 |                 |          |                     |                 |                 |          |                     |                 |                 |          |                  |                 |                 |          |                  |                 |                 |          |
| <b>De Grandis et al 2014</b>       | Paediatric quality of life inventory                                                                         | Controls n=28                                                                                                                                                                                                                                                                                                                                                                                                                                                                                                                                                                                                                                                                                                                                                                                                                                                                                                                                                                                       | Malnutrition n=25    | p value |               |                 |                 |          |                           |                 |                 |          |                     |                 |                 |          |                     |                 |                 |          |                  |                 |                 |          |                  |                 |                 |          |
| (-)                                | (childhood)                                                                                                  | <p><b>Peds Q:</b></p> <table border="0"> <tr> <td>Global score</td> <td>89.18 (SD 1.84)</td> <td>80.82 (SD 1.94)</td> <td>p&lt;0.0001</td> </tr> <tr> <td>Health/physical dimension</td> <td>94.75 (SD 1.87)</td> <td>87.75 (SD 3.37)</td> <td>p&lt;0.0001</td> </tr> <tr> <td>Psychosocial health</td> <td>86.57 (SD 1.42)</td> <td>77.77 (SD 2.90)</td> <td>p&lt;0.0001</td> </tr> <tr> <td>Emotional dimension</td> <td>78.75 (SD 2.96)</td> <td>67.80 (SD 4.40)</td> <td>p&lt;0.0001</td> </tr> <tr> <td>Social dimension</td> <td>95.71 (SD 1.52)</td> <td>88.80 (SD 3.05)</td> <td>p&lt;0.0001</td> </tr> <tr> <td>School dimension</td> <td>74.58 (SD 3.80)</td> <td>85.00 (SD 3.51)</td> <td>p&lt;0.0001</td> </tr> </table> <p><b>Adjusted analysis:</b><br/>(unadjusted analysis)</p> <p><b>Overall findings:</b><br/>Those with a history of early severe malnutrition, showed significantly lower quality of life scores compared to controls unadjusted for confounding variables.</p> |                      |         | Global score  | 89.18 (SD 1.84) | 80.82 (SD 1.94) | p<0.0001 | Health/physical dimension | 94.75 (SD 1.87) | 87.75 (SD 3.37) | p<0.0001 | Psychosocial health | 86.57 (SD 1.42) | 77.77 (SD 2.90) | p<0.0001 | Emotional dimension | 78.75 (SD 2.96) | 67.80 (SD 4.40) | p<0.0001 | Social dimension | 95.71 (SD 1.52) | 88.80 (SD 3.05) | p<0.0001 | School dimension | 74.58 (SD 3.80) | 85.00 (SD 3.51) | p<0.0001 |
| Global score                       | 89.18 (SD 1.84)                                                                                              | 80.82 (SD 1.94)                                                                                                                                                                                                                                                                                                                                                                                                                                                                                                                                                                                                                                                                                                                                                                                                                                                                                                                                                                                     | p<0.0001             |         |               |                 |                 |          |                           |                 |                 |          |                     |                 |                 |          |                     |                 |                 |          |                  |                 |                 |          |                  |                 |                 |          |
| Health/physical dimension          | 94.75 (SD 1.87)                                                                                              | 87.75 (SD 3.37)                                                                                                                                                                                                                                                                                                                                                                                                                                                                                                                                                                                                                                                                                                                                                                                                                                                                                                                                                                                     | p<0.0001             |         |               |                 |                 |          |                           |                 |                 |          |                     |                 |                 |          |                     |                 |                 |          |                  |                 |                 |          |                  |                 |                 |          |
| Psychosocial health                | 86.57 (SD 1.42)                                                                                              | 77.77 (SD 2.90)                                                                                                                                                                                                                                                                                                                                                                                                                                                                                                                                                                                                                                                                                                                                                                                                                                                                                                                                                                                     | p<0.0001             |         |               |                 |                 |          |                           |                 |                 |          |                     |                 |                 |          |                     |                 |                 |          |                  |                 |                 |          |                  |                 |                 |          |
| Emotional dimension                | 78.75 (SD 2.96)                                                                                              | 67.80 (SD 4.40)                                                                                                                                                                                                                                                                                                                                                                                                                                                                                                                                                                                                                                                                                                                                                                                                                                                                                                                                                                                     | p<0.0001             |         |               |                 |                 |          |                           |                 |                 |          |                     |                 |                 |          |                     |                 |                 |          |                  |                 |                 |          |                  |                 |                 |          |
| Social dimension                   | 95.71 (SD 1.52)                                                                                              | 88.80 (SD 3.05)                                                                                                                                                                                                                                                                                                                                                                                                                                                                                                                                                                                                                                                                                                                                                                                                                                                                                                                                                                                     | p<0.0001             |         |               |                 |                 |          |                           |                 |                 |          |                     |                 |                 |          |                     |                 |                 |          |                  |                 |                 |          |                  |                 |                 |          |
| School dimension                   | 74.58 (SD 3.80)                                                                                              | 85.00 (SD 3.51)                                                                                                                                                                                                                                                                                                                                                                                                                                                                                                                                                                                                                                                                                                                                                                                                                                                                                                                                                                                     | p<0.0001             |         |               |                 |                 |          |                           |                 |                 |          |                     |                 |                 |          |                     |                 |                 |          |                  |                 |                 |          |                  |                 |                 |          |
| <b>Baker-Henningham et al 2009</b> | Temperament Questionnaire derived from existing validated instruments (modified by Wachs, Purdue University) | Controls n=108                                                                                                                                                                                                                                                                                                                                                                                                                                                                                                                                                                                                                                                                                                                                                                                                                                                                                                                                                                                      | Undernourished n=212 | p value |               |                 |                 |          |                           |                 |                 |          |                     |                 |                 |          |                     |                 |                 |          |                  |                 |                 |          |                  |                 |                 |          |
| (++)                               | (childhood)                                                                                                  | <p><b>Temperament questionnaire:</b></p> <table border="0"> <tr> <td>Manageability</td> <td>8.67 (SD 3.51)</td> <td>9.56 (SD 3.26)</td> <td>p&lt;0.05</td> </tr> <tr> <td>Activity</td> <td>10.40 (SD 3.00)</td> <td>10.59 (SD 2.73)</td> <td>p&gt;0.05</td> </tr> <tr> <td>Emotionality</td> <td>13.66 (SD 4.74)</td> <td>14.80 (SD 4.24)</td> <td>p&lt;0.05</td> </tr> <tr> <td>Sociability</td> <td>8.15 (SD 3.87)</td> <td>9.29 (SD 3.98)</td> <td>p&lt;0.05</td> </tr> <tr> <td>Attention</td> <td>12.58 (SD 3.31)</td> <td>13.53 (SD 3.06)</td> <td>p&lt;0.05</td> </tr> <tr> <td>Soothability</td> <td>8.23 (SD 2.77)</td> <td>8.42 (SD 2.57)</td> <td>p&lt;0.01</td> </tr> </table> <p><b>Adjusted analysis:</b></p>                                                                                                                                                                                                                                                                        |                      |         | Manageability | 8.67 (SD 3.51)  | 9.56 (SD 3.26)  | p<0.05   | Activity                  | 10.40 (SD 3.00) | 10.59 (SD 2.73) | p>0.05   | Emotionality        | 13.66 (SD 4.74) | 14.80 (SD 4.24) | p<0.05   | Sociability         | 8.15 (SD 3.87)  | 9.29 (SD 3.98)  | p<0.05   | Attention        | 12.58 (SD 3.31) | 13.53 (SD 3.06) | p<0.05   | Soothability     | 8.23 (SD 2.77)  | 8.42 (SD 2.57)  | p<0.01   |
| Manageability                      | 8.67 (SD 3.51)                                                                                               | 9.56 (SD 3.26)                                                                                                                                                                                                                                                                                                                                                                                                                                                                                                                                                                                                                                                                                                                                                                                                                                                                                                                                                                                      | p<0.05               |         |               |                 |                 |          |                           |                 |                 |          |                     |                 |                 |          |                     |                 |                 |          |                  |                 |                 |          |                  |                 |                 |          |
| Activity                           | 10.40 (SD 3.00)                                                                                              | 10.59 (SD 2.73)                                                                                                                                                                                                                                                                                                                                                                                                                                                                                                                                                                                                                                                                                                                                                                                                                                                                                                                                                                                     | p>0.05               |         |               |                 |                 |          |                           |                 |                 |          |                     |                 |                 |          |                     |                 |                 |          |                  |                 |                 |          |                  |                 |                 |          |
| Emotionality                       | 13.66 (SD 4.74)                                                                                              | 14.80 (SD 4.24)                                                                                                                                                                                                                                                                                                                                                                                                                                                                                                                                                                                                                                                                                                                                                                                                                                                                                                                                                                                     | p<0.05               |         |               |                 |                 |          |                           |                 |                 |          |                     |                 |                 |          |                     |                 |                 |          |                  |                 |                 |          |                  |                 |                 |          |
| Sociability                        | 8.15 (SD 3.87)                                                                                               | 9.29 (SD 3.98)                                                                                                                                                                                                                                                                                                                                                                                                                                                                                                                                                                                                                                                                                                                                                                                                                                                                                                                                                                                      | p<0.05               |         |               |                 |                 |          |                           |                 |                 |          |                     |                 |                 |          |                     |                 |                 |          |                  |                 |                 |          |                  |                 |                 |          |
| Attention                          | 12.58 (SD 3.31)                                                                                              | 13.53 (SD 3.06)                                                                                                                                                                                                                                                                                                                                                                                                                                                                                                                                                                                                                                                                                                                                                                                                                                                                                                                                                                                     | p<0.05               |         |               |                 |                 |          |                           |                 |                 |          |                     |                 |                 |          |                     |                 |                 |          |                  |                 |                 |          |                  |                 |                 |          |
| Soothability                       | 8.23 (SD 2.77)                                                                                               | 8.42 (SD 2.57)                                                                                                                                                                                                                                                                                                                                                                                                                                                                                                                                                                                                                                                                                                                                                                                                                                                                                                                                                                                      | p<0.01               |         |               |                 |                 |          |                           |                 |                 |          |                     |                 |                 |          |                     |                 |                 |          |                  |                 |                 |          |                  |                 |                 |          |

|                                |                                                                                                                                                           |                                                                                                                                                                                                                                                                                                                                                                                                                                                                                                                                                                                                                                                                                                                                                                                                                                                                                                                                                                                                                                                                                                                                                     |
|--------------------------------|-----------------------------------------------------------------------------------------------------------------------------------------------------------|-----------------------------------------------------------------------------------------------------------------------------------------------------------------------------------------------------------------------------------------------------------------------------------------------------------------------------------------------------------------------------------------------------------------------------------------------------------------------------------------------------------------------------------------------------------------------------------------------------------------------------------------------------------------------------------------------------------------------------------------------------------------------------------------------------------------------------------------------------------------------------------------------------------------------------------------------------------------------------------------------------------------------------------------------------------------------------------------------------------------------------------------------------|
|                                |                                                                                                                                                           | <p>After adjusting for significant covariates (parental schooling and occupation, sanitation index, asset index, housing index, mother's BMI and home), the undernourished children were less sociable (regression coefficient (B) = -0.96 [95% CI -0.04, -1.88]), less attentive (B = -0.94 [95% CI -0.19, -1.69]), more fearful (B = 1.43 [95% CI 2.44, 0.42]), and had more negative emotionality (B = -1.08 [95% CI -2.16, 0.006]).</p> <p><b>Overall findings:</b><br/>There were significant differences in temperament traits between undernourished and better-nourished groups after adjusting for confounding variables.</p>                                                                                                                                                                                                                                                                                                                                                                                                                                                                                                              |
| <p><b>Liu et al (2004)</b></p> | <p>Child behaviour questionnaire at age 8, Child Behaviour Checklist at age 11, Revised Behaviour Checklist at Age 17</p> <p>(childhood, adolescence)</p> | <p><b>Externalizing behaviour problems at age 8:</b><br/>Malnourished children had higher overall externalizing behaviour scores (both hyperactivity and aggression) than controls.</p> <p><b>Adjusted analysis:</b><br/>Main effect of malnutrition remained significant after controlling for psychosocial adversity but was abolished after controlling for cognitive ability.</p> <p><b>Externalizing behaviour problems at age 11:</b><br/>Malnourished children had higher externalising behaviour scores (hyperactivity only) at age 11 than non-malnourished children.</p> <p><b>Adjusted analysis:</b><br/>Main effect of malnutrition remained significant after controlling for psychosocial adversity but was abolished after controlling for cognitive ability.</p> <p><b>Externalizing behaviour problems at age 17:</b><br/>Malnourished group had significantly higher scores on conduct disorder and motor excess but not attention problems or socialized aggression.</p> <p><b>Adjusted analysis:</b><br/>Main effect of malnutrition remained significant after adjusting for psychosocial adversity and cognitive ability.</p> |

|                                             |                                                      |                                                                                                                                                                                                                                                                                                                                                                                                                                                                                                                                                                                                                                                                                                                                                                                                                                                                                                                                                                                                                                                                                                                                                                                                                                                                 |
|---------------------------------------------|------------------------------------------------------|-----------------------------------------------------------------------------------------------------------------------------------------------------------------------------------------------------------------------------------------------------------------------------------------------------------------------------------------------------------------------------------------------------------------------------------------------------------------------------------------------------------------------------------------------------------------------------------------------------------------------------------------------------------------------------------------------------------------------------------------------------------------------------------------------------------------------------------------------------------------------------------------------------------------------------------------------------------------------------------------------------------------------------------------------------------------------------------------------------------------------------------------------------------------------------------------------------------------------------------------------------------------|
|                                             |                                                      | <p><b>Sample size:</b><br/>Malnutrition group n=235, Control group n=807</p> <p><b>Overall Findings:</b><br/>Children with malnutrition were more aggressive or hyperactive at age 8 years, had more externalizing problems at age 11, and had greater conduct disorder and excessive motor activity at age 17 after adjusting for confounding variables.</p>                                                                                                                                                                                                                                                                                                                                                                                                                                                                                                                                                                                                                                                                                                                                                                                                                                                                                                   |
| Barbados Nutrition Study                    |                                                      |                                                                                                                                                                                                                                                                                                                                                                                                                                                                                                                                                                                                                                                                                                                                                                                                                                                                                                                                                                                                                                                                                                                                                                                                                                                                 |
| <p><b>Hock et al 2018*</b><br/><br/>(+)</p> | <p>SCID-II-PQ, NEO PI-R FFM<br/><br/>(adulthood)</p> | <p><b>SCID-II-PQ (linear regression with malnutrition as predictor of score):</b><br/>Paranoid personality score 0.6 [95% CI 0.0, 1.2] (p=0.0499)</p> <p><b>Adjusted analysis:</b><br/>PD paranoid scale score had unique association with malnutrition after adjusting for maltreatment and childhood standard of living</p> <p><b>NEO PI-R FFM (linear regression with malnutrition as predictor of score):</b><br/>Avoidant personality score 1.0 [95% CI 0.2, 1.7] (p=0.009), schizoid personality score 0.7 [95% CI 0.1, 1.4] (p=0.03) and dependant personality score 0.7 [95% CI 0.1, 1.4] (p=0.04)</p> <p><b>Adjusted analysis:</b><br/>PD avoidant, schizoid and dependant scale scores had unique associations with malnutrition after adjusting for maltreatment and childhood standard of living</p> <p><b>Sample size:</b><br/>Malnutrition group n=77, control group n=62</p> <p><b>Overall findings:</b><br/>Adults with history of infant malnutrition showed an increase in most SCID-II and NEO FFM PD personality scores compared to those with little or no exposure to either adversity. Few personality disorder score differences were statistically significant however and results differed depending on the assessment tool used.</p> |

| <p><b>Waber (2) et al 2014*</b></p> <p>(++)</p>                                                                                                                                                                                                                               | <p>Behavioural Regulation Index score</p> <p>(adulthood)</p> | <table border="1"> <thead> <tr> <th></th> <th>Controls n=59</th> <th>Malnutrition n=77</th> </tr> </thead> <tbody> <tr> <td colspan="3"><b>Behavioural regulation index:</b></td> </tr> <tr> <td>Mean score</td> <td>43.34 (SD 7.52)</td> <td>49.51 (SD 11.21)</td> </tr> <tr> <td colspan="3">Mean difference (adjusted)<br/>3.40 (p&lt;0.05)</td> </tr> <tr> <td colspan="3"><b>Adjusted analysis</b><br/>(results adjusted for childhood standard of living and IQ)</td> </tr> <tr> <td colspan="3"><b>Overall findings:</b><br/>Adults with a history of infant malnutrition showed a significantly higher behavioural regulation index score which is indicative of more behavioural problems, with a significant difference in score after adjusting for confounding variables.</td> </tr> </tbody> </table>                                                                                                                        |  | Controls n=59 | Malnutrition n=77 | <b>Behavioural regulation index:</b> |  |  | Mean score | 43.34 (SD 7.52) | 49.51 (SD 11.21) | Mean difference (adjusted)<br>3.40 (p<0.05) |  |  | <b>Adjusted analysis</b><br>(results adjusted for childhood standard of living and IQ) |  |  | <b>Overall findings:</b><br>Adults with a history of infant malnutrition showed a significantly higher behavioural regulation index score which is indicative of more behavioural problems, with a significant difference in score after adjusting for confounding variables. |  |  |
|-------------------------------------------------------------------------------------------------------------------------------------------------------------------------------------------------------------------------------------------------------------------------------|--------------------------------------------------------------|-------------------------------------------------------------------------------------------------------------------------------------------------------------------------------------------------------------------------------------------------------------------------------------------------------------------------------------------------------------------------------------------------------------------------------------------------------------------------------------------------------------------------------------------------------------------------------------------------------------------------------------------------------------------------------------------------------------------------------------------------------------------------------------------------------------------------------------------------------------------------------------------------------------------------------------------|--|---------------|-------------------|--------------------------------------|--|--|------------|-----------------|------------------|---------------------------------------------|--|--|----------------------------------------------------------------------------------------|--|--|-------------------------------------------------------------------------------------------------------------------------------------------------------------------------------------------------------------------------------------------------------------------------------|--|--|
|                                                                                                                                                                                                                                                                               | Controls n=59                                                | Malnutrition n=77                                                                                                                                                                                                                                                                                                                                                                                                                                                                                                                                                                                                                                                                                                                                                                                                                                                                                                                         |  |               |                   |                                      |  |  |            |                 |                  |                                             |  |  |                                                                                        |  |  |                                                                                                                                                                                                                                                                               |  |  |
| <b>Behavioural regulation index:</b>                                                                                                                                                                                                                                          |                                                              |                                                                                                                                                                                                                                                                                                                                                                                                                                                                                                                                                                                                                                                                                                                                                                                                                                                                                                                                           |  |               |                   |                                      |  |  |            |                 |                  |                                             |  |  |                                                                                        |  |  |                                                                                                                                                                                                                                                                               |  |  |
| Mean score                                                                                                                                                                                                                                                                    | 43.34 (SD 7.52)                                              | 49.51 (SD 11.21)                                                                                                                                                                                                                                                                                                                                                                                                                                                                                                                                                                                                                                                                                                                                                                                                                                                                                                                          |  |               |                   |                                      |  |  |            |                 |                  |                                             |  |  |                                                                                        |  |  |                                                                                                                                                                                                                                                                               |  |  |
| Mean difference (adjusted)<br>3.40 (p<0.05)                                                                                                                                                                                                                                   |                                                              |                                                                                                                                                                                                                                                                                                                                                                                                                                                                                                                                                                                                                                                                                                                                                                                                                                                                                                                                           |  |               |                   |                                      |  |  |            |                 |                  |                                             |  |  |                                                                                        |  |  |                                                                                                                                                                                                                                                                               |  |  |
| <b>Adjusted analysis</b><br>(results adjusted for childhood standard of living and IQ)                                                                                                                                                                                        |                                                              |                                                                                                                                                                                                                                                                                                                                                                                                                                                                                                                                                                                                                                                                                                                                                                                                                                                                                                                                           |  |               |                   |                                      |  |  |            |                 |                  |                                             |  |  |                                                                                        |  |  |                                                                                                                                                                                                                                                                               |  |  |
| <b>Overall findings:</b><br>Adults with a history of infant malnutrition showed a significantly higher behavioural regulation index score which is indicative of more behavioural problems, with a significant difference in score after adjusting for confounding variables. |                                                              |                                                                                                                                                                                                                                                                                                                                                                                                                                                                                                                                                                                                                                                                                                                                                                                                                                                                                                                                           |  |               |                   |                                      |  |  |            |                 |                  |                                             |  |  |                                                                                        |  |  |                                                                                                                                                                                                                                                                               |  |  |
| <p><b>Galler et al 2013*</b></p> <p>(+)</p>                                                                                                                                                                                                                                   | <p>NEO-PI-R personality inventory</p> <p>(adulthood)</p>     | <p><b>NEO-PI-R score:</b><br/>At the broad domain or factor level, previously malnourished participants had higher scores on Neuroticism and lower scores on Extraversion, Openness, Agreeableness and Conscientiousness than healthy controls. At the sub-domain or facet level, previously malnourished participants reported more anxiety, vulnerability, shyness and lowered sociability, less intellectual curiosity, greater suspiciousness of others, a more egocentric than altruistic orientation, and a lowered sense of efficacy or competence.</p> <p><b>Adjusted analysis:</b><br/>(results adjusted for childhood standard of living)</p> <p><b>Sample size</b><br/>Malnutrition group n=77, Control group n=57</p> <p><b>Overall findings:</b><br/>Childhood malnutrition was associated with higher chance of personality trait scores outside of the average range after adjusting for childhood standard of living.</p> |  |               |                   |                                      |  |  |            |                 |                  |                                             |  |  |                                                                                        |  |  |                                                                                                                                                                                                                                                                               |  |  |

| <b>Galler (1) et al 2012*</b><br><br>(+)                                                                                                            | CAARS, CPT<br><br>(adulthood)                                                                                    | <table border="1"> <thead> <tr> <th></th> <th>Controls n=63</th> <th>Malnutrition n=80</th> <th>p value</th> </tr> </thead> <tbody> <tr> <td colspan="4"><b>CAARS (mean score):</b></td> </tr> <tr> <td>Inattentive symptoms</td> <td>3.6 (SD 0.1)</td> <td>3.7 (SD 0.2)</td> <td>&lt;0.05</td> </tr> <tr> <td>Hyperactive symptoms</td> <td>3.7 (SD 0.1)</td> <td>3.7 (SD 0.2)</td> <td>&gt;0.05</td> </tr> <tr> <td>DSM-IV ADHD symptoms</td> <td>3.6 (SD 0.1)</td> <td>3.7 (SD 0.1)</td> <td>&lt;0.01</td> </tr> <tr> <td>ADHD index</td> <td>3.8 (SD 0.2)</td> <td>3.7 (SD 0.1)</td> <td>&gt;0.05</td> </tr> <tr> <td colspan="4"><hr/></td> </tr> <tr> <th></th> <th>Controls n=59</th> <th>Malnutrition n=77</th> <th>p value</th> </tr> <tr> <td colspan="4"><b>CPT (mean score):</b></td> </tr> <tr> <td>Commission errors</td> <td>3.8 (SD 0.2)</td> <td>3.9 (SD 0.2)</td> <td>&gt;0.05</td> </tr> <tr> <td>Omission errors</td> <td>3.9 (SD 0.2)</td> <td>4.1 (SD 0.3)</td> <td>&gt;0.05</td> </tr> <tr> <td>Reaction time</td> <td>4.0 (SD 0.2)</td> <td>4.0 (SD 0.2)</td> <td>&gt;0.05</td> </tr> </tbody> </table> <p><b>Adjusted analysis:</b><br/>(results adjusted for childhood standard of living and IQ)</p> <p><b>Overall findings:</b><br/>CAARS scores were higher (indicating more attention problems) in the previously malnourished group. There were significant differences in inattention and DSM-IV ADHD symptom scores after adjusting for confounding variables. Differences in CPT scores were attenuated after adjusting for confounding variables.</p> |                   | Controls n=63 | Malnutrition n=80 | p value | <b>CAARS (mean score):</b>                          |  |  |  | Inattentive symptoms | 3.6 (SD 0.1)    | 3.7 (SD 0.2)   | <0.05 | Hyperactive symptoms                    | 3.7 (SD 0.1) | 3.7 (SD 0.2) | >0.05 | DSM-IV ADHD symptoms                                                                                                                                | 3.6 (SD 0.1) | 3.7 (SD 0.1) | <0.01 | ADHD index                                                                                                                           | 3.8 (SD 0.2) | 3.7 (SD 0.1) | >0.05 | <hr/> |  |  |  |  | Controls n=59 | Malnutrition n=77 | p value | <b>CPT (mean score):</b> |  |  |  | Commission errors | 3.8 (SD 0.2) | 3.9 (SD 0.2) | >0.05 | Omission errors | 3.9 (SD 0.2) | 4.1 (SD 0.3) | >0.05 | Reaction time | 4.0 (SD 0.2) | 4.0 (SD 0.2) | >0.05 |
|-----------------------------------------------------------------------------------------------------------------------------------------------------|------------------------------------------------------------------------------------------------------------------|------------------------------------------------------------------------------------------------------------------------------------------------------------------------------------------------------------------------------------------------------------------------------------------------------------------------------------------------------------------------------------------------------------------------------------------------------------------------------------------------------------------------------------------------------------------------------------------------------------------------------------------------------------------------------------------------------------------------------------------------------------------------------------------------------------------------------------------------------------------------------------------------------------------------------------------------------------------------------------------------------------------------------------------------------------------------------------------------------------------------------------------------------------------------------------------------------------------------------------------------------------------------------------------------------------------------------------------------------------------------------------------------------------------------------------------------------------------------------------------------------------------------------------------------------------------------------------------|-------------------|---------------|-------------------|---------|-----------------------------------------------------|--|--|--|----------------------|-----------------|----------------|-------|-----------------------------------------|--------------|--------------|-------|-----------------------------------------------------------------------------------------------------------------------------------------------------|--------------|--------------|-------|--------------------------------------------------------------------------------------------------------------------------------------|--------------|--------------|-------|-------|--|--|--|--|---------------|-------------------|---------|--------------------------|--|--|--|-------------------|--------------|--------------|-------|-----------------|--------------|--------------|-------|---------------|--------------|--------------|-------|
|                                                                                                                                                     |                                                                                                                  | Controls n=63                                                                                                                                                                                                                                                                                                                                                                                                                                                                                                                                                                                                                                                                                                                                                                                                                                                                                                                                                                                                                                                                                                                                                                                                                                                                                                                                                                                                                                                                                                                                                                            | Malnutrition n=80 | p value       |                   |         |                                                     |  |  |  |                      |                 |                |       |                                         |              |              |       |                                                                                                                                                     |              |              |       |                                                                                                                                      |              |              |       |       |  |  |  |  |               |                   |         |                          |  |  |  |                   |              |              |       |                 |              |              |       |               |              |              |       |
| <b>CAARS (mean score):</b>                                                                                                                          |                                                                                                                  |                                                                                                                                                                                                                                                                                                                                                                                                                                                                                                                                                                                                                                                                                                                                                                                                                                                                                                                                                                                                                                                                                                                                                                                                                                                                                                                                                                                                                                                                                                                                                                                          |                   |               |                   |         |                                                     |  |  |  |                      |                 |                |       |                                         |              |              |       |                                                                                                                                                     |              |              |       |                                                                                                                                      |              |              |       |       |  |  |  |  |               |                   |         |                          |  |  |  |                   |              |              |       |                 |              |              |       |               |              |              |       |
| Inattentive symptoms                                                                                                                                | 3.6 (SD 0.1)                                                                                                     | 3.7 (SD 0.2)                                                                                                                                                                                                                                                                                                                                                                                                                                                                                                                                                                                                                                                                                                                                                                                                                                                                                                                                                                                                                                                                                                                                                                                                                                                                                                                                                                                                                                                                                                                                                                             | <0.05             |               |                   |         |                                                     |  |  |  |                      |                 |                |       |                                         |              |              |       |                                                                                                                                                     |              |              |       |                                                                                                                                      |              |              |       |       |  |  |  |  |               |                   |         |                          |  |  |  |                   |              |              |       |                 |              |              |       |               |              |              |       |
| Hyperactive symptoms                                                                                                                                | 3.7 (SD 0.1)                                                                                                     | 3.7 (SD 0.2)                                                                                                                                                                                                                                                                                                                                                                                                                                                                                                                                                                                                                                                                                                                                                                                                                                                                                                                                                                                                                                                                                                                                                                                                                                                                                                                                                                                                                                                                                                                                                                             | >0.05             |               |                   |         |                                                     |  |  |  |                      |                 |                |       |                                         |              |              |       |                                                                                                                                                     |              |              |       |                                                                                                                                      |              |              |       |       |  |  |  |  |               |                   |         |                          |  |  |  |                   |              |              |       |                 |              |              |       |               |              |              |       |
| DSM-IV ADHD symptoms                                                                                                                                | 3.6 (SD 0.1)                                                                                                     | 3.7 (SD 0.1)                                                                                                                                                                                                                                                                                                                                                                                                                                                                                                                                                                                                                                                                                                                                                                                                                                                                                                                                                                                                                                                                                                                                                                                                                                                                                                                                                                                                                                                                                                                                                                             | <0.01             |               |                   |         |                                                     |  |  |  |                      |                 |                |       |                                         |              |              |       |                                                                                                                                                     |              |              |       |                                                                                                                                      |              |              |       |       |  |  |  |  |               |                   |         |                          |  |  |  |                   |              |              |       |                 |              |              |       |               |              |              |       |
| ADHD index                                                                                                                                          | 3.8 (SD 0.2)                                                                                                     | 3.7 (SD 0.1)                                                                                                                                                                                                                                                                                                                                                                                                                                                                                                                                                                                                                                                                                                                                                                                                                                                                                                                                                                                                                                                                                                                                                                                                                                                                                                                                                                                                                                                                                                                                                                             | >0.05             |               |                   |         |                                                     |  |  |  |                      |                 |                |       |                                         |              |              |       |                                                                                                                                                     |              |              |       |                                                                                                                                      |              |              |       |       |  |  |  |  |               |                   |         |                          |  |  |  |                   |              |              |       |                 |              |              |       |               |              |              |       |
| <hr/>                                                                                                                                               |                                                                                                                  |                                                                                                                                                                                                                                                                                                                                                                                                                                                                                                                                                                                                                                                                                                                                                                                                                                                                                                                                                                                                                                                                                                                                                                                                                                                                                                                                                                                                                                                                                                                                                                                          |                   |               |                   |         |                                                     |  |  |  |                      |                 |                |       |                                         |              |              |       |                                                                                                                                                     |              |              |       |                                                                                                                                      |              |              |       |       |  |  |  |  |               |                   |         |                          |  |  |  |                   |              |              |       |                 |              |              |       |               |              |              |       |
|                                                                                                                                                     | Controls n=59                                                                                                    | Malnutrition n=77                                                                                                                                                                                                                                                                                                                                                                                                                                                                                                                                                                                                                                                                                                                                                                                                                                                                                                                                                                                                                                                                                                                                                                                                                                                                                                                                                                                                                                                                                                                                                                        | p value           |               |                   |         |                                                     |  |  |  |                      |                 |                |       |                                         |              |              |       |                                                                                                                                                     |              |              |       |                                                                                                                                      |              |              |       |       |  |  |  |  |               |                   |         |                          |  |  |  |                   |              |              |       |                 |              |              |       |               |              |              |       |
| <b>CPT (mean score):</b>                                                                                                                            |                                                                                                                  |                                                                                                                                                                                                                                                                                                                                                                                                                                                                                                                                                                                                                                                                                                                                                                                                                                                                                                                                                                                                                                                                                                                                                                                                                                                                                                                                                                                                                                                                                                                                                                                          |                   |               |                   |         |                                                     |  |  |  |                      |                 |                |       |                                         |              |              |       |                                                                                                                                                     |              |              |       |                                                                                                                                      |              |              |       |       |  |  |  |  |               |                   |         |                          |  |  |  |                   |              |              |       |                 |              |              |       |               |              |              |       |
| Commission errors                                                                                                                                   | 3.8 (SD 0.2)                                                                                                     | 3.9 (SD 0.2)                                                                                                                                                                                                                                                                                                                                                                                                                                                                                                                                                                                                                                                                                                                                                                                                                                                                                                                                                                                                                                                                                                                                                                                                                                                                                                                                                                                                                                                                                                                                                                             | >0.05             |               |                   |         |                                                     |  |  |  |                      |                 |                |       |                                         |              |              |       |                                                                                                                                                     |              |              |       |                                                                                                                                      |              |              |       |       |  |  |  |  |               |                   |         |                          |  |  |  |                   |              |              |       |                 |              |              |       |               |              |              |       |
| Omission errors                                                                                                                                     | 3.9 (SD 0.2)                                                                                                     | 4.1 (SD 0.3)                                                                                                                                                                                                                                                                                                                                                                                                                                                                                                                                                                                                                                                                                                                                                                                                                                                                                                                                                                                                                                                                                                                                                                                                                                                                                                                                                                                                                                                                                                                                                                             | >0.05             |               |                   |         |                                                     |  |  |  |                      |                 |                |       |                                         |              |              |       |                                                                                                                                                     |              |              |       |                                                                                                                                      |              |              |       |       |  |  |  |  |               |                   |         |                          |  |  |  |                   |              |              |       |                 |              |              |       |               |              |              |       |
| Reaction time                                                                                                                                       | 4.0 (SD 0.2)                                                                                                     | 4.0 (SD 0.2)                                                                                                                                                                                                                                                                                                                                                                                                                                                                                                                                                                                                                                                                                                                                                                                                                                                                                                                                                                                                                                                                                                                                                                                                                                                                                                                                                                                                                                                                                                                                                                             | >0.05             |               |                   |         |                                                     |  |  |  |                      |                 |                |       |                                         |              |              |       |                                                                                                                                                     |              |              |       |                                                                                                                                      |              |              |       |       |  |  |  |  |               |                   |         |                          |  |  |  |                   |              |              |       |                 |              |              |       |               |              |              |       |
| <b>Galler (2) et al 2012*</b><br><br>(+)                                                                                                            | Conduct-problems:<br>Child-Behaviour-<br>Questionnaire, Teacher-<br>Behaviour-Questionnaire<br><br>(adolescence) | <table border="1"> <thead> <tr> <th></th> <th>Controls n=60</th> <th>Malnutrition n=56</th> <th>p value</th> </tr> </thead> <tbody> <tr> <td colspan="4"><b>Child-Behaviour-Questionnaire (coefficient):</b></td> </tr> <tr> <td>Conduct problems</td> <td>-0.27 (SD 0.84)</td> <td>0.29 (SD 1.18)</td> <td>&lt;0.01</td> </tr> <tr> <td colspan="4"><b>Teacher-behaviour-questionnaire:</b></td> </tr> <tr> <td colspan="4">All four items showed a higher level prevalence of aberrant behavior in the previously malnourished children as compared with the comparison group.</td> </tr> <tr> <td colspan="4"><b>Adjusted analysis:</b><br/>The difference was no-longer-significant with IQ and childhood standard of living included in the model</td> </tr> </tbody> </table>                                                                                                                                                                                                                                                                                                                                                                                                                                                                                                                                                                                                                                                                                                                                                                                                      |                   | Controls n=60 | Malnutrition n=56 | p value | <b>Child-Behaviour-Questionnaire (coefficient):</b> |  |  |  | Conduct problems     | -0.27 (SD 0.84) | 0.29 (SD 1.18) | <0.01 | <b>Teacher-behaviour-questionnaire:</b> |              |              |       | All four items showed a higher level prevalence of aberrant behavior in the previously malnourished children as compared with the comparison group. |              |              |       | <b>Adjusted analysis:</b><br>The difference was no-longer-significant with IQ and childhood standard of living included in the model |              |              |       |       |  |  |  |  |               |                   |         |                          |  |  |  |                   |              |              |       |                 |              |              |       |               |              |              |       |
|                                                                                                                                                     | Controls n=60                                                                                                    | Malnutrition n=56                                                                                                                                                                                                                                                                                                                                                                                                                                                                                                                                                                                                                                                                                                                                                                                                                                                                                                                                                                                                                                                                                                                                                                                                                                                                                                                                                                                                                                                                                                                                                                        | p value           |               |                   |         |                                                     |  |  |  |                      |                 |                |       |                                         |              |              |       |                                                                                                                                                     |              |              |       |                                                                                                                                      |              |              |       |       |  |  |  |  |               |                   |         |                          |  |  |  |                   |              |              |       |                 |              |              |       |               |              |              |       |
| <b>Child-Behaviour-Questionnaire (coefficient):</b>                                                                                                 |                                                                                                                  |                                                                                                                                                                                                                                                                                                                                                                                                                                                                                                                                                                                                                                                                                                                                                                                                                                                                                                                                                                                                                                                                                                                                                                                                                                                                                                                                                                                                                                                                                                                                                                                          |                   |               |                   |         |                                                     |  |  |  |                      |                 |                |       |                                         |              |              |       |                                                                                                                                                     |              |              |       |                                                                                                                                      |              |              |       |       |  |  |  |  |               |                   |         |                          |  |  |  |                   |              |              |       |                 |              |              |       |               |              |              |       |
| Conduct problems                                                                                                                                    | -0.27 (SD 0.84)                                                                                                  | 0.29 (SD 1.18)                                                                                                                                                                                                                                                                                                                                                                                                                                                                                                                                                                                                                                                                                                                                                                                                                                                                                                                                                                                                                                                                                                                                                                                                                                                                                                                                                                                                                                                                                                                                                                           | <0.01             |               |                   |         |                                                     |  |  |  |                      |                 |                |       |                                         |              |              |       |                                                                                                                                                     |              |              |       |                                                                                                                                      |              |              |       |       |  |  |  |  |               |                   |         |                          |  |  |  |                   |              |              |       |                 |              |              |       |               |              |              |       |
| <b>Teacher-behaviour-questionnaire:</b>                                                                                                             |                                                                                                                  |                                                                                                                                                                                                                                                                                                                                                                                                                                                                                                                                                                                                                                                                                                                                                                                                                                                                                                                                                                                                                                                                                                                                                                                                                                                                                                                                                                                                                                                                                                                                                                                          |                   |               |                   |         |                                                     |  |  |  |                      |                 |                |       |                                         |              |              |       |                                                                                                                                                     |              |              |       |                                                                                                                                      |              |              |       |       |  |  |  |  |               |                   |         |                          |  |  |  |                   |              |              |       |                 |              |              |       |               |              |              |       |
| All four items showed a higher level prevalence of aberrant behavior in the previously malnourished children as compared with the comparison group. |                                                                                                                  |                                                                                                                                                                                                                                                                                                                                                                                                                                                                                                                                                                                                                                                                                                                                                                                                                                                                                                                                                                                                                                                                                                                                                                                                                                                                                                                                                                                                                                                                                                                                                                                          |                   |               |                   |         |                                                     |  |  |  |                      |                 |                |       |                                         |              |              |       |                                                                                                                                                     |              |              |       |                                                                                                                                      |              |              |       |       |  |  |  |  |               |                   |         |                          |  |  |  |                   |              |              |       |                 |              |              |       |               |              |              |       |
| <b>Adjusted analysis:</b><br>The difference was no-longer-significant with IQ and childhood standard of living included in the model                |                                                                                                                  |                                                                                                                                                                                                                                                                                                                                                                                                                                                                                                                                                                                                                                                                                                                                                                                                                                                                                                                                                                                                                                                                                                                                                                                                                                                                                                                                                                                                                                                                                                                                                                                          |                   |               |                   |         |                                                     |  |  |  |                      |                 |                |       |                                         |              |              |       |                                                                                                                                                     |              |              |       |                                                                                                                                      |              |              |       |       |  |  |  |  |               |                   |         |                          |  |  |  |                   |              |              |       |                 |              |              |       |               |              |              |       |

|                                                |                                                                                                                                           |                                                                                                                                                                                                                                                                                                                                                                                                                                                                                                                                                                                                                                                                                                                                                                                                                                                                                                                                                                                                          |  |  |
|------------------------------------------------|-------------------------------------------------------------------------------------------------------------------------------------------|----------------------------------------------------------------------------------------------------------------------------------------------------------------------------------------------------------------------------------------------------------------------------------------------------------------------------------------------------------------------------------------------------------------------------------------------------------------------------------------------------------------------------------------------------------------------------------------------------------------------------------------------------------------------------------------------------------------------------------------------------------------------------------------------------------------------------------------------------------------------------------------------------------------------------------------------------------------------------------------------------------|--|--|
|                                                |                                                                                                                                           | <p><b>Overall findings:</b><br/>Self-reported conduct problems were more prevalent among previously malnourished youth. The associated was no longer significant when adjusted for confounding variables.</p>                                                                                                                                                                                                                                                                                                                                                                                                                                                                                                                                                                                                                                                                                                                                                                                            |  |  |
| <p><b>Waber et al 2011*</b><br/><br/>(+)</p>   | <p>Teacher-Behaviour Questionnaire, School functioning scale<br/>Minnesota-General-Adjustment-and Morale-Scale<br/><br/>(adolescence)</p> | <p>Controls n=60                      Malnutrition n=56                      p value</p>                                                                                                                                                                                                                                                                                                                                                                                                                                                                                                                                                                                                                                                                                                                                                                                                                                                                                                                 |  |  |
|                                                |                                                                                                                                           | <p><b>Teacher questionnaire:</b><br/>Attention symptoms                      -0.36 (SD 0.81)                      0.33 (SD 0.96)                      &lt;0.0001</p> <p><b>Morale scale:</b><br/>Depressive symptoms                      -0.33 (SD 0.93)                      0.30 (SD 1.01)                      0.001</p> <p><b>Adjusted analysis:</b><br/>Association attenuated when IQ and attention problems included in model. Difference in attention symptoms not significant when adjusting childhood standard of living.</p> <p><b>Overall findings:</b><br/>Depressive symptoms and inattention were higher in those with malnutrition but there were no significant differences when adjusting for confounding variables.</p>                                                                                                                                                                                                                                                              |  |  |
| <p><b>Galler et al 2011*</b><br/><br/>(++)</p> | <p>Barbados-Child-Behaviour-Scale<br/><br/>adolescence</p>                                                                                | <p>Controls n=109                      Malnutrition n=107</p>                                                                                                                                                                                                                                                                                                                                                                                                                                                                                                                                                                                                                                                                                                                                                                                                                                                                                                                                            |  |  |
|                                                |                                                                                                                                           | <p>(correlations with mean score)</p> <p><b>Peer aggression:</b><br/>Time point 1 (9-15y)                      -0.05 (SD 0.96)                      0.39 (SD 1.16)<br/>Time point 2 (11-17y)                      -0.34 (SD 0.79)                      -0.34 (SD 0.80)</p> <p><b>Cooperative with adults:</b><br/>Time point 1 (9-15y)                      0.19 (SD 1.11)                      -0.01 (SD 1.15)<br/>Time point 2 (11-17y)                      0.15 (SD 0.73)                      -0.28 (SD 1.00)</p> <p><b>Activity level:</b><br/>Time point 1 (9-15y)                      0.32 (SD 1.09)                      0.18 (SD 1.03)<br/>Time point 2 (11-17y)                      -0.35 (SD 0.72)                      -0.29 (SD 0.78)</p> <p><b>Executive function deficits:</b><br/>Time point 1 (9-15y)                      0.0 (SD 0.94)                      0.24 (SD 1.00)<br/>Time point 2 (11-17y)                      -0.38 (SD 0.82)                      -0.09 (SD 0.94)</p> |  |  |

|                                          |                                                                    |                                                                                                                                                                                                                                                                                                                                                                                                                                                                                                                                                                                                                                                                                                                                                                                                                                                                                                                                                |               |            |                |
|------------------------------------------|--------------------------------------------------------------------|------------------------------------------------------------------------------------------------------------------------------------------------------------------------------------------------------------------------------------------------------------------------------------------------------------------------------------------------------------------------------------------------------------------------------------------------------------------------------------------------------------------------------------------------------------------------------------------------------------------------------------------------------------------------------------------------------------------------------------------------------------------------------------------------------------------------------------------------------------------------------------------------------------------------------------------------|---------------|------------|----------------|
|                                          |                                                                    | <p><b><u>Sleep problems:</u></b></p> <p>Time point 1 (9-15y)                                    -0.45 (SD 1.17)                                    -0.24 (SD 1.08)</p> <p>Time point 2 (11-17y)                                    0.21 (SD 0.61)                                    0.43 (SD 0.68)</p> <p><b><u>Adjusted analysis:</u></b></p> <p>Cases had increased prevalence of executive function deficits at both time points after adjusting for age, sex, childhood standard of living and maternal depressive symptoms. No significant association with aggression, cooperation, activity and sleep after adjusting for covariates at second time point. Cases had more problem aggression at the first time point than at the second.</p> <p><b><u>Overall findings:</u></b></p> <p>Persisting parent-reported executive functioning deficits through adolescence at two time points after adjusting for confounding variables.</p> |               |            |                |
| <b>Galler et al 2010*</b><br><b>(++)</b> | Minnesota-General-Adjustment-and Morale-Scale<br><br>(adolescence) |                                                                                                                                                                                                                                                                                                                                                                                                                                                                                                                                                                                                                                                                                                                                                                                                                                                                                                                                                | Controls n=60 | Cases n=56 | <u>p value</u> |
|                                          |                                                                    | <p><b><u>Morale Scale:</u></b></p> <p>Youth depression score   -0.33 (SD 0.98)                                    0.30 (SD 1.01)                                    &lt;0.001</p> <p><b><u>Adjusted analysis:</u></b></p> <p>Adjusting for age, maternal depression symptoms and household standard of living the effect of malnutrition is similar to unadjusted estimates and remains significant.</p> <p><b><u>Overall findings:</u></b></p> <p>Early childhood malnutrition contributed independently to depressive symptoms after adjusting for confounding variables.</p>                                                                                                                                                                                                                                                                                                                                                                |               |            |                |

\*Studies are drawn from the same Barbados Nutrition Study



95% CI – 95% Confidence Intervals, CAARS - Attention-domain: Conners-ADHD-Rating-Scales, CPT – Conners-Continuous-Performance Test, NEO PI-R FFM – NEO Personality Inventory-Revised derived Five-Factor Model, SD – Standard Deviation, SDQ – Strengths and Difficulties Questionnaire, SCID-II-PQ – Structured Clinical Interview for DSM-IV Axis II Personality Disorders Personality Questionnaire, WHODAS – World Health Organization Disability Assessment Schedule
